# Supplementary material
Source: Research Square preprint supplement (doi:10.21203/rs.3.rs-9181909/v1)
Supplement: Supplementary file 1 [file bee4d0a1b4c1cf8f7f3db369.xlsx]

## Sheet: Table_S1
SampleID	Stage	Caste	Sex	Age	Species
MC-IC-F1	Adult	Worker	Female	Forager	M_capixaba
MC-IC-F2	Adult	Worker	Female	Forager	M_capixaba
MC-IC-F3	Adult	Worker	Female	Forager	M_capixaba
MC-IC-F4	Adult	Worker	Female	Forager	M_capixaba
MC-IC-N1	Adult	Worker	Female	Nurse	M_capixaba
MC-IC-N2	Adult	Worker	Female	Nurse	M_capixaba
MC-IC-N3	Adult	Worker	Female	Nurse	M_capixaba
MC-IC-N4	Adult	Worker	Female	Nurse	M_capixaba
MC-IC-L1	Larva	Larva	Larva	Larva	M_capixaba
MC-IC-L2	Larva	Larva	Larva	Larva	M_capixaba
MC-IC-L3	Larva	Larva	Larva	Larva	M_capixaba
MC-ME-1	Honey	Honey	Honey	Honey	M_capixaba
MC-ME-2	Honey	Honey	Honey	Honey	M_capixaba
MM-IC-F1	Adult	Worker	Female	Forager	M_mondury
MM-IC-F2	Adult	Worker	Female	Forager	M_mondury
MM-IC-F3	Adult	Worker	Female	Forager	M_mondury
MM-IC-N1	Adult	Worker	Female	Nurse	M_mondury
MM-IC-N2	Adult	Worker	Female	Nurse	M_mondury
MM-IC-N3	Adult	Worker	Female	Nurse	M_mondury
MM-IC-MA1	Adult	Male	Male	Male	M_mondury
MM-IC-MA2	Adult	Male	Male	Male	M_mondury
MM-IC-MA3	Adult	Male	Male	Male	M_mondury
MM-IC-MA4	Adult	Male	Male	Male	M_mondury
MM-IC-L1	Larva	Larva	Larva	Larva	M_mondury
MM-IC-L2	Larva	Larva	Larva	Larva	M_mondury
MM-IC-L3	Larva	Larva	Larva	Larva	M_mondury
MM-IC-RF1	Adult	Physo_queen	Female	Physo_queen	M_mondury
MM-IC-RF2	Adult	Physo_queen	Female	Physo_queen	M_mondury
MM-IC-RV1	Adult	Virgin_queen	Female	Virgin_queen	M_mondury
MM-IC-RV2	Adult	Virgin_queen	Female	Virgin_queen	M_mondury

## Sheet: Table_S2
Sample	Age	Observed	Shannon	Simpson
MC-IC-F1	Forager	9	1.13399	0.532267
MC-IC-F2	Forager	37	1.585	0.744209
MC-IC-F3	Forager	11	1.19161	0.522088
MC-IC-F6	Forager	11	1.49058	0.688892
MC-IC-N1	Nurse	14	1.39465	0.636465
MC-IC-N2	Nurse	8	0.900825	0.432567
MC-IC-N3	Nurse	18	1.36023	0.602613
MC-IC-N6	Nurse	17	0.844877	0.349063
MC-IC-L1	Larva	19	0.49286	0.164399
MC-IC-L2	Larva	15	0.529891	0.241776
MC-IC-L3	Larva	12	0.758022	0.357106
MM-IC-F1	Forager	27	0.817816	0.45714
MM-IC-F2	Forager	17	0.362855	0.137443
MM-IC-F3	Forager	29	1.32505	0.606642
MM-IC-N1	Nurse	12	0.557519	0.263965
MM-IC-N2	Nurse	12	1.30642	0.62174
MM-IC-N3	Nurse	16	1.50161	0.674812
MM-IC-MA1	Male	11	1.0286	0.573918
MM-IC-MA2	Male	13	0.770515	0.33489
MM-IC-MA3	Male	20	0.971377	0.519704
MM-IC-MA4	Male	15	1.53976	0.748168
MM-IC-L1	Larva	3	0.345311	0.169356
MM-IC-L2	Larva	9	0.602466	0.346755
MM-IC-L3	Larva	9	0.60035	0.290043
MM-IC-RF1	Physo_queen	4	0.761471	0.507673
MM-IC-RF2	Physo_queen	3	0.296302	0.150654
MM-IC-RV1	Virgin_queen	9	0.386856	0.221233
MM-IC-RV2	Virgin_queen	8	0.664751	0.356726

## Sheet: Table_S3
Shannon - M. mondury
ANCOVA summary								contrast	estimate	SE	df	t.ratio	p.value
	Df	Sum_Sq	Mean_Sq	F_value	Pr(>F)			Larva - Male	-0.602559	0.213845	23	-2.81774	0.044922
Caste_merged	3	2.112	0.704	7.185	0.00143	**		Larva - Queen	-0.0351807	0.209399	23	-0.168008	0.998263
Log_LibrarySize	1	0.1273	0.1273	1.299	0.26611			Larva - Worker	-0.628519	0.160634	23	-3.91275	0.00363309
Residuals	23	2.2536	0.098					Male - Queen	0.567379	0.221852	23	2.55747	0.0771312
								Male - Worker	-0.0259597	0.178623	23	-0.145332	0.998872
								Queen - Worker	-0.593338	0.177544	23	-3.34192	0.0139879
Simpson - M. mondury
ANCOVA summary								contrast	estimate	SE	df	t.ratio	p.value
	Df	Sum_Sq	Mean_Sq	F_value	Pr(>F)			Larva - Male	-0.321135	0.106709	23	-3.00945	0.0296286
Caste_merged	3	0.3908	0.13027	5.34	0.00612	**		Larva - Queen	-0.0777507	0.10449	23	-0.744098	0.878211
Log_LibrarySize	1	0.0297	0.02968	1.216	0.28148			Larva - Worker	-0.28508	0.0801561	23	-3.55655	0.00848559
Residuals	23	0.5612	0.0244					Male - Queen	0.243384	0.110704	23	2.19851	0.153534
								Male - Worker	0.036055	0.0891327	23	0.404509	0.977089
								Queen - Worker	-0.207329	0.0885945	23	-2.3402	0.118043
Shannon - Both species
	Df	Sum_Sq	Mean_Sq	F_value	Pr(>F)			contrast	estimate	SE	df	t.ratio	p.value
Age	2	1.3735	0.6867	5.905	0.012	*		Forrager - Larva	0.607628	0.196036	16	3.09957	0.0178713
Log_LibrarySize	1	0.0517	0.0517	0.444	0.515			Forrager - Nurse	-0.0040301	0.182882	16	-0.0220366	0.999732
Residuals	16	1.8607	0.1163					Larva - Nurse	-0.611658	0.200269	16	-3.05418	0.0195907
Simpson - Both species
	Df	Sum_Sq	Mean_Sq	F_value	Pr(>F)			contrast	estimate	SE	df	t.ratio	p.value
Age	2	0.2798	0.13988	5.333	0.0168	*		Forrager - Larva	0.279022	0.0931025	16	2.99694	0.0219871
Log_LibrarySize	1	0.0089	0.00889	0.339	0.5686			Forrager - Nurse	0.0112628	0.0868552	16	0.129673	0.990778
Residuals	16	0.4197	0.02623					Larva - Nurse	-0.267759	0.0951129	16	-2.81517	0.0316055
Shannon - M. capixaba
ANCOVA summary								contrast	estimate	SE	df	t.ratio	p.value
	Df	Sum_Sq	Mean_Sq	F_value	Pr(>F)			Forrager - Larva	0.608106	0.190354	17	3.1946	0.0247671
Age	3	1.5365	0.5122	4.67	0.0148	*		Forrager - Honey	-0.192884	0.282807	17	-0.682034	0.902497
Log_LibrarySize	1	0.0533	0.0533	0.486	0.495			Forrager - Nurse	-0.00417349	0.177596	17	-0.0234999	0.999995
Residuals	17	1.8644	0.1097					Larva - Honey	-0.80099	0.30691	17	-2.60986	0.0781291
								Larva - Nurse	-0.61228	0.194454	17	-3.14872	0.027182
								Honey - Nurse	0.18871	0.278197	17	0.678332	0.903877
Simpson - M. capixaba
ANCOVA summary								contrast	estimate	SE	df	t.ratio	p.value
	Df	Sum_Sq	Mean_Sq	F_value	Pr(>F)			Forrager - Larva	0.278953	0.0903224	17	3.08842	0.0306988
Age	3	0.3362	0.11205	4.538	0.0164	*		Forrager - Honey	-0.118757	0.134191	17	-0.884985	0.812604
Log_LibrarySize	1	0.0088	0.00883	0.357	0.5578			Forrager - Nurse	0.0112833	0.0842687	17	0.133897	0.999107
Residuals	17	0.4198	0.02469					Larva - Honey	-0.39771	0.145628	17	-2.73101	0.0620605
								Larva - Nurse	-0.26767	0.0922675	17	-2.90102	0.0445836
								Honey - Nurse	0.13004	0.132003	17	0.985125	0.759663

## Sheet: Table_S4
Comparison	Factor	Df	Sum of Squares	R2	F	P-value
M. capixaba (SPSC)	Age	2	1.41306	0.628	6.7394	0.002∗∗
	Residual	8	0.83869	0.372
	Total	10	2.25175	1
M. mondury (SPSM)	Age	2	0.47442	0.448	2.4368	0.019∗
	Residual	6	0.58407	0.552
	Total	8	1.05849	1
Both Species (SSP)	Age	2	0.9417	0.255	3.1834	0.001∗∗∗
	Species	1	0.3895	0.105	2.6334	0.022∗
	Residual	16	2.3665	0.64
	Total	19	3.6976	1
Caste and Sex (CS)	Group	3	0.9687	0.32452	2.0819	0.014 *
	Residual	13	2.0163	0.67548
	Total	16	2.985	1

## Sheet: Table_S5
Species	Differential Analysis Contrast	LFC	P.adjust	Taxon	Method
Both	workers vs larvae	2.33895	0.00576933	Bifidobacterium	AMCOM-BC
Both	workers vs larvae	-8.60253	1.35414e-06	Pseudomonas	AMCOM-BC
Both	workers vs larvae	25.7955	5.07877e-28	Prevotella_7	Deseq
Both	workers vs larvae	-28.8865	2.83284e-19	Erysipelatoclostridium	Deseq
Both	workers vs larvae	-28.8865	2.83284e-19	Tyzzerella_3	Deseq
Both	workers vs larvae	-27.6402	4.06312e-18	Sphingomonas	Deseq
Both	workers vs larvae	-27.4359	1.15221e-17	Staphylococcus	Deseq
Both	workers vs larvae	23.2772	2.29008e-14	Weissella	Deseq
Both	workers vs larvae	-13.8654	6.90019e-11	Pseudomonas	Deseq
Both	workers vs larvae	8.24933	1.63887e-07	Pectinatus	Deseq
Both	workers vs larvae	-12.3661	5.22749e-05	Stenotrophomonas	Deseq
Both	workers vs larvae	-9.81898	0.000618903	Allorhizobium-Neorhizobium-Pararhizobium-Rhizobium	Deseq
Both	workers vs larvae	-9.38078	0.000775258	Chryseobacterium	Deseq
Both	workers vs larvae	-6.0197	0.0204147	Lawsonella	Deseq
Both	workers vs larvae	4.08445	0.0223533	Leuconostoc	Deseq
Both	workers vs larvae	4.20558	0.0223533	Libanicoccus	Deseq
Both	workers vs larvae	-5.64625	0.0223533	Janibacter	Deseq
Both	workers vs larvae	-5.64625	0.0223533	Escherichia/Shigella	Deseq
Both	workers vs larvae	-5.3077	0.0296977	Microbacterium	Deseq
M. mondury	workers vs males	-6.93438	0.0446823	Acinetobacter	AMCOM-BC
M. mondury	workers vs males	-29.4185	2.4351e-22	Erwinia	Deseq
M. mondury	workers vs males	-16.5315	1.12513e-08	Serratia	Deseq
M. mondury	workers vs males	-7.50711	0.00993685	Saccharibacter	Deseq
Both	forgaers vs nurses	-7.89622	0.00627124	Ameyamaea	Deseq
Both	forgaers vs nurses	6.5089	0.0359389	Weissella	Deseq
M. mondury	queens vs larvae	13.0513	0.0020199	Kinneretia	Deseq
M. mondury	queens vs larvae	12.1588	0.00269897	Paucibacter	Deseq
M. mondury	queens vs larvae	10.7246	0.00432526	Corynebacterium_1	Deseq
M. mondury	queens vs larvae	11.0167	0.00432526	Roseomonas	Deseq
M. mondury	queens vs males	-8.62285	0.000981676	Saccharibacter	Deseq
M. mondury	queens vs males	-10.1834	0.00151578	Serratia	Deseq
M. mondury	queens vs males	-10.7999	0.00230806	Erwinia	Deseq
M. mondury	queens vs males	9.47499	0.0111166	Kinneretia	Deseq
M. mondury	queens vs males	-7.5571	0.0111586	Bifidobacterium	Deseq
M. mondury	queens vs males	6.94593	0.049288	Roseomonas	Deseq
M. mondury	queens vs workers	13.4482	5.67791e-05	Corynebacterium_1	Deseq
M. mondury	queens vs workers	13.4482	5.67791e-05	Kinneretia	Deseq
M. mondury	queens vs workers	12.4334	0.000154329	Paucibacter	Deseq
M. mondury	queens vs workers	-7.03975	0.000476055	Bifidobacterium	Deseq
M. mondury	queens vs workers	11.1244	0.000476055	Roseomonas	Deseq
M. mondury	queens vs workers	-6.44371	0.001729	Pectinatus	Deseq
M. mondury	queens vs workers	-6.15361	0.0094197	Bombella	Deseq
M. mondury	queens vs workers	-4.61616	0.0463095	Acinetobacter	Deseq
Both	M. mondury vs M. capixaba	-29.3956	1.3283e-21	Erysipelatoclostridium	Deseq
Both	M. mondury vs M. capixaba	-29.3956	1.3283e-21	Tyzzerella_3	Deseq
Both	M. mondury vs M. capixaba	-27.3926	6.2012e-19	Staphylococcus	Deseq
Both	M. mondury vs M. capixaba	-10.9483	0.00228964	Sphingomonas	Deseq
M. capixaba	workers vs larvae	-15.3731	4.77649e-15	Pseudomonas	Deseq
M. capixaba	workers vs larvae	-18.6488	5.94886e-12	Tyzzerella_3	Deseq
M. capixaba	workers vs larvae	-14.554	1.81318e-08	Stenotrophomonas	Deseq
M. capixaba	workers vs larvae	-12.5985	2.77837e-06	Allorhizobium-Neorhizobium-Pararhizobium-Rhizobium	Deseq
M. capixaba	workers vs larvae	-12.4944	0.000149099	Snodgrassella	Deseq
M. capixaba	workers vs larvae	-12.2383	0.000178825	Sphingomonas	Deseq
M. capixaba	workers vs larvae	-11.9506	0.000200754	Staphylococcus	Deseq
M. capixaba	workers vs larvae	-11.9983	0.000200754	Chryseobacterium	Deseq
M. capixaba	workers vs larvae	-10.7276	0.000927865	Sphingobium	Deseq
M. capixaba	workers vs larvae	-10.4585	0.00118306	Diaphorobacter	Deseq
M. capixaba	workers vs larvae	6.74223	0.00178174	Anthococcus	Deseq
M. capixaba	workers vs larvae	-9.99219	0.00178174	Empedobacter	Deseq
M. capixaba	workers vs larvae	6.22292	0.00324854	Prevotella_7	Deseq
M. capixaba	workers vs larvae	6.12854	0.00468568	Pectinatus	Deseq
M. capixaba	workers vs larvae	-8.98703	0.00485198	Lawsonella	Deseq
M. capixaba	workers vs larvae	-8.4813	0.0053688	Cutibacterium	Deseq
M. capixaba	workers vs larvae	-8.61846	0.00590202	Paracoccus	Deseq
M. capixaba	workers vs larvae	-8.62953	0.00590202	Janibacter	Deseq
M. capixaba	workers vs larvae	-8.62953	0.00590202	Escherichia/Shigella	Deseq
M. capixaba	workers vs larvae	8.13819	0.00749179	Fructobacillus	Deseq
M. capixaba	workers vs larvae	-8.27928	0.00788654	Microbacterium	Deseq
M. capixaba	workers vs larvae	-8.14348	0.00878138	Brevundimonas	Deseq
M. mondury	workers vs larvae	21.049	4.84315e-09	Atopobium	Deseq
M. mondury	workers vs larvae	13.1301	1.11383e-06	Bifidobacterium	Deseq
M. mondury	workers vs larvae	12.7007	8.32676e-06	Pectinatus	Deseq
M. mondury	workers vs larvae	8.89281	0.00320671	Weissella	Deseq
M. mondury	workers vs larvae	5.74702	0.0495576	Leuconostoc	Deseq

## Sheet: Table_S6
Dunn's post hoc test results
Genus_collapsed	group1	group2	statistic	p	p.adj	p.adj.signif
Ameyamaea	Larva	Nurse	-1.15142	0.249561	0.249561	ns
Ameyamaea	Larva	Forrager	-2.82919	0.00466657	0.0139997	*
Ameyamaea	Forrager	Queen	0.161	0.872094	1	ns
Ameyamaea	Nurse	Queen	-0.957525	0.338302	1	ns
Ameyamaea	Larva	Queen	-1.17112	0.24155	0.966202	ns
Ameyamaea	Nurse	Forrager	-1.81221	0.0699544	0.139909	ns
Anthococcus	Larva	Nurse	1.84226	0.0654364	0.196309	ns
Anthococcus	Larva	Forrager	1.05272	0.292468	0.584936	ns
Anthococcus	Forrager	Queen	-1.55821	0.119184	0.476736	ns
Anthococcus	Nurse	Queen	-1.98243	0.0474309	0.274619	ns
Anthococcus	Larva	Queen	-0.203322	0.838883	1	ns
Anthococcus	Nurse	Forrager	-0.852803	0.393769	0.584936	ns
Bifidobacterium	Larva	Nurse	1.67778	0.0933907	0.186781	ns
Bifidobacterium	Larva	Forrager	2.6647	0.0077056	0.0231168	*
Bifidobacterium	Forrager	Queen	-3.46442	0.000531367	0.00310638	**
Bifidobacterium	Nurse	Queen	-2.51212	0.0120009	0.0480035	*
Bifidobacterium	Larva	Queen	-0.372005	0.709889	0.709889	ns
Bifidobacterium	Nurse	Forrager	1.066	0.286422	0.286422	ns
Commensalibacter	Larva	Nurse	-0.0627621	0.949956	1	ns
Commensalibacter	Larva	Forrager	0.0627621	0.949956	1	ns
Commensalibacter	Forrager	Queen	-0.728954	0.46603	1	ns
Commensalibacter	Nurse	Queen	-0.672881	0.501023	1	ns
Commensalibacter	Larva	Queen	-0.698746	0.484711	1	ns
Commensalibacter	Nurse	Forrager	0.135582	0.892152	1	ns
Erysipelatoclostridium	Larva	Nurse	-2.76153	0.00575311	0.0172593	*
Erysipelatoclostridium	Larva	Forrager	-2.76153	0.00575311	0.0172593	*
Erysipelatoclostridium	Forrager	Queen	2.78063	0.00542529	0.0325517	*
Erysipelatoclostridium	Nurse	Queen	2.78063	0.00542529	0.0325517	*
Erysipelatoclostridium	Larva	Queen	1.04401	0.296482	0.592964	ns
Erysipelatoclostridium	Nurse	Forrager	0	1	1	ns
Fructobacillus	Larva	Nurse	0.31053	0.756158	1	ns
Fructobacillus	Larva	Forrager	1.82808	0.00407626	0.0122288	*
Fructobacillus	Forrager	Queen	-1.80511	0.0710573	0.426344	ns
Fructobacillus	Nurse	Queen	-0.998572	0.318002	1	ns
Fructobacillus	Larva	Queen	-1.0007	0.316972	1	ns
Fructobacillus	Nurse	Forrager	0.559017	0.57615	1	ns
Lactobacillus	Larva	Nurse	-0.164488	0.869347	1	ns
Lactobacillus	Larva	Forrager	-0.559259	0.575985	1	ns
Lactobacillus	Forrager	Queen	-0.0886405	0.929368	1	ns
Lactobacillus	Nurse	Queen	-0.507668	0.611686	1	ns
Lactobacillus	Larva	Queen	0.0182574	0.985433	1	ns
Lactobacillus	Nurse	Forrager	-0.426401	0.669815	1	ns
Other	Larva	Nurse	1.71067	0.0871412	0.174282	ns
Other	Larva	Forrager	1.90806	0.0563835	0.16915	ns
Other	Forrager	Queen	-0.886405	0.375399	1	ns
Other	Nurse	Queen	-1.20873	0.226765	0.90706	ns
Other	Larva	Queen	0.620752	0.534763	1	ns
Other	Nurse	Forrager	0.213201	0.83117	0.83117	ns
Prevotella_7	Larva	Nurse	2.78887	0.00528928	0.0158678	*
Prevotella_7	Larva	Forrager	1.59364	0.111017	0.222034	ns
Prevotella_7	Forrager	Queen	-1.81743	0.0691519	0.207456	ns
Prevotella_7	Nurse	Queen	-2.50121	0.012377	0.0618849	ns
Prevotella_7	Larva	Queen	0	1	1	ns
Prevotella_7	Nurse	Forrager	-1.29099	0.196706	0.222034	ns
Pseudomonas	Larva	Nurse	-2.86209	0.00420857	0.0126257	*
Pseudomonas	Larva	Forrager	-1.48039	0.138769	0.271186	ns
Pseudomonas	Forrager	Queen	-2.44224	0.0145966	0.0875798	ns
Pseudomonas	Nurse	Queen	-1.42185	0.15507	0.62028	ns
Pseudomonas	Larva	Queen	-1.98973	0.0466209	0.233105	ns
Pseudomonas	Nurse	Forrager	1.49241	0.135593	0.271186	ns
Snodgrassella	Larva	Nurse	-0.723947	0.469098	1	ns
Snodgrassella	Larva	Forrager	-0.952562	0.340812	1	ns
Snodgrassella	Nurse	Forrager	-0.246932	0.804961	1	ns
Snodgrassella	Forrager	Queen	-0.570789	0.568143	1	ns
Snodgrassella	Nurse	Queen	-0.670057	0.502822	1	ns
Snodgrassella	Larva	Queen	-1.29323	0.195932	1	ns
Relative abundance of bacteral genera per sample type
Sample	Acetobacter	Acinetobacter	Aeromicrobium	Alicycliphilus	Alkanindiges	Ameyamaea	Anthococcus	Bifidobacterium	Bombella	Cavicella	Citrobacter	Comamonas	Commensalibacter	Cutibacterium	Deinococcus	Dyella	Empedobacter	Erwinia	Erysipelatoclostridium	Fimbriiglobus	Fructobacillus	Lactobacillus	Lautropia	Leptothrix	Leuconostoc	Loriellopsis_LF-B5	Luteolibacter	Meiothermus	Mesoplasma	Microbacterium	Morganella	Niabella	Nocardioides	Oenococcus	Other	Ottowia	Paracraurococcus	Pectinatus	Pelomonas	Pluralibacter	Prevotella_7	Pseudomonas	Pseudorhodoferax	Pseudoxanthomonas	Ralstonia	Rhodoferax	Rickettsia	Roseateles	Rosenbergiella
Forrager	0.000407228	0.00212362	0	0.00412658	0	0.00330669	0.084249	0.314441	0.0770871	0	0.00602697	0	0.0645185	6.51565e-05	0	0	0	0	0	0	0.180296	0.0854446	0	0.000705862	0.0197543	0	0.000325782	0	0	0	0	0.000855179	0	0	0.000990571	0	0	0.0228706	0	0.000366505	0.0909259	0.00228048	0	0	0	0.000244337	0	0	0
Larva	0	5.038e-05	0	0	0	0.0696226	0.0105798	0.00045342	0.000253856	0	0	0	0.000314875	0.000181368	0	0	0.00055418	0	0.592982	0	0.000348784	0.035771	0	0	0.00024732	0	0	0	4.31828e-05	0.00037785	0	0	0	0	0.00245449	0	0	0	0	0	0	0.250145	0	0	0	0	0	0	0
Male	0	0.0438145	0	0	0	0	0.0135167	0.0106793	0.000352608	0	0	0	0	0	0	0	0	0.340435	0	0	0.0272613	0.00162455	0	0	0.000411154	0	0	0	4.40522e-05	0	0.452909	0	0	0	0.000600547	0	0	0.000118602	0	0	0	0	0	0	0	0	0	0	0.0105187
Nurse	0.00813162	0.00971065	0	0	0	0.0289546	0.0648529	0.064331	0.0107664	0	0	0.000506643	0.0673645	0	0	0	0	0.000303986	0	0	0.00178884	0.086567	0	0	0.0288095	0	0	0	0	0	0	0	0	0	0.00132924	0	0	0.0490177	0	0	0.162724	0.000168881	0	0	0	0.00144393	0	0	0.0125394
Physo_queen	0	0	0	0	0	0	0	0	0	0	0	0	0	0	0	0	0	0	0.912738	0	0	0.0661375	0	0	0	0	0	0	0	0	0	0	0	0	0.0211244	0	0	0	0	0	0	0	0	0	0	0	0	0	0
Virgin_queen	0	0	0	0	0	0.0347366	0.00897635	0	0	0	0	0	0	0.000318229	0	0	0	0	0.936924	0	0	0.0137151	0	0	0.000325461	0	0	0	0	0	0	0	0	0	0.00500388	0	0	0	0	0	0	0	0	0	0	0	0	0	0
Relative abundance of bacteral genera per sample
Sample	Group	Acetobacter	Acinetobacter	Aeromicrobium	Alicycliphilus	Alkanindiges	Ameyamaea	Anthococcus	Bifidobacterium	Bombella	Cavicella	Citrobacter	Comamonas	Commensalibacter	Cutibacterium	Deinococcus	Dyella	Empedobacter	Erwinia	Erysipelatoclostridium	Fimbriiglobus	Fructobacillus	Lactobacillus	Lautropia	Leptothrix	Leuconostoc	Loriellopsis_LF-B5	Luteolibacter	Meiothermus	Mesoplasma	Microbacterium	Morganella	Niabella	Nocardioides	Oenococcus	Other	Ottowia	Paracraurococcus	Pectinatus	Pelomonas	Pluralibacter	Prevotella_7	Pseudomonas	Pseudorhodoferax	Pseudoxanthomonas	Ralstonia	Rhodoferax	Rickettsia	Roseateles
MC-IC-F1	Forager	0	0	0	0	0	0	0.0247843	0.0454084	0.0145697	0	0	0	0.819852	0	0	0	0	0	0	0	0	0.0215417	0	0	0.0107258	0	0	0	0	0	0	0	0	0	0.000901284	0	0	0.00218932	0	0	0.0600271	0	0	0	0	0	0	0
MC-IC-F2	Forager	0.000919274	0.000544755	0	0	0	0	0.165542	0.33137	0.184609	0	0	0	0	0	0	0	0	0	0	0	0.00021214	0.0509442	0	0	0.0312135	0	0.000919274	0	0	0	0	0.0024131	0	0	0.00113128	0	0	0.0322365	0	0	0.195867	0.000561779	0	0	0	0.000689456	0	0
MC-IC-F3	Forager	0	0	0	0	0	0	0.0347782	0.353766	0.0111928	0	0	0	0	0.00112474	0	0	0	0	0	0	0	0.108377	0	0	0.0153374	0	0	0	0	0	0	0	0	0	0.00183652	0	0	0.0266585	0	0	0.229635	0.000781071	0	0	0	0	0	0
MC-IC-F4	Forager	0	0.00308307	0	0	0	0	0.212002	0.355517	0.0389724	0	0	0	0	0	0	0	0	0	0	0	0	0.103707	0	0	0.039099	0	0	0	0	0	0	0	0	0	0.00139933	0	0	0.171199	0	0	0.0678276	0.00719383	0	0	0	0	0	0
MC-IC-L1	Larva	0	0	0	0	0	0.0013869	0	0.00141427	0.000552775	0	0	0	0.00152072	0	0	0	0	0	0.0445997	0	0	0.000842045	0	0	0	0	0	0	0	0.00182487	0	0	0	0	0.00127135	0	0	0	0	0	0	0.86819	0	0	0	0	0	0
MC-IC-L2	Larva	0	6.64017e-05	0	0	0	0	0	0	0	0	0	0	0	0.000307345	0	0	0.00093911	0	0.959481	0	0	8.59835e-05	0	0	0	0	0	0	0	0	0	0	0	0	0.00336643	0	0	0	0	0	0	0.0291124	0	0	0	0	0	0
MC-IC-L3	Larva	0	0	0	0	0	0	0	0.00222021	0	0	0	0	0	0	0	0	0	0	0.242604	0	0.00104481	0.000813456	0	0	0	0	0	0	0	0	0	0	0	0	0.002799	0	0	0	0	0	0	0.735543	0	0	0	0	0	0
MC-IC-N1	Nurse	0	0	0	0	0	0	0.069948	0.166882	0.0606787	0	0	0	0	0	0	0	0	0	0	0	0	0.108961	0	0	0.0179958	0	0	0	0	0	0	0	0	0	0.0013717	0	0	0.072155	0	0	0.490906	0.0003358	0	0	0	0	0	0
MC-IC-N2	Nurse	0	0	0	0	0	0.0316811	0.327565	0.155536	0	0	0	0	0	0	0	0	0	0	0	0	0	0.209256	0	0	0.00375666	0	0	0	0	0	0	0	0	0	0.000101656	0	0	0.039469	0	0	0.232634	0	0	0	0	0	0	0
MC-IC-N3	Nurse	0.0982379	0.000272033	0	0	0	0.00293796	0.155354	0.219084	0.00563346	0	0	0	0	0	0	0	0	0	0	0	0.0120061	0.116403	0	0	0.00534174	0	0	0	0	0	0	0	0	0	0.0016465	0	0	0.128924	0	0	0.225978	0.000408049	0	0	0	0	0	0
MC-IC-N4	Nurse	0	0	0	0	0	0.200273	0.0600805	0.0902869	0.000506736	0	0	0.00561224	0	0	0	0	0	0.00336734	0	0	0	0.254968	0	0	0.00137755	0	0	0	0	0	0	0	0	0	0.00363449	0	0	0.0882632	0	0	0.278816	0.000187075	0	0	0	0.0126275	0	0
MC-ME-1	Honey	0	0.243369	0	0	0	0.0019443	0.00488042	0	0.282097	0	0	0	0	0.0358947	0	0	0	0	0	0	0	0.0728043	0	0	0.0938837	0	0	0	0.0155971	0	0	0	0	0	0.000899575	0	0	0	0	0.065807	0	0.00195261	0	0	0	0.000373903	0	0
MC-ME-2	Honey	0	0.155027	0.0086661	0	0.0102418	0.00315131	0.0299374	0.000246196	0.151255	0.016807	0	0.00709044	0	0.0252105	0.0196957	0.00630262	0.00682783	0	0	0.00630262	9.09031e-05	0.0957126	0.00945393	0.0136557	0.106572	0.00512088	0.00840349	0.0189079	0.00607752	0.00630262	0	0.00846914	0.00630262	0.00709044	0.00105237	0.0145748	0.00551479	0.000166656	0.0157565	0.00472696	0.000945393	0.000218841	0.00472696	0.0614505	0.01812	0.0118174	0.00472696	0.00630262
MM-IC-F1	Forager	0	0.000151951	0	0.0259837	0	0.0112824	0.0180032	0.791754	0.000119496	0	0	0	0	0	0	0	0	0	0	0	0.00658796	0.108857	0	0.00444457	0	0	0	0	0	0	0	0	0	0	0.00055636	0	0	0.00053256	0	0	0	0.0105986	0	0	0	0	0	0
MM-IC-F2	Forager	0	0.00244211	0	0	0	0.0188239	0.0400211	0.354677	0.00231285	0	0	0	0	0	0	0	0	0	0	0	0.00237242	0.424663	0	0	0.00464072	0	0	0	0	0	0	0	0	0	0.000376737	0	0	0.00691274	0	0	0	0.000945332	0	0	0	0	0	0
MM-IC-F3	Forager	0.000341686	0.00675779	0	0	0	0.000307517	0.0345103	0.0315205	0.0348188	0	0.0252848	0	0	0	0	0	0	0	0	0	0.75092	0.0249797	0	0	0.02193	0	0	0	0	0	0	0	0	0	0.00103136	0	0	0.0129446	0	0.00153759	0.00460137	0.000113895	0	0	0	0	0	0
MM-IC-L1	Larva	0	0	0	0	0	0.110564	0.34721	0	0	0	0	0	0	0	0	0	0	0	0	0	0	0.542225	0	0	0	0	0	0	0	0	0	0	0	0	0	0	0	0	0	0	0	0	0	0	0	0	0	0
MM-IC-L2	Larva	0	0	0	0	0	0.712178	0.0106858	0	0.00158507	0	0	0	0	0	0	0	0	0	0	0	0	0.198673	0	0	0.00342508	0	0	0	0.000598029	0	0	0	0	0	1.54472e-05	0	0	0	0	0	0	0	0	0	0	0	0	0
MM-IC-L3	Larva	0	0.000332318	0	0	0	0.450872	0.0375432	0	0.000740456	0	0	0	0	0	0	0	0	0	0	0	0.00810984	0.231509	0	0	0	0	0	0	0	0	0	0	0	0	3.31092e-05	0	0	0	0	0	0	0	0	0	0	0	0	0
MM-IC-MA1	Male	0	0	0	0	0	0	0	0.000337266	0.000114922	0	0	0	0	0	0	0	0	0.810352	0	0	9.37314e-05	0.00100807	0	0	0	0	0	0	0	0	0	0	0	0	1.09197e-05	0	0	0	0	0	0	0	0	0	0	0	0	0
MM-IC-MA2	Male	0	0	0	0	0	0	0.00527408	0.000686669	0	0	0	0	0	0	0	0	0	0.011466	0	0	1.1344e-05	0.000209095	0	0	7.37363e-05	0	0	0	0	0	0.967936	0	0	0	0.00116536	0	0	0.000143218	0	0	0	0	0	0	0	0	0	0
MM-IC-MA3	Male	0	0.449718	0	0	0	0	0	0	0.00262222	0	0	0	0	0	0	0	0	0.165289	0	0	0.243402	0.000846539	0	0	0.000511531	0	0	0	0.000452157	0	0.0287204	0	0	0	0.000515189	0	0	2.02891e-05	0	0	0	0	0	0	0	0	0	0
MM-IC-MA4	Male	0	0	0	0	0	0	0.250105	0.231153	0.00117285	0	0	0	0	0	0	0	0	0	0	0	0.0792254	0.0236878	0	0	0.00739184	0	0	0	0	0	0.00774383	0	0	0	0.00010287	0	0	0.00113179	0	0	0	0	0	0	0	0	0	0
MM-IC-N1	Nurse	0	0	0	0	0	0.0717935	0.374658	0.0550957	0.00506688	0	0	0	0	0	0	0	0	0	0	0	0	0.371783	0	0	0.00147496	0	0	0	0	0	0	0	0	0	5.9869e-05	0	0	0.0142484	0	0	0	0.000901362	0	0	0	0	0	0
MM-IC-N2	Nurse	0	0.0183075	0	0	0	0	0	0.00255869	0	0	0	0	0.134404	0	0	0	0	0	0	0	0.00158624	0.00666939	0	0	0.0499539	0	0	0	0	0	0	0	0	0	0.00103285	0	0	0.00258348	0	0	0	0	0	0	0	0	0	0
MM-IC-N3	Nurse	0	0.00377099	0	0	0	0.0408386	0.0561788	0.0863625	0.0284605	0	0	0	0	0	0	0	0	0	0	0	0	0.086772	0	0	0.0087475	0	0	0	0	0	0	0	0	0	0.00149045	0	0	0.145151	0	0	0.454707	0.000248637	0	0	0	0.00223773	0	0
MM-IC-RF1	Physo_queen	0	0	0	0	0	0	0	0	0	0	0	0	0	0	0	0	0	0	0.972025	0	0	0.00111592	0	0	0	0	0	0	0	0	0	0	0	0	0.0268595	0	0	0	0	0	0	0	0	0	0	0	0	0
MM-IC-RF2	Physo_queen	0	0	0	0	0	0	0	0	0	0	0	0	0	0	0	0	0	0	0.705016	0	0	0.293954	0	0	0	0	0	0	0	0	0	0	0	0	0.00103046	0	0	0	0	0	0	0	0	0	0	0	0	0
MM-IC-RV1	Virgin_queen	0	0	0	0	0	0	0	0	0	0	0	0	0	0	0	0	0	0	0.994685	0	0	1.2066e-05	0	0	0	0	0	0	0	0	0	0	0	0	0.00530301	0	0	0	0	0	0	0	0	0	0	0	0	0
MM-IC-RV2	Virgin_queen	0	0	0	0	0	0.598194	0.15458	0	0	0	0	0	0	0.00548016	0	0	0	0	0	0	0	0.235989	0	0	0.00560471	0	0	0	0	0	0	0	0	0	0.000151665	0	0	0	0	0	0	0	0	0	0	0	0	0
Relative abundance of bacteral families per sample type
Group	Acetobacteraceae	Bifidobacteriaceae	Burkholderiaceae	Chroococcidiopsaceae	Crocinitomicaceae	Deinococcaceae	Enterobacteriaceae	Entomoplasmataceae	Erysipelotrichaceae	Gemmataceae	Halomonadaceae	Lactobacillaceae	Leuconostocaceae	Micropepsaceae	Moraxellaceae	Neisseriaceae	Nocardioidaceae	Orbaceae	Other	Peptostreptococcaceae	Prevotellaceae	Propionibacteriaceae	Pseudomonadaceae	Rhodanobacteraceae	Rubritaleaceae	Sphingomonadaceae	Staphylococcaceae	Streptococcaceae	Thermaceae	Thermosynechococcaceae	Veillonellaceae	Verrucomicrobiaceae	Weeksellaceae	Xanthomonadaceae
Forrager	0.0827717	0.164525	0.000999247	0	0	0	0.106437	0.00181187	0	0	0.00290207	0.144979	0.190615	0	0.00261841	0.0014234	0	0.000276387	0.00180043	0	0.131471	7.89678e-05	0.00370941	0.000690969	0.000552775	5.02523e-05	0	0.123457	0	0	0.0366892	0	0.00177139	0.000368517
Larva	0.0105269	0.00017439	0.00119167	0	0	0	3.47001e-05	4.19828e-05	0.617683	0	0	0.0447133	0.000327466	0	4.47449e-05	0.00156806	0	0	0.00369201	0	0	0.000161934	0.296221	0	0	0.00233577	0.00468529	0.0114212	0	0	0	0	0.000944614	0.00423187
Male	0.0200624	0.03636	0.000213226	0	0	0	0.275965	0.000377992	0	0	0	0.0179222	0.17496	0	0.343565	0	0	0.000283494	8.91491e-05	0	0	0	0	0	0	0	0	0.128964	0	0	0.00123707	0	0	0
Nurse	0.023756	0.028315	0.000353938	0	0	0	0.0466233	0	0	0	0	0.116471	0.0122244	0	0.00937998	0.287963	0	0.0748972	0.00132055	0	0.260325	0	0.00021526	7.66865e-05	0	0.000316042	0	0.0753573	0	0	0.062368	0	3.71814e-05	0
Physo_queen	0	0	1.34925e-05	0	0	0	0	0	0.890911	0	0	0.0774557	0	0	0	0	0	0	0.0316195	0	0	0	0	0	0	0	0	0	0	0	0	0	0	0
Virgin_queen	0.0050987	0	6.89809e-05	0	0	0	0	0	0.960074	0	0	0.0168647	9.78274e-05	0	0	0	0	0	0.00783658	0	0	0.000279507	0	0	0	0	0.000146741	0.00953262	0	0	0	0	0	0
Relative abundance of bacteral phyla per sample type
Group	Phylum	MeanRelAbundance	NormalizedRelAbundance
Forrager	Acidobacteria	4.0818e-07	0.000981621
Forrager	Actinobacteria	9.57691e-05	0.230313
Forrager	Bacteroidetes	7.20579e-05	0.17329
Forrager	Chloroflexi	0	0
Forrager	Cyanobacteria	0	0
Forrager	Deinococcus-Thermus	0	0
Forrager	Fibrobacteres	0	0
Forrager	Firmicutes	0.000169994	0.408813
Forrager	Gemmatimonadetes	0	0
Forrager	Planctomycetes	1.22454e-06	0.00294486
Forrager	Proteobacteria	7.38692e-05	0.177646
Forrager	Tenericutes	2.0095e-06	0.0048326
Forrager	Verrucomicrobia	4.89816e-07	0.00117795
Larva	Acidobacteria	0	0
Larva	Actinobacteria	8.1647e-07	0.00243035
Larva	Bacteroidetes	1.37891e-06	0.00410455
Larva	Chloroflexi	4.31223e-07	0.0012836
Larva	Cyanobacteria	0	0
Larva	Deinococcus-Thermus	0	0
Larva	Fibrobacteres	0	0
Larva	Firmicutes	0.000246073	0.732476
Larva	Gemmatimonadetes	3.23417e-06	0.00962703
Larva	Planctomycetes	0	0
Larva	Proteobacteria	8.38474e-05	0.249585
Larva	Tenericutes	1.65855e-07	0.000493694
Larva	Verrucomicrobia	0	0
Male	Acidobacteria	0	0
Male	Actinobacteria	5.41189e-05	0.103824
Male	Bacteroidetes	0	0
Male	Chloroflexi	0	0
Male	Cyanobacteria	0	0
Male	Deinococcus-Thermus	0	0
Male	Fibrobacteres	4.38715e-06	0.00841651
Male	Firmicutes	0.000146559	0.281166
Male	Gemmatimonadetes	0	0
Male	Planctomycetes	0	0
Male	Proteobacteria	0.000315177	0.604651
Male	Tenericutes	1.01242e-06	0.00194227
Male	Verrucomicrobia	0	0
Nurse	Acidobacteria	0	0
Nurse	Actinobacteria	2.76845e-05	0.0587195
Nurse	Bacteroidetes	0.000203066	0.430707
Nurse	Chloroflexi	0	0
Nurse	Cyanobacteria	0	0
Nurse	Deinococcus-Thermus	0	0
Nurse	Fibrobacteres	0	0
Nurse	Firmicutes	0.000175535	0.372313
Nurse	Gemmatimonadetes	0	0
Nurse	Planctomycetes	0	0
Nurse	Proteobacteria	6.51854e-05	0.13826
Nurse	Tenericutes	0	0
Nurse	Verrucomicrobia	0	0
Physo_queen	Acidobacteria	0	0
Physo_queen	Actinobacteria	0	0
Physo_queen	Bacteroidetes	0	0
Physo_queen	Chloroflexi	0	0
Physo_queen	Cyanobacteria	0	0
Physo_queen	Deinococcus-Thermus	0	0
Physo_queen	Fibrobacteres	0	0
Physo_queen	Firmicutes	0.00101623	0.999976
Physo_queen	Gemmatimonadetes	0	0
Physo_queen	Planctomycetes	0	0
Physo_queen	Proteobacteria	2.4887e-08	2.44888e-05
Physo_queen	Tenericutes	0	0
Physo_queen	Verrucomicrobia	0	0
Virgin_queen	Acidobacteria	0	0
Virgin_queen	Actinobacteria	8.83309e-07	0.000861041
Virgin_queen	Bacteroidetes	0	0
Virgin_queen	Chloroflexi	1.39098e-05	0.0135591
Virgin_queen	Cyanobacteria	0	0
Virgin_queen	Deinococcus-Thermus	0	0
Virgin_queen	Fibrobacteres	0	0
Virgin_queen	Firmicutes	0.000962813	0.938541
Virgin_queen	Gemmatimonadetes	0	0
Virgin_queen	Planctomycetes	0	0
Virgin_queen	Proteobacteria	4.82553e-05	0.0470388
Virgin_queen	Tenericutes	0	0
Virgin_queen	Verrucomicrobia	0	0
Honey	Acidobacteria	8.69287e-06	0.00682816
Honey	Actinobacteria	1.67466e-05	0.0131542
Honey	Bacteroidetes	1.73049e-05	0.0135928
Honey	Chloroflexi	0	0
Honey	Cyanobacteria	9.82294e-05	0.0771582
Honey	Deinococcus-Thermus	6.78044e-05	0.0532596
Honey	Fibrobacteres	0	0
Honey	Firmicutes	0.000466602	0.366511
Honey	Gemmatimonadetes	0	0
Honey	Planctomycetes	1.52995e-05	0.0120176
Honey	Proteobacteria	0.000489706	0.384659
Honey	Tenericutes	6.41935e-05	0.0504233
Honey	Verrucomicrobia	2.85126e-05	0.0223964
[truncated: 13 more columns]

## Sheet: Table_S7
Capixaba_Larvae_Workers
	Pathway Name	Superclass	Class	lfc_(Intercept)	lfc_CasteWorker	se_(Intercept)	se_CasteWorker	W_(Intercept)	W_CasteWorker	p_(Intercept)	p_CasteWorker	q_(Intercept)	q_CasteWorker	diff_(Intercept)	diff_CasteWorker	passed_ss_(Intercept)	passed_ss_CasteWorker	diff_robust_(Intercept)	diff_robust_CasteWorker	lfc_(Intercept)_log2	lfc_CasteWorker_log2
4	1,4-dihydroxy-6-naphthoate biosynthesis II	Biosynthesis	Cofactor, Prosthetic Group, Electron Carrier, and Vitamin Biosynthesis	-3.43563	3.80936	0.0460353	0.438838	-74.6303	8.68056	2.0402e-11	5.39272e-05	7.0387e-09	0.000863289	TRUE	TRUE	TRUE	TRUE	TRUE	TRUE	-4.95656	5.49575
6	2-carboxy-1,4-naphthoquinol biosynthesis	Biosynthesis	Cofactor, Prosthetic Group, Electron Carrier, and Vitamin Biosynthesis	-2.13487	2.9811	0.632709	0.796489	-3.37417	3.7428	0.00820256	0.00460555	0.0297882	0.0211855	TRUE	TRUE	TRUE	TRUE	TRUE	TRUE	-3.07996	4.30082
7	2-methylcitrate cycle I	Degradation/Utilization/Assimilation	Carboxylate Degradation	2.42256	-3.54925	0.292298	0.390135	8.28799	-9.09748	3.38237e-05	1.71189e-05	0.000415916	0.000438299	TRUE	TRUE	TRUE	TRUE	TRUE	TRUE	3.49502	-5.12048
8	2-methylcitrate cycle II	Degradation/Utilization/Assimilation	Carboxylate Degradation	3.86386	-5.60825	0.499188	0.568081	7.74029	-9.87227	5.53342e-05	9.34248e-06	0.000530286	0.000402895	TRUE	TRUE	TRUE	TRUE	TRUE	TRUE	5.57438	-8.09099
13	4-aminobutanoate degradation V	Generation of Precursor Metabolite and Energy	Fermentation	1.90327	-3.13103	0.413963	0.673429	4.59767	-4.64938	0.00370106	0.00350596	0.0159608	0.0186793	TRUE	TRUE	TRUE	TRUE	TRUE	TRUE	2.74583	-4.51712
16	4-methylcatechol degradation (ortho cleavage)	Degradation/Utilization/Assimilation	Aromatic Compound Degradation	2.76534	-5.00598	0.489992	0.535031	5.64365	-9.35643	0.00242375	0.000234973	0.0120806	0.0025333	TRUE	TRUE	TRUE	TRUE	TRUE	TRUE	3.98955	-7.2221
22	acetyl-CoA fermentation to butanoate II	Generation of Precursor Metabolite and Energy	Fermentation	2.92465	-4.76525	0.626289	0.812856	4.66982	-5.86236	0.00343209	0.00108906	0.0155997	0.0089366	TRUE	TRUE	TRUE	TRUE	TRUE	TRUE	4.21938	-6.8748
26	adenosine nucleotides degradation II	Degradation/Utilization/Assimilation	Nucleoside and Nucleotide Degradation	2.10634	-2.85055	0.223529	0.710099	9.4231	-4.0143	5.85443e-06	0.00304408	0.00011221	0.0175034	TRUE	TRUE	TRUE	TRUE	TRUE	TRUE	3.0388	-4.11248
38	aromatic biogenic amine degradation (bacteria)	Degradation/Utilization/Assimilation	Amine and Polyamine Degradation	2.84428	-4.29442	0.264138	0.4593	10.7681	-9.34992	1.31082e-05	3.32631e-05	0.000226117	0.000675044	TRUE	TRUE	TRUE	TRUE	TRUE	TRUE	4.10343	-6.19554
39	aromatic compounds degradation via beta-ketoadipate	Degradation/Utilization/Assimilation	Aromatic Compound Degradation	4.73127	-6.8474	0.509453	0.583843	9.28697	-11.7282	1.47042e-05	2.55242e-06	0.000230588	0.000299017	TRUE	TRUE	TRUE	TRUE	TRUE	TRUE	6.82579	-9.87872
44	Bifidobacterium shunt	Generation of Precursor Metabolite and Energy	Fermentation	-2.43275	3.39069	0.331922	0.412423	-7.32928	8.22138	4.42397e-05	1.7786e-05	0.000467997	0.000438299	TRUE	TRUE	TRUE	TRUE	TRUE	TRUE	-3.50972	4.89173
48	catechol degradation I (meta-cleavage pathway)	Degradation/Utilization/Assimilation	Aromatic Compound Degradation	1.40373	-3.20229	0.434574	0.488603	3.23014	-6.55397	0.0319713	0.00280263	0.0855046	0.0169633	FALSE	TRUE	FALSE	TRUE	FALSE	TRUE	2.02516	-4.61993
50	catechol degradation III (ortho-cleavage pathway)	Degradation/Utilization/Assimilation	Aromatic Compound Degradation	4.73127	-6.8474	0.509453	0.583843	9.28697	-11.7282	1.47042e-05	2.55242e-06	0.000230588	0.000299017	TRUE	TRUE	TRUE	TRUE	TRUE	TRUE	6.82579	-9.87872
52	catechol degradation to beta-ketoadipate	Degradation/Utilization/Assimilation	Aromatic Compound Degradation	4.53073	-6.56091	0.504696	0.627557	8.97714	-10.4547	1.88809e-05	6.08457e-06	0.000264065	0.000299882	TRUE	TRUE	TRUE	TRUE	TRUE	TRUE	6.53646	-9.46539
62	cob(II)yrinate a,c-diamide biosynthesis II (late cobalt incorporation)	Biosynthesis	Cofactor, Prosthetic Group, Electron Carrier, and Vitamin Biosynthesis	3.40519	-4.95299	0.473486	0.518293	7.19174	-9.55636	9.32005e-05	1.18986e-05	0.000765575	0.000436973	TRUE	TRUE	TRUE	TRUE	TRUE	TRUE	4.91265	-7.14566
65	creatinine degradation I	Degradation/Utilization/Assimilation	Amine and Polyamine Degradation	0.653491	-1.83814	0.181596	0.273817	3.59859	-6.71303	0.0367987	0.00674628	0.0969127	0.0287342	FALSE	TRUE	FALSE	TRUE	FALSE	TRUE	0.942788	-2.65188
73	ectoine biosynthesis	Biosynthesis	Amine and Polyamine Biosynthesis	4.35782	-6.77775	0.428474	0.533522	10.1706	-12.7038	1.91351e-05	4.33358e-06	0.000264065	0.000299017	TRUE	TRUE	TRUE	TRUE	TRUE	TRUE	6.287	-9.77822
75	enterobactin biosynthesis	Biosynthesis	Secondary Metabolite Biosynthesis	1.73049	-3.34238	0.195407	0.511848	8.85583	-6.53002	0.0003052	0.00125998	0.00198668	0.00908443	TRUE	TRUE	TRUE	TRUE	TRUE	TRUE	2.49657	-4.82204
78	fatty acid beta-oxidation I	Degradation/Utilization/Assimilation	Fatty Acid and Lipid Degradation	2.60249	-3.80629	0.466107	0.91676	5.58346	-4.15189	0.000520191	0.00320065	0.00306351	0.0181021	TRUE	TRUE	TRUE	TRUE	TRUE	TRUE	3.7546	-5.49131
80	fatty acid salvage	Biosynthesis	Fatty Acid and Lipid Biosynthesis	3.6795	-5.34487	0.466103	0.588955	7.89417	-9.07517	4.80555e-05	1.74313e-05	0.000487622	0.000438299	TRUE	TRUE	TRUE	TRUE	TRUE	TRUE	5.3084	-7.71101
89	glucose and glucose-1-phosphate degradation	Degradation/Utilization/Assimilation	Carbohydrate Degradation	2.76556	-4.03925	0.402553	0.924245	6.87006	-4.37032	0.000128353	0.00237947	0.000984043	0.015489	TRUE	TRUE	TRUE	TRUE	TRUE	TRUE	3.98987	-5.8274
102	guanosine nucleotides degradation III	Degradation/Utilization/Assimilation	Nucleoside and Nucleotide Degradation	2.0878	-2.82507	0.173226	0.719093	12.0524	-3.92865	7.41909e-07	0.00346512	3.9164e-05	0.0186793	TRUE	TRUE	TRUE	TRUE	TRUE	TRUE	3.01206	-4.07571
106	heterolactic fermentation	Generation of Precursor Metabolite and Energy	Fermentation	-2.49304	3.47359	0.332943	0.409901	-7.48789	8.4742	3.73999e-05	1.39325e-05	0.000416224	0.000436973	TRUE	TRUE	TRUE	TRUE	TRUE	TRUE	-3.59669	5.01133
107	hexitol fermentation to lactate, formate, ethanol and acetate	Generation of Precursor Metabolite and Energy	Fermentation	-1.387	1.95278	0.284194	0.359593	-4.88047	5.43055	0.000870815	0.000416075	0.0049251	0.00422194	TRUE	TRUE	TRUE	TRUE	TRUE	TRUE	-2.00102	2.81727
122	L-glutamate and L-glutamine biosynthesis	Biosynthesis	Amino Acid Biosynthesis	2.92015	-4.89576	0.935894	1.02292	3.12017	-4.78608	0.0205804	0.00304381	0.0606858	0.0175034	FALSE	TRUE	FALSE	TRUE	FALSE	TRUE	4.21289	-7.06309
125	L-histidine degradation I	Degradation/Utilization/Assimilation	Amino Acid Degradation	-1.79766	2.51744	0.151662	0.293966	-11.8531	8.56372	8.5511e-07	1.27962e-05	3.9164e-05	0.000436973	TRUE	TRUE	TRUE	TRUE	TRUE	TRUE	-2.59347	3.6319
126	L-histidine degradation II	Degradation/Utilization/Assimilation	Amino Acid Degradation	-1.35866	1.91381	0.344146	0.46277	-3.9479	4.13556	0.00336541	0.00253837	0.0155997	0.0162174	TRUE	TRUE	TRUE	TRUE	TRUE	TRUE	-1.96013	2.76105
131	L-leucine degradation I	Degradation/Utilization/Assimilation	Amino Acid Degradation	3.10767	-4.22739	0.413348	0.819464	7.51829	-5.15872	3.6226e-05	0.000596111	0.000416224	0.00523863	TRUE	TRUE	TRUE	TRUE	TRUE	TRUE	4.48342	-6.09884
142	L-tryptophan degradation to 2-amino-3-carboxymuconate semialdehyde	Degradation/Utilization/Assimilation	Amino Acid Degradation	1.20758	-2.72433	0.142688	0.323096	8.46304	-8.43197	0.00106823	0.00108336	0.0059442	0.0089366	TRUE	TRUE	TRUE	TRUE	TRUE	TRUE	1.74217	-3.93038
143	L-tyrosine degradation I	Degradation/Utilization/Assimilation	Amino Acid Degradation	3.15266	-4.28924	0.485166	0.825128	6.4981	-5.19828	0.000111697	0.000565357	0.000881533	0.00523863	TRUE	TRUE	TRUE	TRUE	TRUE	TRUE	4.54832	-6.18807
154	mevalonate pathway I	Biosynthesis	Secondary Metabolite Biosynthesis	-2.77694	3.86395	0.238929	0.37799	-11.6225	10.2224	1.0105e-06	2.97873e-06	3.9164e-05	0.000299017	TRUE	TRUE	TRUE	TRUE	TRUE	TRUE	-4.00628	5.57451
164	NAD de novo biosynthesis II (from tryptophan)	Biosynthesis	Cofactor, Prosthetic Group, Electron Carrier, and Vitamin Biosynthesis	1.20064	-2.71046	0.144903	0.323868	8.28585	-8.36903	0.00115815	0.00111482	0.00634227	0.0089366	TRUE	TRUE	TRUE	TRUE	TRUE	TRUE	1.73216	-3.91037
168	nitrate reduction I (denitrification)	Degradation/Utilization/Assimilation	Inorganic Nutrient Metabolism	4.65189	-7.21887	0.520726	0.58787	8.93347	-12.2797	4.47649e-05	5.44657e-06	0.000467997	0.000299882	TRUE	TRUE	TRUE	TRUE	TRUE	TRUE	6.71126	-10.4146
170	norspermidine biosynthesis	Biosynthesis	Amine and Polyamine Biosynthesis	3.76221	-5.88434	0.486032	0.659093	7.74066	-8.92793	0.000112427	4.49456e-05	0.000881533	0.000775312	TRUE	TRUE	TRUE	TRUE	TRUE	TRUE	5.42772	-8.48931
173	Degradation/Utilization/Assimilation - Other	Degradation/Utilization/Assimilation - Other	Degradation/Utilization/Assimilation - Other	2.43229	-3.56314	0.4348	0.626232	5.59405	-5.68981	0.000513802	0.000459752	0.00306351	0.00453185	TRUE	TRUE	TRUE	TRUE	TRUE	TRUE	3.50905	-5.14053
179	pentose phosphate pathway	Generation of Precursor Metabolite and Energy	Pentose Phosphate Pathways	-1.54309	2.16741	0.267134	0.341973	-5.77646	6.33794	0.000267253	0.000134784	0.00189427	0.00164263	TRUE	TRUE	TRUE	TRUE	TRUE	TRUE	-2.22621	3.12691
183	peptidoglycan biosynthesis IV (Enterococcus faecium)	Biosynthesis	Cell Structure Biosynthesis	-1.94651	2.7221	0.276767	0.362196	-7.033	7.51556	6.09883e-05	3.633e-05	0.000553709	0.000696324	TRUE	TRUE	TRUE	TRUE	TRUE	TRUE	-2.80821	3.92717
186	phenylacetate degradation I (aerobic)	Degradation/Utilization/Assimilation	Aromatic Compound Degradation	1.89615	-3.23285	0.524341	0.632323	3.61625	-5.11266	0.0111471	0.00219397	0.0366262	0.0145561	TRUE	TRUE	TRUE	TRUE	TRUE	TRUE	2.73556	-4.66402
195	Metabolic Regulator Biosynthesis	Metabolic Regulator Biosynthesis	Metabolic Regulator Biosynthesis	2.87418	-4.19442	0.348293	0.983434	8.25219	-4.26507	3.49015e-05	0.00274245	0.000415916	0.0168954	TRUE	TRUE	TRUE	TRUE	TRUE	TRUE	4.14657	-6.05126
198	protocatechuate degradation II (ortho-cleavage pathway)	Degradation/Utilization/Assimilation	Aromatic Compound Degradation	2.16799	-3.43667	0.108533	0.400733	19.9754	-8.57594	1.02167e-06	0.000138076	3.9164e-05	0.00164263	TRUE	TRUE	TRUE	TRUE	TRUE	TRUE	3.12774	-4.95806
202	pyridoxal 5-phosphate biosynthesis I	Biosynthesis	Cofactor, Prosthetic Group, Electron Carrier, and Vitamin Biosynthesis	2.35927	-3.45883	0.423008	0.824051	5.57738	-4.19735	0.000523905	0.00300739	0.00306351	0.0175034	TRUE	TRUE	TRUE	TRUE	TRUE	TRUE	3.40371	-4.99004
207	pyrimidine deoxyribonucleotides de novo biosynthesis III	Biosynthesis	Nucleoside and Nucleotide Biosynthesis	-2.82754	3.93352	0.796379	0.855951	-3.55049	4.5955	0.00621113	0.00129882	0.0240954	0.00914479	TRUE	TRUE	TRUE	TRUE	TRUE	TRUE	-4.07927	5.67487
212	pyruvate fermentation to propanoate I	Generation of Precursor Metabolite and Energy	Fermentation	-1.48263	2.08428	0.196315	0.451665	-7.55229	4.61465	3.49611e-05	0.00126392	0.000415916	0.00908443	TRUE	TRUE	TRUE	TRUE	TRUE	TRUE	-2.13898	3.00697
222	sucrose degradation IV (sucrose phosphorylase)	Degradation/Utilization/Assimilation	Carbohydrate Degradation	2.49352	-3.38293	0.353932	0.82836	7.04519	-4.08389	6.01768e-05	0.00274201	0.000553709	0.0168954	TRUE	TRUE	TRUE	TRUE	TRUE	TRUE	3.59738	-4.88053
226	superpathway of (R,R)-butanediol biosynthesis	Generation of Precursor Metabolite and Energy	Fermentation	2.77496	-3.76991	0.48845	0.554662	5.68115	-6.79677	0.000301426	7.93425e-05	0.00198668	0.00114055	TRUE	TRUE	TRUE	TRUE	TRUE	TRUE	4.00342	-5.43883
243	superpathway of demethylmenaquinol-8 biosynthesis I	Biosynthesis	Cofactor, Prosthetic Group, Electron Carrier, and Vitamin Biosynthesis	-2.02871	2.83513	0.628972	0.751294	-3.22543	3.77367	0.0103985	0.0043916	0.0351713	0.0211855	TRUE	TRUE	FALSE	TRUE	FALSE	TRUE	-2.92681	4.09023
246	superpathway of fucose and rhamnose degradation	superpathway of fucose and rhamnose degradation	superpathway of fucose and rhamnose degradation	-3.50159	3.88422	0.0460353	0.443929	-76.0632	8.74964	3.47597e-10	0.000123385	3.99736e-08	0.00157658	TRUE	TRUE	TRUE	TRUE	TRUE	TRUE	-5.05173	5.60375
249	superpathway of geranylgeranyldiphosphate biosynthesis I (via mevalonate)	Biosynthesis	Secondary Metabolite Biosynthesis	-2.60682	3.63004	0.237635	0.368874	-10.9698	9.84087	1.64764e-06	4.08869e-06	4.83253e-05	0.000299017	TRUE	TRUE	TRUE	TRUE	TRUE	TRUE	-3.76085	5.23704
250	superpathway of glucose and xylose degradation	Degradation/Utilization/Assimilation	Carbohydrate Degradation	-1.872	2.61966	0.226056	0.32254	-8.28114	8.12197	1.67797e-05	1.96104e-05	0.000251695	0.000451039	TRUE	TRUE	TRUE	TRUE	TRUE	TRUE	-2.70073	3.77937
252	superpathway of glycol metabolism and degradation	Degradation/Utilization/Assimilation	Alcohol Degradation	2.8934	-4.58112	0.437532	0.567821	6.613	-8.0679	0.000300653	8.63571e-05	0.00198668	0.00119173	TRUE	TRUE	TRUE	TRUE	TRUE	TRUE	4.17429	-6.60917
278	superpathway of menaquinol-11 biosynthesis	Biosynthesis	Cofactor, Prosthetic Group, Electron Carrier, and Vitamin Biosynthesis	-1.95178	2.72936	0.627154	0.725903	-3.11213	3.75995	0.0124759	0.00448535	0.0398537	0.0211855	TRUE	TRUE	FALSE	TRUE	FALSE	TRUE	-2.81583	3.93764
279	superpathway of menaquinol-12 biosynthesis	Biosynthesis	Cofactor, Prosthetic Group, Electron Carrier, and Vitamin Biosynthesis	-1.95178	2.72936	0.627154	0.725903	-3.11213	3.75995	0.0124759	0.00448535	0.0398537	0.0211855	TRUE	TRUE	FALSE	TRUE	FALSE	TRUE	-2.81583	3.93764
280	superpathway of menaquinol-13 biosynthesis	Biosynthesis	Cofactor, Prosthetic Group, Electron Carrier, and Vitamin Biosynthesis	-1.95178	2.72936	0.627154	0.725903	-3.11213	3.75995	0.0124759	0.00448535	0.0398537	0.0211855	TRUE	TRUE	FALSE	TRUE	FALSE	TRUE	-2.81583	3.93764
282	superpathway of menaquinol-7 biosynthesis	Biosynthesis	Cofactor, Prosthetic Group, Electron Carrier, and Vitamin Biosynthesis	-1.92908	2.69814	0.623444	0.715044	-3.09423	3.7734	0.0128415	0.00439344	0.0406451	0.0211855	TRUE	TRUE	FALSE	TRUE	FALSE	TRUE	-2.78307	3.8926
283	superpathway of menaquinol-8 biosynthesis I	Biosynthesis	Cofactor, Prosthetic Group, Electron Carrier, and Vitamin Biosynthesis	-1.92321	2.69008	0.626015	0.716952	-3.07215	3.75211	0.0133076	0.00453991	0.0417375	0.0211855	TRUE	TRUE	FALSE	TRUE	FALSE	TRUE	-2.77461	3.88096
284	superpathway of menaquinol-8 biosynthesis II	Biosynthesis	Cofactor, Prosthetic Group, Electron Carrier, and Vitamin Biosynthesis	-3.04782	3.37308	0.0460353	0.389819	-66.2062	8.65294	4.71335e-11	5.50503e-05	8.13053e-09	0.000863289	TRUE	TRUE	FALSE	TRUE	FALSE	TRUE	-4.39708	4.86633
286	Aldehyde Degradation	Aldehyde Degradation	Aldehyde Degradation	2.78031	-5.80641	0.448249	0.507614	6.2026	-11.4386	0.00343646	0.000333308	0.0155997	0.00348458	TRUE	TRUE	TRUE	TRUE	TRUE	TRUE	4.01114	-8.37688
292	superpathway of phylloquinol biosynthesis	Biosynthesis	Cofactor, Prosthetic Group, Electron Carrier, and Vitamin Biosynthesis	-2.1157	2.95475	0.632603	0.787962	-3.34444	3.74987	0.00859918	0.00455562	0.0305847	0.0211855	TRUE	TRUE	TRUE	TRUE	TRUE	TRUE	-3.05232	4.26281
307	superpathway of salicylate degradation	Degradation/Utilization/Assimilation	Aromatic Compound Degradation	2.77654	-5.02557	0.469882	0.535253	5.90902	-9.38915	0.00197658	0.000231093	0.0103321	0.0025333	TRUE	TRUE	TRUE	TRUE	TRUE	TRUE	4.0057	-7.25037
309	superpathway of sulfur oxidation (Acidianus ambivalens)	Degradation/Utilization/Assimilation	Inorganic Nutrient Metabolism	1.35554	-2.22321	0.428493	0.523782	3.16351	-4.24454	0.0194782	0.00541263	0.0583815	0.0242514	FALSE	TRUE	FALSE	TRUE	FALSE	TRUE	1.95563	-3.20742
315	superpathway of UDP-glucose-derived O-antigen building blocks biosynthesis	Biosynthesis	Carbohydrate Biosynthesis	-1.27402	1.79744	0.124415	0.241859	-10.24	7.43176	2.93611e-06	3.96779e-05	5.95858e-05	0.000720467	TRUE	TRUE	TRUE	TRUE	TRUE	TRUE	-1.83802	2.59315
322	TCA cycle VIII (helicobacter)	Generation of Precursor Metabolite and Energy	TCA cycle	1.98833	-2.92891	0.264627	0.537222	7.51372	-5.45196	6.83837e-05	0.00060729	0.000604933	0.00523863	TRUE	TRUE	TRUE	TRUE	TRUE	TRUE	2.86855	-4.22553
328	toluene degradation I (aerobic) (via o-cresol)	Degradation/Utilization/Assimilation	Aromatic Compound Degradation	1.94511	-4.28505	0.370977	0.43719	5.24321	-9.80133	0.00632638	0.000607377	0.0240954	0.00523863	TRUE	TRUE	TRUE	TRUE	TRUE	TRUE	2.8062	-6.18202
329	toluene degradation II (aerobic) (via 4-methylcatechol)	Degradation/Utilization/Assimilation	Aromatic Compound Degradation	1.94511	-4.28505	0.370977	0.43719	5.24321	-9.80133	0.00632638	0.000607377	0.0240954	0.00523863	TRUE	TRUE	TRUE	TRUE	TRUE	TRUE	2.8062	-6.18202
330	toluene degradation III (aerobic) (via p-cresol)	Degradation/Utilization/Assimilation	Aromatic Compound Degradation	1.47171	-3.8837	0.179476	0.325269	8.20006	-11.94	0.00379527	0.00126358	0.0159679	0.00908443	TRUE	TRUE	TRUE	TRUE	TRUE	TRUE	2.12323	-5.60299
331	toluene degradation IV (aerobic) (via catechol)	Degradation/Utilization/Assimilation	Aromatic Compound Degradation	1.02504	-2.99056	0.215426	0.296863	4.75819	-10.0739	0.0176224	0.00208297	0.0533308	0.0140907	FALSE	TRUE	FALSE	TRUE	FALSE	TRUE	1.47882	-4.31447
Queens_Workers
	Pathway Name	Superclass	Class	lfc_(Intercept)	lfc_Caste_mergedWorker	se_(Intercept)	se_Caste_mergedWorker	W_(Intercept)	W_Caste_mergedWorker	p_(Intercept)	p_Caste_mergedWorker	q_(Intercept)	q_Caste_mergedWorker	diff_(Intercept)	diff_Caste_mergedWorker	passed_ss_(Intercept)	passed_ss_Caste_mergedWorker	diff_robust_(Intercept)	diff_robust_Caste_mergedWorker	lfc_(Intercept)_log2	lfc_Caste_mergedWorker_log2
8	2-carboxy-1,4-naphthoquinol biosynthesis	Biosynthesis	Cofactor, Prosthetic Group, Electron Carrier, and Vitamin Biosynthesis	-3.2416	3.39909	0.397147	0.779761	-8.16222	4.35915	0.000181987	0.00477492	0.0050513	0.0428227	TRUE	TRUE	TRUE	TRUE	TRUE	TRUE	-4.67664	4.90385
36	ADP-L-glycero-beta-D-manno-heptose biosynthesis	Biosynthesis	Carbohydrate Biosynthesis	-3.69765	4.00716	0.293981	0.441205	-12.5778	9.0823	1.54601e-05	0.000100003	0.00253646	0.00511442	TRUE	TRUE	TRUE	TRUE	TRUE	TRUE	-5.33458	5.7811
49	biotin biosynthesis II	Biosynthesis	Cofactor, Prosthetic Group, Electron Carrier, and Vitamin Biosynthesis	-3.48489	3.72348	0.289996	0.548189	-12.017	6.79232	2.01414e-05	0.000498422	0.00253646	0.0101535	TRUE	TRUE	TRUE	TRUE	TRUE	TRUE	-5.02763	5.37184
148	L-rhamnose degradation I	Degradation/Utilization/Assimilation	Carbohydrate Degradation	-3.49846	3.74157	0.293845	0.341732	-11.9058	10.9488	2.12553e-05	3.44653e-05	0.00253646	0.00511442	TRUE	TRUE	TRUE	TRUE	TRUE	TRUE	-5.04721	5.39795
206	preQ0 biosynthesis	Biosynthesis	Secondary Metabolite Biosynthesis	-3.27373	4.2295	0.451381	0.604963	-7.25269	6.99134	0.000169534	0.000213191	0.0050513	0.00680591	TRUE	TRUE	TRUE	TRUE	TRUE	TRUE	-4.72299	6.10188
245	superpathway of beta-D-glucuronosides degradation	Degradation/Utilization/Assimilation	Secondary Metabolite Degradation	-3.09303	3.20101	0.402426	0.657211	-7.68597	4.87059	0.000253921	0.00279271	0.0050513	0.0370293	TRUE	TRUE	TRUE	TRUE	TRUE	TRUE	-4.4623	4.61808
326	superpathway of ubiquinol-8 biosynthesis (prokaryotic)	Biosynthesis	Cofactor, Prosthetic Group, Electron Carrier, and Vitamin Biosynthesis	-3.01283	3.83816	0.396222	0.51945	-7.6039	7.38889	0.000125872	0.000150842	0.0050513	0.00675016	TRUE	TRUE	TRUE	TRUE	TRUE	TRUE	-4.3466	5.53729
Mondury_Larvae_Workers
	Pathway Name	Superclass	Class	lfc_(Intercept)	lfc_CasteWorker	se_(Intercept)	se_CasteWorker	W_(Intercept)	W_CasteWorker	p_(Intercept)	p_CasteWorker	q_(Intercept)	q_CasteWorker	diff_(Intercept)	diff_CasteWorker	passed_ss_(Intercept)	passed_ss_CasteWorker	diff_robust_(Intercept)	diff_robust_CasteWorker	lfc_(Intercept)_log2	lfc_CasteWorker_log2
4	1,4-dihydroxy-6-naphthoate biosynthesis II	Biosynthesis	Cofactor, Prosthetic Group, Electron Carrier, and Vitamin Biosynthesis	-3.62846	4.20944	2.04271e-06	0.446283	-1.77629e+06	9.43221	1.07332e-30	0.000226104	2.96508e-29	0.00644863	TRUE	TRUE	TRUE	TRUE	TRUE	TRUE	-5.23476	6.07293
8	2-carboxy-1,4-naphthoquinol biosynthesis	Biosynthesis	Cofactor, Prosthetic Group, Electron Carrier, and Vitamin Biosynthesis	-2.86582	3.14986	2.04271e-06	0.714405	-1.40295e+06	4.40907	3.49221e-30	0.00696261	5.57166e-29	0.042875	TRUE	TRUE	FALSE	TRUE	FALSE	TRUE	-4.1345	4.54429
10	2-methylcitrate cycle II	Degradation/Utilization/Assimilation	Carboxylate Degradation	-3.10134	4.02351	0.149444	0.796966	-20.7525	5.04853	8.14893e-07	0.00233702	4.54012e-06	0.0248574	TRUE	TRUE	TRUE	TRUE	TRUE	TRUE	-4.47428	5.80469
40	allantoin degradation to glyoxylate III	Degradation/Utilization/Assimilation	Amine and Polyamine Degradation	-2.53198	3.26436	0.134742	0.690857	-18.7912	4.72509	1.46676e-06	0.00324092	7.80047e-06	0.0277454	TRUE	TRUE	TRUE	TRUE	TRUE	TRUE	-3.65287	4.70948
68	colanic acid building blocks biosynthesis	Biosynthesis	Carbohydrate Biosynthesis	-3.72644	4.85698	0.0344777	0.599077	-108.083	8.10743	4.22849e-11	0.000188934	2.69854e-10	0.00644863	TRUE	TRUE	TRUE	TRUE	TRUE	TRUE	-5.37612	7.00714
71	D-fructuronate degradation	Degradation/Utilization/Assimilation	Secondary Metabolite Degradation	-3.9506	5.15586	0.318134	0.588189	-12.418	8.76566	1.66513e-05	0.000122124	7.89812e-05	0.00535817	TRUE	TRUE	TRUE	TRUE	TRUE	TRUE	-5.69951	7.43834
74	D-galacturonate degradation I	Degradation/Utilization/Assimilation	Secondary Metabolite Degradation	-4.38709	4.92469	2.04271e-06	0.563127	-2.14768e+06	8.74524	4.15391e-31	0.000323929	2.96508e-29	0.00703047	TRUE	TRUE	TRUE	TRUE	TRUE	TRUE	-6.32924	7.10482
79	enterobacterial common antigen biosynthesis	Biosynthesis	Cell Structure Biosynthesis	-3.61188	4.02028	2.04271e-06	0.873677	-1.76818e+06	4.60156	1.09818e-30	0.00583206	2.96508e-29	0.0379084	TRUE	TRUE	TRUE	TRUE	TRUE	TRUE	-5.21085	5.80003
83	fatty acid beta-oxidation I	Degradation/Utilization/Assimilation	Fatty Acid and Lipid Degradation	-2.39655	3.64385	0.307439	0.698852	-7.79519	5.21404	0.000107525	0.00123384	0.000477736	0.0160399	TRUE	TRUE	TRUE	TRUE	TRUE	TRUE	-3.45749	5.25696
85	fatty acid salvage	Biosynthesis	Fatty Acid and Lipid Biosynthesis	-1.75432	2.6805	0.308178	0.574397	-5.69254	4.66664	0.000741046	0.00229653	0.00313382	0.0248574	TRUE	TRUE	TRUE	TRUE	TRUE	TRUE	-2.53095	3.86715
92	gluconeogenesis I	Biosynthesis	Carbohydrate Biosynthesis	-2.95768	4.48555	0.453986	0.598617	-6.51491	7.49319	0.000329484	0.000138093	0.00142777	0.00538564	TRUE	TRUE	TRUE	TRUE	TRUE	TRUE	-4.26703	6.47128
93	glucose and glucose-1-phosphate degradation	Degradation/Utilization/Assimilation	Carbohydrate Degradation	-4.00342	5.22629	0.0344423	0.724853	-116.236	7.21014	2.73379e-11	0.000360537	1.77696e-10	0.00703047	TRUE	TRUE	TRUE	TRUE	TRUE	TRUE	-5.77572	7.53994
111	hexitol fermentation to lactate, formate, ethanol and acetate	Generation of Precursor Metabolite and Energy	Fermentation	-3.17554	4.12245	0.261193	0.398388	-12.1579	10.3478	1.88269e-05	4.76445e-05	8.81098e-05	0.0033266	TRUE	TRUE	FALSE	TRUE	FALSE	TRUE	-4.58134	5.94744
119	ketogluconate metabolism	Degradation/Utilization/Assimilation	Secondary Metabolite Degradation	-2.47854	3.19311	0.12886	0.533696	-19.2343	5.98301	1.27792e-06	0.000978992	6.90075e-06	0.0137451	TRUE	TRUE	TRUE	TRUE	TRUE	TRUE	-3.57577	4.60668
125	L-arginine degradation II (AST pathway)	Degradation/Utilization/Assimilation	Amino Acid Degradation	-3.99129	4.46291	2.04271e-06	0.77553	-1.95391e+06	5.75466	6.66465e-31	0.00222356	2.96508e-29	0.0248574	TRUE	TRUE	TRUE	TRUE	TRUE	TRUE	-5.75821	6.43862
126	L-glutamate and L-glutamine biosynthesis	Biosynthesis	Amino Acid Biosynthesis	-2.07639	3.16361	0.244913	0.726429	-8.47807	4.35502	6.28078e-05	0.00333438	0.000286306	0.0278659	TRUE	TRUE	TRUE	TRUE	TRUE	TRUE	-2.9956	4.56413
143	L-rhamnose degradation I	Degradation/Utilization/Assimilation	Carbohydrate Degradation	-4.15517	5.42862	0.0540481	0.30874	-76.8791	17.5831	3.2606e-10	2.17174e-06	2.00784e-09	0.000762279	TRUE	TRUE	TRUE	TRUE	TRUE	TRUE	-5.99465	7.83185
158	methylphosphonate degradation I	Degradation/Utilization/Assimilation	Inorganic Nutrient Metabolism	-4.17199	4.67373	2.04271e-06	0.662198	-2.04238e+06	7.05791	5.34102e-31	0.000882617	2.96508e-29	0.0129083	TRUE	TRUE	TRUE	TRUE	TRUE	TRUE	-6.01891	6.74277
171	NAD salvage pathway III (to nicotinamide riboside)	Biosynthesis	Cofactor, Prosthetic Group, Electron Carrier, and Vitamin Biosynthesis	-3.47648	4.5237	0.128819	0.818774	-26.9873	5.52497	1.70997e-07	0.00148007	1.00033e-06	0.0173927	TRUE	TRUE	TRUE	TRUE	TRUE	TRUE	-5.0155	6.52632
198	polymyxin resistance	Biosynthesis	Cell Structure Biosynthesis	-3.74031	4.1701	2.04271e-06	0.85736	-1.83105e+06	4.86389	9.22158e-31	0.00461744	2.96508e-29	0.0344835	TRUE	TRUE	TRUE	TRUE	TRUE	TRUE	-5.39612	6.01618
199	Metabolic Regulator Biosynthesis	Metabolic Regulator Biosynthesis	Metabolic Regulator Biosynthesis	-3.87458	5.05449	0.128923	0.754038	-30.0535	6.70323	9.00301e-08	0.00053516	5.35603e-07	0.00939206	TRUE	TRUE	TRUE	TRUE	TRUE	TRUE	-5.58983	7.29209
206	pyridoxal 5-phosphate biosynthesis I	Biosynthesis	Cofactor, Prosthetic Group, Electron Carrier, and Vitamin Biosynthesis	-3.08513	4.0019	0.128184	0.550137	-24.068	7.27438	3.37995e-07	0.000343492	1.94486e-06	0.00703047	TRUE	TRUE	FALSE	TRUE	FALSE	TRUE	-4.45091	5.77353
216	pyruvate fermentation to propanoate I	Generation of Precursor Metabolite and Energy	Fermentation	-2.95929	4.48796	0.251938	0.473199	-11.7461	9.48431	7.33873e-06	3.02973e-05	3.57763e-05	0.00282972	TRUE	TRUE	TRUE	TRUE	TRUE	TRUE	-4.26935	6.47476
218	reductive TCA cycle I	Degradation/Utilization/Assimilation	C1 Compound Utilization and Assimilation	-4.33963	5.67457	0.481595	0.581146	-9.01097	9.76444	0.000104551	6.63425e-05	0.000470481	0.0033266	TRUE	TRUE	TRUE	TRUE	TRUE	TRUE	-6.26077	8.18667
224	sucrose degradation IV (sucrose phosphorylase)	Degradation/Utilization/Assimilation	Carbohydrate Degradation	-3.275	4.25506	0.552274	0.914068	-5.93004	4.65509	0.00102567	0.00348516	0.00423539	0.0284486	TRUE	TRUE	FALSE	TRUE	FALSE	TRUE	-4.72483	6.13876
226	superpathay of heme b biosynthesis from glutamate	Biosynthesis	Cofactor, Prosthetic Group, Electron Carrier, and Vitamin Biosynthesis	-3.02135	4.58106	0.26335	0.47264	-11.4727	9.6925	8.59123e-06	2.62755e-05	4.13085e-05	0.00282972	TRUE	TRUE	TRUE	TRUE	TRUE	TRUE	-4.35889	6.60907
227	superpathway of (Kdo)2-lipid A biosynthesis	Biosynthesis	Cell Structure Biosynthesis	-3.70081	4.12402	2.04271e-06	0.798821	-1.81171e+06	5.16263	9.72429e-31	0.00357684	2.96508e-29	0.0285335	TRUE	TRUE	TRUE	TRUE	TRUE	TRUE	-5.33914	5.94971
235	superpathway of arginine and polyamine biosynthesis	Biosynthesis	Amine and Polyamine Biosynthesis	-3.8379	4.28396	2.04271e-06	0.459433	-1.87883e+06	9.32446	8.10722e-31	0.000238838	2.96508e-29	0.00644863	TRUE	TRUE	TRUE	TRUE	TRUE	TRUE	-5.53692	6.18045
239	superpathway of beta-D-glucuronosides degradation	Degradation/Utilization/Assimilation	Secondary Metabolite Degradation	-4.03059	4.50877	2.04271e-06	0.580734	-1.97316e+06	7.76392	6.34594e-31	0.000567082	2.96508e-29	0.00947837	TRUE	TRUE	TRUE	TRUE	TRUE	TRUE	-5.81492	6.50478
242	superpathway of chorismate metabolism	superpathway of chorismate metabolism	superpathway of chorismate metabolism	-2.3651	2.56569	2.04271e-06	0.511282	-1.15782e+06	5.01816	9.12207e-30	0.00404147	1.06728e-28	0.0308381	TRUE	TRUE	FALSE	TRUE	FALSE	TRUE	-3.41212	3.70151
246	superpathway of demethylmenaquinol-6 biosynthesis I	Biosynthesis	Cofactor, Prosthetic Group, Electron Carrier, and Vitamin Biosynthesis	-3.41286	3.78807	2.04271e-06	0.710355	-1.67075e+06	5.33265	1.45798e-30	0.00310786	3.35636e-29	0.0272715	TRUE	TRUE	TRUE	TRUE	TRUE	TRUE	-4.92371	5.46504
247	superpathway of demethylmenaquinol-8 biosynthesis I	Biosynthesis	Cofactor, Prosthetic Group, Electron Carrier, and Vitamin Biosynthesis	-2.6946	2.95011	2.04271e-06	0.630432	-1.31913e+06	4.67951	4.75192e-30	0.00543599	6.94968e-29	0.037895	TRUE	TRUE	FALSE	TRUE	FALSE	TRUE	-3.88749	4.25611
248	superpathway of demethylmenaquinol-9 biosynthesis	Biosynthesis	Cofactor, Prosthetic Group, Electron Carrier, and Vitamin Biosynthesis	-3.41286	3.78807	2.04271e-06	0.710355	-1.67075e+06	5.33265	1.45798e-30	0.00310786	3.35636e-29	0.0272715	TRUE	TRUE	TRUE	TRUE	TRUE	TRUE	-4.92371	5.46504
262	superpathway of heme b biosynthesis from uroporphyrinogen-III	Biosynthesis	Cofactor, Prosthetic Group, Electron Carrier, and Vitamin Biosynthesis	-3.46376	4.50674	0.0344698	0.77712	-100.487	5.79929	6.54597e-11	0.00115218	4.10292e-10	0.0155545	TRUE	TRUE	TRUE	TRUE	TRUE	TRUE	-4.99715	6.50186
281	superpathway of menaquinol-10 biosynthesis	Biosynthesis	Cofactor, Prosthetic Group, Electron Carrier, and Vitamin Biosynthesis	-3.30143	3.65807	2.04271e-06	0.677866	-1.6162e+06	5.39645	1.72121e-30	0.00295072	3.35636e-29	0.0272715	TRUE	TRUE	TRUE	TRUE	TRUE	TRUE	-4.76295	5.27748
282	superpathway of menaquinol-11 biosynthesis	Biosynthesis	Cofactor, Prosthetic Group, Electron Carrier, and Vitamin Biosynthesis	-2.59103	2.82928	2.04271e-06	0.612056	-1.26843e+06	4.62258	5.78068e-30	0.00572204	7.51488e-29	0.037895	TRUE	TRUE	FALSE	TRUE	FALSE	TRUE	-3.73807	4.08179
283	superpathway of menaquinol-12 biosynthesis	Biosynthesis	Cofactor, Prosthetic Group, Electron Carrier, and Vitamin Biosynthesis	-2.59103	2.82928	2.04271e-06	0.612056	-1.26843e+06	4.62258	5.78068e-30	0.00572204	7.51488e-29	0.037895	TRUE	TRUE	FALSE	TRUE	FALSE	TRUE	-3.73807	4.08179
284	superpathway of menaquinol-13 biosynthesis	Biosynthesis	Cofactor, Prosthetic Group, Electron Carrier, and Vitamin Biosynthesis	-2.59103	2.82928	2.04271e-06	0.612056	-1.26843e+06	4.62258	5.78068e-30	0.00572204	7.51488e-29	0.037895	TRUE	TRUE	FALSE	TRUE	FALSE	TRUE	-3.73807	4.08179
285	superpathway of menaquinol-6 biosynthesis I	Biosynthesis	Cofactor, Prosthetic Group, Electron Carrier, and Vitamin Biosynthesis	-3.30143	3.65807	2.04271e-06	0.677866	-1.6162e+06	5.39645	1.72121e-30	0.00295072	3.35636e-29	0.0272715	TRUE	TRUE	TRUE	TRUE	TRUE	TRUE	-4.76295	5.27748
286	superpathway of menaquinol-7 biosynthesis	Biosynthesis	Cofactor, Prosthetic Group, Electron Carrier, and Vitamin Biosynthesis	-2.54464	2.77516	2.04271e-06	0.593417	-1.24572e+06	4.67658	6.32711e-30	0.00545029	7.68086e-29	0.037895	TRUE	TRUE	FALSE	TRUE	FALSE	TRUE	-3.67115	4.00371
287	superpathway of menaquinol-8 biosynthesis I	Biosynthesis	Cofactor, Prosthetic Group, Electron Carrier, and Vitamin Biosynthesis	-2.54313	2.77339	2.04271e-06	0.598974	-1.24497e+06	4.63024	6.34601e-30	0.00568255	7.68086e-29	0.037895	TRUE	TRUE	FALSE	TRUE	FALSE	TRUE	-3.66896	4.00116
288	superpathway of menaquinol-8 biosynthesis II	Biosynthesis	Cofactor, Prosthetic Group, Electron Carrier, and Vitamin Biosynthesis	-3.18258	3.68925	2.04271e-06	0.394757	-1.55802e+06	9.34561	2.06749e-30	0.000236272	3.81941e-29	0.00644863	TRUE	TRUE	FALSE	TRUE	FALSE	TRUE	-4.5915	5.32246
289	superpathway of menaquinol-9 biosynthesis	Biosynthesis	Cofactor, Prosthetic Group, Electron Carrier, and Vitamin Biosynthesis	-3.30143	3.65807	2.04271e-06	0.677866	-1.6162e+06	5.39645	1.72121e-30	0.00295072	3.35636e-29	0.0272715	TRUE	TRUE	TRUE	TRUE	TRUE	TRUE	-4.76295	5.27748
296	superpathway of phylloquinol biosynthesis	Biosynthesis	Cofactor, Prosthetic Group, Electron Carrier, and Vitamin Biosynthesis	-2.83911	3.1187	2.04271e-06	0.699339	-1.38987e+06	4.4595	3.6596e-30	0.00664355	5.58487e-29	0.0416408	TRUE	TRUE	FALSE	TRUE	FALSE	TRUE	-4.09596	4.49933
297	superpathway of polyamine biosynthesis I	Biosynthesis	Amine and Polyamine Biosynthesis	-3.90302	4.35993	2.04271e-06	0.486944	-1.9107e+06	8.95366	7.45311e-31	0.000289695	2.96508e-29	0.00677887	TRUE	TRUE	TRUE	TRUE	TRUE	TRUE	-5.63087	6.29005
298	superpathway of polyamine biosynthesis II	Biosynthesis	Amine and Polyamine Biosynthesis	-2.97307	3.44482	2.04271e-06	0.612917	-1.45545e+06	5.62036	2.90613e-30	0.00246838	4.85739e-29	0.0254824	TRUE	TRUE	FALSE	TRUE	FALSE	TRUE	-4.28923	4.96982
302	superpathway of pyridoxal 5-phosphate biosynthesis and salvage	Biosynthesis	Cofactor, Prosthetic Group, Electron Carrier, and Vitamin Biosynthesis	-2.83727	3.67141	0.127414	0.479596	-22.2681	7.65522	5.36405e-07	0.000259596	3.03674e-06	0.00650844	TRUE	TRUE	FALSE	TRUE	FALSE	TRUE	-4.09331	5.29673
317	superpathway of thiamine diphosphate biosynthesis I	Biosynthesis	Cofactor, Prosthetic Group, Electron Carrier, and Vitamin Biosynthesis	-4.23844	4.75126	2.04271e-06	0.381767	-2.07491e+06	12.4455	4.93525e-31	5.93838e-05	2.96508e-29	0.0033266	TRUE	TRUE	TRUE	TRUE	TRUE	TRUE	-6.11478	6.85462
319	superpathway of ubiquinol-8 biosynthesis (prokaryotic)	Biosynthesis	Cofactor, Prosthetic Group, Electron Carrier, and Vitamin Biosynthesis	-1.85401	2.83004	0.577117	0.730935	-3.21254	3.87181	0.0148059	0.00611736	0.0514541	0.0390399	FALSE	TRUE	FALSE	TRUE	FALSE	TRUE	-2.67477	4.08289
328	TCA cycle VIII (helicobacter)	Generation of Precursor Metabolite and Energy	TCA cycle	-2.86935	3.71419	0.467439	0.595794	-6.13845	6.23402	0.000855438	0.000788357	0.00357451	0.0125386	TRUE	TRUE	FALSE	TRUE	FALSE	TRUE	-4.13959	5.35844
332	thiazole biosynthesis I (facultative anaerobic bacteria)	Biosynthesis	Cofactor, Prosthetic Group, Electron Carrier, and Vitamin Biosynthesis	-5.21999	5.8964	2.04271e-06	0.418069	-2.55542e+06	14.1039	1.74178e-31	3.22475e-05	2.96508e-29	0.00282972	TRUE	TRUE	TRUE	TRUE	TRUE	TRUE	-7.53085	8.50671
339	tRNA processing	Macromolecule Modification	Nucleic Acid Processing	-3.8422	4.28897	2.04271e-06	0.664848	-1.88093e+06	6.45106	8.06203e-31	0.00133159	2.96508e-29	0.0166924	TRUE	TRUE	TRUE	TRUE	TRUE	TRUE	-5.54312	6.18768
Both_species_Larvae_Workers
	Pathway Name	Superclass	Class	lfc_(Intercept)	lfc_CasteWorker	se_(Intercept)	se_CasteWorker	W_(Intercept)	W_CasteWorker	p_(Intercept)	p_CasteWorker	q_(Intercept)	q_CasteWorker	diff_(Intercept)	diff_CasteWorker	passed_ss_(Intercept)	passed_ss_CasteWorker	diff_robust_(Intercept)	diff_robust_CasteWorker	lfc_(Intercept)_log2	lfc_CasteWorker_log2
4	1,4-dihydroxy-6-naphthoate biosynthesis II	Biosynthesis	Cofactor, Prosthetic Group, Electron Carrier, and Vitamin Biosynthesis	-3.73017	4.1273	0.0939647	0.345994	-39.6975	11.9288	8.63228e-16	1.00953e-08	3.02993e-13	1.43441e-06	TRUE	TRUE	TRUE	TRUE	TRUE	TRUE	-5.38149	5.95444
7	2-carboxy-1,4-naphthoquinol biosynthesis	Biosynthesis	Cofactor, Prosthetic Group, Electron Carrier, and Vitamin Biosynthesis	-2.50589	3.03271	0.317779	0.538436	-7.88563	5.63245	6.68116e-07	3.74378e-05	1.11671e-05	0.00050541	TRUE	TRUE	TRUE	TRUE	TRUE	TRUE	-3.61524	4.37528
47	biotin biosynthesis II	Biosynthesis	Cofactor, Prosthetic Group, Electron Carrier, and Vitamin Biosynthesis	-3.58272	3.8435	0.425358	0.541895	-8.42283	7.0927	7.4814e-07	5.39851e-06	1.14173e-05	0.00014576	TRUE	TRUE	TRUE	TRUE	TRUE	TRUE	-5.16877	5.54499
68	D-fructuronate degradation	Degradation/Utilization/Assimilation	Secondary Metabolite Degradation	-1.80591	2.33812	0.568958	0.754184	-3.17407	3.1002	0.0055485	0.0065017	0.0299619	0.0308392	TRUE	TRUE	FALSE	TRUE	FALSE	TRUE	-2.60538	3.3732
76	enterobacterial common antigen biosynthesis	Biosynthesis	Cell Structure Biosynthesis	-3.61992	3.95658	0.21152	0.690934	-17.1138	5.72643	2.82434e-09	0.000132904	8.07077e-08	0.0016086	TRUE	TRUE	TRUE	TRUE	TRUE	TRUE	-5.22245	5.70814
86	fucose degradation	Degradation/Utilization/Assimilation	Carbohydrate Degradation	-4.23031	4.51156	0.265735	0.43122	-15.9193	10.4623	1.97155e-08	1.04887e-06	4.32509e-07	4.09059e-05	TRUE	TRUE	TRUE	TRUE	TRUE	TRUE	-6.10305	6.5088
91	gluconeogenesis I	Biosynthesis	Carbohydrate Biosynthesis	-1.65087	2.33304	0.685784	0.733052	-2.40727	3.18263	0.0270204	0.00515554	0.117088	0.0274181	FALSE	TRUE	TRUE	TRUE	FALSE	TRUE	-2.3817	3.36586
111	hexitol fermentation to lactate, formate, ethanol and acetate	Generation of Precursor Metabolite and Energy	Fermentation	-2.13247	2.7813	0.310345	0.37299	-6.87127	7.45678	2.71111e-06	9.37952e-07	2.97375e-05	4.09059e-05	TRUE	TRUE	FALSE	TRUE	FALSE	TRUE	-3.0765	4.01257
135	L-leucine degradation I	Degradation/Utilization/Assimilation	Amino Acid Degradation	2.34829	-3.38005	0.356275	0.605608	6.59123	-5.58125	3.436e-06	2.68657e-05	3.65465e-05	0.000468893	TRUE	TRUE	TRUE	TRUE	TRUE	TRUE	3.38787	-4.87638
143	L-rhamnose degradation I	Degradation/Utilization/Assimilation	Carbohydrate Degradation	-2.42064	2.98982	0.482942	0.606095	-5.01228	4.93293	0.000127668	0.000149862	0.000995808	0.00169683	TRUE	TRUE	FALSE	TRUE	FALSE	TRUE	-3.49225	4.3134
217	pyruvate fermentation to propanoate I	Generation of Precursor Metabolite and Energy	Fermentation	-2.30042	3.26096	0.453347	0.558524	-5.0743	5.83853	7.9073e-05	1.57132e-05	0.000676942	0.000344708	TRUE	TRUE	TRUE	TRUE	TRUE	TRUE	-3.3188	4.70457
219	reductive TCA cycle I	Degradation/Utilization/Assimilation	C1 Compound Utilization and Assimilation	-2.27713	2.97763	0.79248	0.841361	-2.87342	3.53907	0.0105393	0.00252114	0.0499905	0.0162068	TRUE	TRUE	FALSE	TRUE	FALSE	TRUE	-3.28521	4.29582
230	superpathway of (Kdo)2-lipid A biosynthesis	Biosynthesis	Cell Structure Biosynthesis	-3.48905	3.80192	0.185086	0.579273	-18.851	6.56326	1.00725e-09	4.06153e-05	3.21403e-08	0.000527999	TRUE	TRUE	FALSE	TRUE	FALSE	TRUE	-5.03364	5.48501
248	superpathway of demethylmenaquinol-8 biosynthesis I	Biosynthesis	Cofactor, Prosthetic Group, Electron Carrier, and Vitamin Biosynthesis	-2.37595	2.86565	0.316388	0.497539	-7.50961	5.75964	1.24749e-06	2.92864e-05	1.75148e-05	0.000468893	TRUE	TRUE	FALSE	TRUE	FALSE	TRUE	-3.42777	4.13425
251	superpathway of fucose and rhamnose degradation	superpathway of fucose and rhamnose degradation	superpathway of fucose and rhamnose degradation	-4.25798	4.20145	NA	0.311734	NA	13.4777	1	2.84701e-07	1	1.6655e-05	FALSE	TRUE	FALSE	TRUE	FALSE	TRUE	-6.14297	6.06142
264	superpathway of hexitol degradation (bacteria)	Degradation/Utilization/Assimilation	Secondary Metabolite Degradation	-2.49385	3.08395	0.350353	0.438104	-7.1181	7.0393	2.43782e-06	2.7967e-06	2.76024e-05	8.18034e-05	TRUE	TRUE	FALSE	TRUE	FALSE	TRUE	-3.59786	4.44919
265	superpathway of hexuronide and hexuronate degradation	superpathway of hexuronide and hexuronate degradation	superpathway of hexuronide and hexuronate degradation	-2.32016	2.4267	0.212968	0.491599	-10.8944	4.93635	1.40864e-07	0.000344196	2.90844e-06	0.0028765	TRUE	TRUE	FALSE	TRUE	FALSE	TRUE	-3.34729	3.50099
283	superpathway of menaquinol-11 biosynthesis	Biosynthesis	Cofactor, Prosthetic Group, Electron Carrier, and Vitamin Biosynthesis	-2.28931	2.75426	0.315693	0.481109	-7.25172	5.7248	1.93509e-06	3.13173e-05	2.42577e-05	0.000468893	TRUE	TRUE	FALSE	TRUE	FALSE	TRUE	-3.30278	3.97355
284	superpathway of menaquinol-12 biosynthesis	Biosynthesis	Cofactor, Prosthetic Group, Electron Carrier, and Vitamin Biosynthesis	-2.28931	2.75426	0.315693	0.481109	-7.25172	5.7248	1.93509e-06	3.13173e-05	2.42577e-05	0.000468893	TRUE	TRUE	FALSE	TRUE	FALSE	TRUE	-3.30278	3.97355
285	superpathway of menaquinol-13 biosynthesis	Biosynthesis	Cofactor, Prosthetic Group, Electron Carrier, and Vitamin Biosynthesis	-2.28931	2.75426	0.315693	0.481109	-7.25172	5.7248	1.93509e-06	3.13173e-05	2.42577e-05	0.000468893	TRUE	TRUE	FALSE	TRUE	FALSE	TRUE	-3.30278	3.97355
287	superpathway of menaquinol-7 biosynthesis	Biosynthesis	Cofactor, Prosthetic Group, Electron Carrier, and Vitamin Biosynthesis	-2.2584	2.71451	0.314183	0.47225	-7.18815	5.74802	2.15917e-06	2.99483e-05	2.61333e-05	0.000468893	TRUE	TRUE	FALSE	TRUE	FALSE	TRUE	-3.25818	3.9162
288	superpathway of menaquinol-8 biosynthesis I	Biosynthesis	Cofactor, Prosthetic Group, Electron Carrier, and Vitamin Biosynthesis	-2.25366	2.70842	0.315267	0.474111	-7.14844	5.71263	2.3128e-06	3.2061e-05	2.70597e-05	0.000468893	TRUE	TRUE	FALSE	TRUE	FALSE	TRUE	-3.25135	3.90742
289	superpathway of menaquinol-8 biosynthesis II	Biosynthesis	Cofactor, Prosthetic Group, Electron Carrier, and Vitamin Biosynthesis	-3.31726	3.65541	0.0943375	0.31821	-35.1637	11.4874	4.64093e-15	1.63466e-08	8.14484e-13	1.43441e-06	TRUE	TRUE	TRUE	TRUE	TRUE	TRUE	-4.78579	5.27364
297	superpathway of phylloquinol biosynthesis	Biosynthesis	Cofactor, Prosthetic Group, Electron Carrier, and Vitamin Biosynthesis	-2.48382	3.00433	0.317734	0.530663	-7.81728	5.66146	7.47403e-07	3.53918e-05	1.14173e-05	0.0004969	TRUE	TRUE	TRUE	TRUE	TRUE	TRUE	-3.58339	4.33433
298	superpathway of polyamine biosynthesis I	Biosynthesis	Amine and Polyamine Biosynthesis	-1.63151	1.9085	0.500381	0.613102	-3.26053	3.11287	0.004911	0.00669689	0.0273613	0.0313414	TRUE	TRUE	FALSE	TRUE	FALSE	TRUE	-2.35377	2.75339
332	thiazole biosynthesis I (facultative anaerobic bacteria)	Biosynthesis	Cofactor, Prosthetic Group, Electron Carrier, and Vitamin Biosynthesis	-2.00639	2.39049	0.666083	0.741037	-3.01222	3.22588	0.00826608	0.00528239	0.0420492	0.0276347	TRUE	TRUE	FALSE	TRUE	FALSE	TRUE	-2.8946	3.44875
333	thiazole biosynthesis II (aerobic bacteria)	Biosynthesis	Cofactor, Prosthetic Group, Electron Carrier, and Vitamin Biosynthesis	-3.12671	3.63738	0.195931	0.538798	-15.9583	6.7509	6.41574e-10	1.36047e-05	2.25193e-08	0.00034109	TRUE	TRUE	FALSE	TRUE	FALSE	TRUE	-4.51089	5.24762

## Sheet: Table_S8
Workers vs Males - M. mondury
ID	Description	GeneRatio	BgRatio	RichFactor	FoldEnrichment	zScore	pvalue	p.adjust	qvalue	geneID	Count	mean_LFC	median_LFC	n_sig_KOs	PathwayName
ko00910	ko00910	13/282	36/2477	0.361111	3.17189	4.70422	8.38222e-05	0.00729253	0.00652931	K15371/K15576/K02305/K04561/K00376/K00368/K01455/K15577/K15578/K15864/K02586/K02588/K15876	13	6.25653	6.2732	13	Nitrogen metabolism
ko00920	ko00920	14/282	46/2477	0.304348	2.6733	4.10527	0.000362093	0.0114077	0.0102138	K08357/K08358/K08359/K07306/K19713/K07308/K17226/K07307/K15551/K10831/K15552/K15555/K15553/K15554	14	-4.97489	-3.76062	14	Sulfur metabolism
ko01310	ko01310	8/282	18/2477	0.444444	3.90386	4.43114	0.000402081	0.0114077	0.0102138	K02305/K04561/K00376/K00368/K15864/K02586/K02588/K15876	8	5.84754	6.2732	8	Nitrogen cycle
ko00190	ko00190	17/282	64/2477	0.265625	2.33317	3.87238	0.00052449	0.0114077	0.0102138	K08738/K00404/K00406/K00405/K00407/K02275/K02276/K02258/K15408/K02117/K02118/K02119/K02120/K02121/K02122/K02123/K02124	17	7.09956	6.86476	17	Oxidative phosphorylation
ko00280	ko00280	11/282	36/2477	0.305556	2.6839	3.64727	0.00150297	0.0261517	0.0234147	K01640/K13766/K00253/K01968/K01969/K00249/K00263/K00248/K05606/K01848/K01849	11	6.95863	8.14222	11	Valine, leucine and isoleucine degradation
ko02020	ko02020	48/282	283/2477	0.169611	1.48981	3.13753	0.00183316	0.0265809	0.023799	K08357/K08358/K08359/K13040/K13041/K08738/K00404/K00406/K00405/K00407/K11688/K10941/K10942/K10943/K07346/K05877/K10125/K10126/K19609/K19610/K08083/K07810/K15011/K15012/K08082/K11690/K02661/K06597/K06598/K07651/K07775/K11383/K11384/K11614/K11615/K11689/K07720/K07717/K07719/K07777/K05339/K08349/K08350/K08348/K07793/K16692/K07644/K07347	48	2.42831	6.2732	48	Two-component system
Workers vs Larvae - M. mondury
ID	Description	GeneRatio	BgRatio	RichFactor	FoldEnrichment	zScore	pvalue	p.adjust	qvalue	geneID	Count	mean_LFC	median_LFC	n_sig_KOs	PathwayName
ko02010	ko02010	141/996	262/2460	0.538168	1.32921	4.64888	2.79726e-06	0.000302104	0.00025617	K10117/K10119/K10005/K15586/K10006/K10007/K10008/K17329/K17330/K17331/K10555/K10556/K10558/K02018/K02017/K02012/K02020/K02006/K02007/K02008/K02011/K02010/K02044/K02045/K02046/K02047/K11073/K07122/K02048/K11074/K11075/K11076/K13893/K10111/K05813/K05814/K05815/K05685/K13894/K13895/K13896/K10002/K10003/K10004/K10001/K10015/K10016/K10017/K06858/K10036/K10037/K10038/K12370/K12369/K12371/K12372/K11959/…	141	8.83221	9.7522	141	ABC transporters
ko02026	ko02026	30/996	42/2460	0.714286	1.7642	4.11947	4.20996e-05	0.00227338	0.00192772	K02777/K04333/K04334/K04336/K11531/K02405/K03563/K02398/K10914/K07678/K05851/K03087/K03567/K07677/K02402/K02403/K07648/K07687/K07773/K03566/K02425/K07676/K07689/K11931/K04335/K00688/K00694/K18968/K06204/K04761	30	10.1352	10.0778	30	Biofilm formation - Escherichia coli
ko01503	ko01503	28/996	41/2460	0.682927	1.68675	3.65687	0.000265261	0.00954941	0.00809745	K03673/K07637/K07660/K10012/K07264/K10011/K12962/K12963/K13014/K07662/K07640/K07771/K19226/K19227/K19228/K19229/K19230/K12975/K07806/K12973/K19236/K03760/K06079/K01406/K03585/K03767/K00677/K18138	28	9.20093	10.0854	28	Cationic antimicrobial peptide (CAMP) resistance
ko00340	ko00340	17/996	22/2460	0.772727	1.90854	3.53003	0.000479786	0.0129542	0.0109846	K11755/K07008/K01089/K01468/K01712/K01479/K01745/K05603/K02500/K02501/K00013/K01523/K01496/K00817/K01693/K00765/K01814	17	6.4616	4.7084	17	Histidine metabolism
ko00540	ko00540	24/996	35/2460	0.685714	1.69363	3.40836	0.000672615	0.0145285	0.0123195	K03278/K03275/K03276/K03279/K19353/K02841/K02843/K03269/K02844/K07264/K02560/K12975/K02849/K12973/K12974/K03760/K02517/K02848/K02536/K00677/K00748/K02535/K02527/K00912	24	10.3782	10.0515	24	Lipopolysaccharide biosynthesis
ko00020	ko00020	27/996	41/2460	0.658537	1.62651	3.33609	0.000831941	0.0149749	0.012698	K01610/K00239/K01902/K01903/K00240/K00024/K00241/K18118/K00174/K00175/K00176/K00177/K01677/K01678/K00242/K01676/K01682/K00163/K00245/K00246/K00247/K01596/K01681/K01647/K00031/K00658/K00164	27	9.32694	10.9048	27	Citrate cycle (TCA cycle)
ko00790	ko00790	24/996	36/2460	0.666667	1.64659	3.22292	0.00125242	0.0179046	0.0151822	K09007/K13818/K01497/K02619/K10026/K06879/K03831/K08310/K01664/K01077/K01724/K00500/K00796/K01113/K01495/K01633/K03750/K06897/K03639/K06920/K03637/K01737/K03635/K03752	24	7.00067	7.20408	24	Folate biosynthesis
ko05111	ko05111	25/996	38/2460	0.657895	1.62492	3.20161	0.00132626	0.0179046	0.0151822	K02777/K02405/K03563/K03606/K03557/K01912/K10914/K07678/K05851/K03087/K02458/K02459/K02460/K02461/K02452/K02472/K02779/K07689/K02457/K10941/K10942/K10943/K02462/K03666/K00640	25	9.02439	9.58326	25	Biofilm formation - Vibrio cholerae
ko00130	ko00130	21/996	31/2460	0.677419	1.67314	3.11038	0.001869	0.022428	0.0190179	K18285/K00355/K03186/K03182/K11782/K11784/K01661/K03181/K18800/K00457/K03184/K01911/K19222/K06134/K02552/K02549/K02551/K08680/K03179/K03183/K00568	21	8.78407	8.99935	21	Ubiquinone and other terpenoid-quinone biosynthesis
ko00190	ko00190	37/996	64/2460	0.578125	1.4279	2.8604	0.0034218	0.0346903	0.0294158	K00239/K00240/K00241/K00336/K00334/K00335/K00242/K00339/K00340/K00341/K00342/K00343/K00330/K00331/K00337/K00338/K13378/K00404/K00406/K00405/K00407/K00245/K00246/K00247/K02275/K02276/K02258/K15408/K01507/K02117/K02118/K02119/K02120/K02121/K02122/K02123/K02124	37	8.37115	10.1744	37	Oxidative phosphorylation
ko00040	ko00040	22/996	34/2460	0.647059	1.59816	2.89633	0.00353327	0.0346903	0.0294158	K00065/K00041/K01815/K01184/K00879/K01818/K03079/K01051/K00853/K01628/K01629/K00848/K01686/K00007/K01812/K01685/K00854/K00040/K01804/K00008/K03077/K00012	22	13.5511	10.3122	22	Pentose and glucuronate interconversions
Workers vs Larvae - M. capixaba
ID	Description	GeneRatio	BgRatio	RichFactor	FoldEnrichment	zScore	pvalue	p.adjust	qvalue	geneID	Count	mean_LFC	median_LFC	n_sig_KOs	PathwayName
ko02040	ko02040	33/919	46/2664	0.717391	2.07958	5.35911	2.2671e-07	2.49216e-05	2.26458e-05	K10941/K10943/K02424/K02556/K02557/K02415/K02392/K02406/K02387/K02388/K02389/K02390/K02401/K02408/K02409/K02410/K02412/K02416/K02417/K02419/K02420/K02421/K02400/K02397/K02405/K02422/K02411/K02396/K02407/K02386/K02393/K02394/K02398	33	-2.81605	-2.43669	33	Flagellar assembly
ko01310	ko01310	16/919	17/2664	0.941176	2.72829	5.18691	4.2601e-07	2.49216e-05	2.26458e-05	K02567/K02568/K00368/K00376/K15864/K00363/K00370/K00374/K02305/K04561/K02586/K02588/K03385/K15876/K00371/K00372	16	-5.02702	-10.3301	16	Nitrogen cycle
ko00910	ko00910	27/919	37/2664	0.72973	2.11534	4.95707	1.73952e-06	6.78412e-05	6.16461e-05	K02567/K02568/K00368/K00376/K01725/K15864/K15577/K15578/K15576/K00363/K00370/K00374/K02305/K04561/K02586/K02588/K03385/K15876/K00371/K01455/K00372/K01674/K15371/K00284/K00262/K01915/K00266	27	-5.6034	-10.2428	27	Nitrogen metabolism
ko00984	ko00984	14/919	15/2664	0.933333	2.70555	4.80634	3.23582e-06	8.81165e-05	8.00699e-05	K01796/K15983/K18364/K18365/K18366/K01822/K05296/K05898/K15982/K16047/K16048/K16049/K16050/K16051	14	-9.67243	-9.03022	14	Steroid degradation
ko00280	ko00280	26/919	36/2664	0.722222	2.09358	4.7933	3.76566e-06	8.81165e-05	8.00699e-05	K00248/K01641/K00263/K01028/K01029/K13766/K01848/K01849/K01640/K00249/K01968/K00822/K00253/K01969/K00166/K00167/K09699/K11381/K05606/K01907/K00128/K01965/K01966/K18661/K01847/K11263	26	-4.92942	-8.15925	26	Valine, leucine and isoleucine degradation
ko00552	ko00552	14/919	16/2664	0.875	2.53645	4.47266	1.76499e-05	0.000344172	0.000312743	K13678/K19005/K02851/K18704/K00712/K03739/K03740/K03367/K14188/K05946/K07271/K06153/K03429/K19302	14	2.75911	5.4178	14	Teichoic acid biosynthesis
ko01220	ko01220	41/919	70/2664	0.585714	1.69787	4.29323	2.58629e-05	0.00042618	0.000387262	K03381/K05549/K05550/K05783/K05784/K13954/K01055/K03464/K01856/K01821/K05710/K18364/K18365/K18366/K00055/K02554/K03379/K01666/K00448/K00449/K00001/K00141/K04073/K05713/K05714/K16049/K16050/K18067/K18068/K18069/K18074/K18075/K18076/K18077/K19065/K07104/K01826/K14519/K00529/K00481/K00480	41	-8.04668	-9.03022	41	Degradation of aromatic compounds
ko02020	ko02020	138/919	306/2664	0.45098	1.3073	4.14574	2.91405e-05	0.00042618	0.000387262	K02650/K12296/K02661/K06597/K06598/K07810/K10941/K10942/K10943/K11383/K11384/K11614/K11615/K11689/K19611/K08083/K15011/K15012/K08082/K00407/K03620/K06281/K06282/K01113/K00405/K07792/K00370/K00374/K00373/K19609/K19610/K00244/K07717/K07719/K07777/K00404/K00371/K07684/K02106/K10125/K10126/K07665/K07699/K07644/K02658/K02657/K02659/K02660/K06596/K02667/K02668/K16692/K14982/K14983/K11688/K07650/K07770/…	138	-4.11806	-7.26079	138	Two-component system
ko00622	ko00622	14/919	17/2664	0.823529	2.38725	4.1634	6.82514e-05	0.000887268	0.000806244	K05549/K05550/K05783/K05784/K01821/K18364/K18365/K18366/K00055/K02554/K01666/K00141/K04073/K07104	14	-7.02015	-10.5389	14	Xylene degradation
ko00362	ko00362	34/919	60/2664	0.566667	1.64266	3.65324	0.00031074	0.00363566	0.00330366	K01615/K03381/K05549/K05550/K05783/K05784/K07823/K01055/K03464/K01075/K01856/K01821/K18364/K18365/K18366/K07516/K00252/K02554/K00074/K01666/K00448/K00449/K04073/K04110/K15511/K15512/K15513/K15514/K19065/K01032/K07104/K01031/K00529/K00481	34	-7.73412	-9.03022	34	Benzoate degradation
ko00624	ko00624	12/919	16/2664	0.75	2.1741	3.41785	0.00108871	0.0115799	0.0105224	K00448/K00449/K04102/K18067/K18068/K18069/K18074/K18075/K18076/K18077/K19065/K00480	12	-8.70558	-9.03022	12	Polycyclic aromatic hydrocarbon degradation
Workers vs Larvae - Both Species
ID	Description	GeneRatio	BgRatio	RichFactor	FoldEnrichment	zScore	pvalue	p.adjust	qvalue	geneID	Count	mean_LFC	median_LFC	n_sig_KOs	PathwayName
ko01310	ko01310	16/858	18/2743	0.888889	2.84175	5.28817	5.87184e-07	5.02125e-05	4.56885e-05	K02586/K02588/K15876/K03385/K00363/K02567/K02568/K00368/K00376/K15864/K02305/K04561/K00372/K00370/K00374/K00371	16	-3.68541	-8.57299	16	Nitrogen cycle
ko00984	ko00984	14/858	15/2743	0.933333	2.98384	5.19698	8.5106e-07	5.02125e-05	4.56885e-05	K01822/K05296/K05898/K15982/K16047/K16048/K16049/K16050/K16051/K01796/K15983/K18364/K18365/K18366	14	-18.8129	-24.3685	14	Steroid degradation
ko02020	ko02020	136/858	315/2743	0.431746	1.38028	4.83899	1.51293e-06	5.95084e-05	5.41468e-05	K07650/K07699/K07770/K18349/K18350/K05876/K08357/K08358/K08359/K03620/K06281/K06282/K07717/K07719/K07777/K07792/K08372/K05964/K16692/K10941/K10943/K10942/K01643/K01646/K01910/K07665/K00404/K00405/K07810/K02661/K06597/K06598/K07644/K11383/K11384/K11614/K11615/K11689/K08082/K00407/K08083/K09476/K07662/K19609/K19610/K04751/K07640/K07648/K07771/K07773/K19611/K01113/K10125/K10126/K15011/K15012/K07774/…	136	-1.9309	-5.16503	136	Two-component system
ko00624	ko00624	14/858	16/2743	0.875	2.79735	4.86375	4.8461e-06	0.00014296	0.000130079	K18067/K18068/K18069/K18074/K18075/K18076/K18077/K19065/K04102/K00448/K00449/K00480/K04100/K04101	14	-16.897	-24.3685	14	Polycyclic aromatic hydrocarbon degradation
ko00910	ko00910	25/858	38/2743	0.657895	2.10327	4.61968	1.10489e-05	0.000230474	0.000209709	K02586/K02588/K15876/K03385/K00363/K02567/K02568/K01725/K00368/K00376/K15864/K02305/K04561/K15576/K01455/K00372/K15577/K15578/K00284/K00370/K00374/K00371/K15371/K05601/K01915	25	-4.66559	-8.46187	25	Nitrogen metabolism
ko02010	ko02010	126/858	297/2743	0.424242	1.35629	4.38607	1.1719e-05	0.000230474	0.000209709	K02006/K02007/K02008/K16784/K10094/K16783/K17329/K17330/K17331/K10006/K10008/K10005/K02196/K10108/K10109/K10110/K10119/K15554/K17316/K17317/K19340/K19341/K10036/K10037/K17315/K02063/K02064/K10038/K02062/K05776/K09997/K09998/K09999/K10000/K19226/K19227/K19228/K19229/K19230/K15555/K15576/K15577/K15578/K10229/K10227/K15553/K15770/K15771/K15772/K09996/K18889/K18890/K17074/K17076/K10118/K11959/K11960/…	126	1.4381	3.21696	126	ABC transporters
ko00362	ko00362	34/858	62/2743	0.548387	1.75318	4.04638	8.51465e-05	0.00143533	0.00130601	K01615/K04073/K04110/K15511/K15512/K15513/K15514/K19065/K01055/K07823/K05549/K05550/K05783/K05784/K03381/K03464/K01856/K01075/K00252/K07516/K02554/K18364/K18365/K18366/K00448/K00449/K01666/K00529/K00481/K04100/K04101/K10219/K10220/K10221	34	-10.3129	-8.52816	34	Benzoate degradation
ko01220	ko01220	37/858	70/2743	0.528571	1.68983	3.94377	0.00011838	0.0017461	0.00158878	K04073/K05713/K05714/K16049/K16050/K18067/K18068/K18069/K18074/K18075/K18076/K18077/K19065/K13954/K01055/K05549/K05550/K05783/K05784/K03381/K03464/K01856/K05710/K02554/K18364/K18365/K18366/K03379/K00448/K00449/K01666/K00480/K00529/K00141/K00481/K14519/K10219	37	-13.4767	-9.08117	37	Degradation of aromatic compounds
ko00190	ko00190	37/858	71/2743	0.521127	1.66603	3.83552	0.000174372	0.00228621	0.00208023	K06019/K00404/K00405/K15408/K00407/K00406/K00245/K00246/K00247/K02275/K02117/K02118/K02119/K02120/K02122/K02123/K02124/K02258/K00335/K02276/K13378/K00244/K00336/K00330/K00331/K00337/K00338/K00339/K00340/K00341/K00342/K00343/K02297/K02298/K02299/K02300/K02121	37	-1.11263	2.77987	37	Oxidative phosphorylation
ko00280	ko00280	22/858	36/2743	0.611111	1.9537	3.88546	0.000193813	0.00228699	0.00208093	K01848/K01849/K01028/K01029/K13766/K00263/K00248/K01640/K05606/K01968/K00253/K01969/K00822/K00249/K01847/K11381/K00166/K00167/K09699/K11263/K00020/K01907	22	-3.8261	-6.74445	22	Valine, leucine and isoleucine degradation
ko01503	ko01503	24/858	45/2743	0.533333	1.70505	3.21682	0.00159646	0.0171256	0.0155827	K07662/K07640/K07771/K19226/K19227/K19228/K19229/K19230/K12975/K07806/K12973/K19236/K10012/K06079/K10011/K12962/K12963/K13014/K03739/K03740/K03367/K14188/K07264/K01406	24	8.67791	10.4246	24	Cationic antimicrobial peptide (CAMP) resistance
ko00622	ko00622	11/858	17/2743	0.647059	2.06863	2.98133	0.0045377	0.0446208	0.0406005	K04073/K05549/K05550/K05783/K05784/K02554/K18364/K18365/K18366/K01666/K00141	11	-9.70943	-8.53461	11	Xylene degradation
Queens vs Workers - M. mondury
ID	Description	GeneRatio	BgRatio	RichFactor	FoldEnrichment	zScore	pvalue	p.adjust	qvalue	geneID	Count	mean_LFC	median_LFC	n_sig_KOs	PathwayName
ko02026	ko02026	33/1077	42/2499	0.785714	1.82312	4.68101	2.49938e-06	0.000277431	0.0002552	K02402/K02403/K07648/K07773/K02425/K07676/K07689/K01991/K02398/K07638/K07659/K04333/K04334/K04336/K11531/K14051/K03566/K06204/K10914/K04761/K07678/K05851/K03087/K03567/K07687/K07677/K11931/K00694/K04335/K18968/K07781/K07782/K00703	33	-15.6954	-13.4329	33	Biofilm formation - Escherichia coli
ko02010	ko02010	146/1077	269/2499	0.542751	1.25936	3.9182	6.28653e-05	0.00348903	0.00320944	K12369/K12371/K12372/K10546/K10547/K10548/K19309/K19310/K02062/K09997/K09998/K09999/K10000/K19226/K19227/K19228/K19229/K19230/K09996/K18889/K18890/K02063/K02064/K05776/K09688/K09689/K10107/K12536/K11604/K11606/K11607/K11605/K06073/K06074/K10119/K10005/K02065/K02066/K02067/K18231/K15586/K11720/K06861/K11085/K09808/K07091/K10006/K10007/K10008/K17329/K17330/K17331/K07323/K02011/K09810/K02044/K02471/…	146	-12.6711	-13.1519	146	ABC transporters
ko00130	ko00130	24/1077	31/2499	0.774194	1.79639	3.88228	9.81509e-05	0.00363158	0.00334057	K03184/K19222/K18240/K03179/K00355/K03186/K03182/K00568/K03185/K18285/K11782/K11784/K03181/K18800/K06134/K01661/K00457/K03183/K01911/K08680/K02549/K02551/K02552/K02361	24	-13.0154	-12.7938	24	Ubiquinone and other terpenoid-quinone biosynthesis
ko00540	ko00540	26/1077	35/2499	0.742857	1.72368	3.75157	0.000165649	0.00459675	0.0042284	K03760/K02560/K12975/K02849/K12973/K12974/K02517/K03278/K03279/K03275/K03276/K02536/K00677/K00748/K02527/K02535/K00912/K02841/K02843/K09949/K19353/K03269/K02844/K07264/K12979/K02848	26	-18.0882	-15.0656	26	Lipopolysaccharide biosynthesis
ko01503	ko01503	29/1077	41/2499	0.707317	1.64121	3.60211	0.000289401	0.0064247	0.00590987	K03760/K07640/K07771/K12975/K19226/K19227/K19228/K19229/K19230/K07806/K12973/K19236/K07662/K06079/K01406/K03585/K00677/K12340/K18138/K03673/K07637/K07660/K10012/K07264/K10011/K12962/K12963/K13014/K07643	29	-19.8732	-25.5492	29	Cationic antimicrobial peptide (CAMP) resistance
ko00860	ko00860	36/1077	56/2499	0.642857	1.49164	3.2377	0.00100615	0.0163228	0.0150148	K00230/K00768/K02231/K02189/K00228/K02302/K02190/K05934/K02188/K08973/K01698/K01749/K02304/K02191/K03399/K16651/K01845/K00798/K02492/K01719/K02233/K00643/K02232/K09882/K09883/K01599/K02224/K02227/K03394/K05895/K05936/K06042/K02496/K13542/K02303/K03404	36	-12.7948	-12.4677	36	Porphyrin metabolism
ko00040	ko00040	24/1077	34/2499	0.705882	1.63788	3.25856	0.00102936	0.0163228	0.0150148	K00065/K00041/K01685/K01815/K01184/K00879/K08323/K01051/K08322/K00880/K01628/K00012/K01629/K01805/K00853/K01804/K00848/K00007/K01686/K01812/K00040/K03077/K00008/K01818	24	-15.4988	-11.6878	24	Pentose and glucuronate interconversions
ko00190	ko00190	42/1077	68/2499	0.617647	1.43315	3.15103	0.00129653	0.0164264	0.0151101	K00245/K00246/K00247/K00239/K00240/K00411/K00412/K02297/K02298/K02299/K02300/K00242/K06019/K00335/K00241/K02117/K02118/K02119/K02120/K02122/K02123/K02124/K13378/K00339/K00340/K00341/K00342/K00343/K00330/K00331/K00337/K00338/K00404/K00406/K02121/K00405/K02274/K00407/K02258/K15408/K02275/K02276	42	-7.48031	-11.8183	42	Oxidative phosphorylation
ko05111	ko05111	26/1077	38/2499	0.684211	1.5876	3.17592	0.00133187	0.0164264	0.0151101	K02472/K07689/K03666/K02454/K02456/K03606/K02453/K02455/K01912/K03557/K10914/K07678/K05851/K03087/K02458/K02459/K02460/K02461/K02452/K02779/K02462/K02457/K10941/K10942/K10943/K02463	26	-13.0889	-12.7901	26	Biofilm formation - Vibrio cholerae
Queens vs Males - M. mondury
ID	Description	GeneRatio	BgRatio	RichFactor	FoldEnrichment	zScore	pvalue	p.adjust	qvalue	geneID	Count	mean_LFC	median_LFC	n_sig_KOs	PathwayName
ko00920	ko00920	33/828	40/2228	0.825	2.21993	5.98621	3.89601e-09	4.01289e-07	3.44489e-07	K00381/K00390/K00957/K01082/K01011/K04091/K02048/K00299/K17218/K00641/K10764/K00380/K00956/K02045/K02046/K02047/K03119/K00955/K00860/K02439/K07307/K15553/K08357/K08358/K08359/K07306/K07308/K15554/K15555/K10831/K15551/K15552/K17228	33	-15.7809	-15.8407	33	Sulfur metabolism
ko00860	ko00860	38/828	54/2228	0.703704	1.89354	5.11085	5.51901e-07	2.84229e-05	2.43998e-05	K00228/K02302/K01749/K01698/K01599/K01719/K08973/K00768/K02231/K00643/K09882/K09883/K00230/K01845/K02492/K02496/K02188/K02189/K05934/K02225/K02229/K02233/K00798/K02224/K02227/K02232/K03394/K05895/K05936/K06042/K00595/K02230/K02190/K02191/K02304/K03399/K04720/K16651	38	-11.7582	-13.038	38	Porphyrin metabolism
ko02020	ko02020	119/828	232/2228	0.512931	1.38021	4.70429	2.50477e-06	7.0971e-05	6.09255e-05	K07699/K07787/K07718/K07813/K12340/K07789/K00990/K07657/K07712/K07788/K07799/K07638/K07659/K07347/K01991/K09474/K01644/K01643/K01646/K01910/K07645/K07346/K01425/K10001/K07666/K00692/K07642/K07664/K07708/K10002/K10003/K10004/K10914/K06281/K06282/K08348/K05874/K02398/K07792/K13598/K13599/K14980/K14981/K05964/K13584/K02402/K02403/K02472/K05875/K06080/K07165/K07637/K07640/K07648/K07660/K07662/K07675/…	119	-12.6815	-15.9075	119	Two-component system
ko00130	ko00130	22/828	27/2228	0.814815	2.19252	4.79346	2.75616e-06	7.0971e-05	6.09255e-05	K00568/K03179/K03185/K03181/K03186/K03182/K03184/K18800/K19222/K03809/K00355/K03183/K01661/K08680/K01911/K02549/K02551/K02552/K18240/K18285/K11782/K11784	22	-12.8418	-12.6583	22	Ubiquinone and other terpenoid-quinone biosynthesis
ko01503	ko01503	28/828	39/2228	0.717949	1.93187	4.51416	9.97051e-06	0.000205392	0.000176321	K12340/K00677/K03585/K18138/K03673/K07264/K07637/K07640/K07660/K07662/K07771/K07806/K10011/K10012/K12962/K12963/K12973/K12975/K13014/K19226/K19227/K19228/K19229/K19230/K19236/K06079/K01406/K03760	28	-16.054	-15.9113	28	Cationic antimicrobial peptide (CAMP) resistance
ko00540	ko00540	22/828	30/2228	0.733333	1.97327	4.12659	5.53881e-05	0.000950829	0.000816246	K02517/K00677/K00748/K00912/K02527/K02535/K02536/K03269/K02841/K02843/K09949/K07264/K19353/K02560/K02844/K02849/K12973/K12974/K12975/K12979/K02847/K03760	22	-16.0712	-15.9194	22	Lipopolysaccharide biosynthesis
ko01240	ko01240	100/828	200/2228	0.5	1.34541	3.93666	7.04028e-05	0.00103593	0.000889299	K00652/K02169/K00228/K00254/K00275/K00568/K01665/K01737/K01920/K02170/K02302/K03179/K03185/K03474/K00767/K01935/K00647/K01749/K00833/K01698/K03149/K00012/K00946/K01599/K01719/K03635/K03644/K03801/K08281/K08973/K08679/K01497/K03181/K03473/K00768/K02231/K00643/K03186/K03182/K03750/K09882/K09883/K13940/K01053/K00230/K01664/K01845/K02492/K02496/K02858/K03184/K03472/K03831/K08310/K18800/K19222/K01579/…	100	-13.3121	-14.0821	100	Biosynthesis of cofactors
ko01320	ko01320	10/828	2228-11-01	0.909091	2.4462	3.69703	0.00035504	0.00457114	0.00392413	K00381/K00390/K00957/K00380/K00956/K00955/K00860/K08357/K08358/K08359	10	-15.7934	-16.1832	10	Sulfur cycle
ko00190	ko00190	35/828	60/2228	0.583333	1.56965	3.43924	0.000593649	0.00679398	0.00583234	K02117/K02118/K02119/K02120/K02122/K02123/K02124/K02121/K02297/K02298/K02299/K02300/K00242/K13378/K00239/K00240/K00335/K00245/K00246/K00247/K00330/K00331/K00337/K00339/K00340/K00341/K00342/K00343/K00241/K00411/K00412/K00413/K00338/K06019/K02274	35	-3.50547	-13.9277	35	Oxidative phosphorylation
ko00020	ko00020	24/828	38/2228	0.631579	1.69947	3.34386	0.000928242	0.0095609	0.00820762	K00116/K00024/K01610/K00164/K00658/K01676/K00242/K01682/K00239/K00240/K01902/K01903/K00245/K00246/K00247/K01659/K00163/K00241/K00174/K00175/K01677/K01678/K00176/K00177	24	-9.20915	-14.0674	24	Citrate cycle (TCA cycle)
Foragers vs Nurses - Both Species
ID	Description	GeneRatio	BgRatio	RichFactor	FoldEnrichment	zScore	pvalue	p.adjust	qvalue	geneID	Count	mean_LFC	median_LFC	n_sig_KOs	PathwayName
ko01503	ko01503	23/490	41/2491	0.560976	2.85182	5.91536	2.07242e-07	2.19677e-05	2.07242e-05	K07264/K01406/K10011/K12962/K12963/K13014/K07640/K07771/K07806/K12973/K12975/K19226/K19227/K19228/K19229/K19230/K19236/K07637/K07660/K07662/K06079/K03673/K03760	23	9.6969	10.1638	23	Cationic antimicrobial peptide (CAMP) resistance
ko02010	ko02010	81/490	263/2491	0.307985	1.56569	4.79928	3.39623e-06	0.00018	0.000169811	K10014/K10015/K10016/K10017/K10036/K10037/K10038/K11605/K12368/K12536/K11074/K11075/K11076/K12369/K12370/K12371/K12372/K02062/K05685/K05776/K09996/K09997/K09998/K09999/K10000/K10540/K10541/K10542/K18889/K18890/K19226/K19227/K19228/K19229/K19230/K02063/K02064/K11073/K06858/K06073/K06074/K11604/K11606/K11607/K09971/K13894/K13895/K13896/K13893/K18104/K05845/K02042/K02041/K07122/K11051/K10111/K10010/…	81	6.55794	7.92019	81	ABC transporters
ko03070	ko03070	26/490	62/2491	0.419355	2.13186	4.46529	3.95398e-05	0.00139707	0.00131799	K04058/K13301/K11903/K11907/K11891/K11892/K11906/K02452/K11904/K02458/K02455/K02453/K02459/K02460/K02461/K03222/K03225/K03226/K03227/K03228/K03195/K03199/K03229/K03219/K03224/K03230	26	5.78539	5.32316	26	Bacterial secretion system
ko02026	ko02026	18/490	42/2491	0.428571	2.17872	3.81166	0.000454203	0.0120364	0.0113551	K11936/K07677/K07687/K02425/K07648/K07676/K07678/K07689/K07773/K10914/K03087/K03567/K05851/K07638/K07659/K03566/K02402/K02403	18	7.13898	7.82378	18	Biofilm formation - Escherichia coli

## Sheet: Table_S9
From whole data
Larvae, Nurses, Foragers - M. mondury
adonis2(formula = pd_spsm ~ Age, data = as(sample_data(pw_spsm), "data.frame"), permutations = 999)
	Df	SumOfSqs	R2	F	Pr(>F)
Model	2	0.12541	0.39471	1.9563	0.181
Residual	6	0.19233	0.60529
Total	8	0.31774	1
Larvae, Nurses, Foragers - M. capixaba
adonis2(formula = pd_spsc ~ Age, data = as(sample_data(pw_spsc), "data.frame"), permutations = 999)
	Df	SumOfSqs	R2	F	Pr(>F)
Model	2	0.17631	0.4548	3.3368	0.005	**
Residual	8	0.21135	0.5452
Total	10	0.38766	1
Larvae, Workers, Males, Queens - M. mondury
adonis2(formula = pd_cr ~ Caste_merged, data = as(sample_data(pw_cr), "data.frame"), permutations = 999)
	Df	SumOfSqs	R2	F	Pr(>F)
Model	3	0.41466	0.40722	2.9769	0.014	*
Residual	13	0.60361	0.59278
Total	16	1.01827	1
From ACOM-BC filtered data
Larvae, Nurses, Foragers - M. mondury
adonis2(formula = pd_spsm ~ Age, data = as(sample_data(pw_spsm), "data.frame"), permutations = 999)
	Df	SumOfSqs	R2	F	Pr(>F)
Model	2	0.14006	0.39278	1.9405	0.121
Residual	6	0.21652	0.60722
Total	8	0.35657	1
Larvae, Nurses, Foragers - M. capixaba
adonis2(formula = pd_spsc ~ Age, data = as(sample_data(pw_spsc), "data.frame"), permutations = 999)
	Df	SumOfSqs	R2	F	Pr(>F)
Model	2	0.20621	0.50166	4.0266	0.001	***
Residual	8	0.20485	0.49834
Total	10	0.41106	1
Larvae, Workers, Males, Queens - M. mondury
adonis2(formula = pd_cr ~ Caste_merged, data = as(sample_data(pw_cr), "data.frame"), permutations = 999)
	Df	SumOfSqs	R2	F	Pr(>F)
Model	3	0.46007	0.37925	2.6474	0.009	**
Residual	13	0.75305	0.62075
Total	16	1.21313	1

## Sheet: Table_S10
Edges in consensus network						Nodes in consensus network						Number of edges per pathway class				Network statistics
source	target	weight	methods			id	Pathway_Class	Pathway_Superclass	degree			Pathway_class	Edges			Network	Nodes	Edges	Avg_Degree	Density	Avg_Path_Length	Diameter	Transitivity	Modularity
1CMET2-PWY	AEROBACTINSYN-PWY	1	SparCC			1CMET2-PWY	Cofactor, Prosthetic Group, Electron Carrier, and Vitamin Biosynthesis	Biosynthesis	75			Adenosylcobalamin biosynthesis II (aerobic)	13			SpiecEasi	104	169	3.25	0.0315534	NA	NA	0.16318	0.645216
1CMET2-PWY	ALL-CHORISMATE-PWY	1	SparCC			3-HYDROXYPHENYLACETATE-DEGRADATION-PWY	Aromatic Compound Degradation	Degradation/Utilization/Assimilation	27			Alcohol Degradation	56			SparCC	104	2666	51.2692	0.49776	1.50467	3	0.702331	0.139508
1CMET2-PWY	ANAEROFRUCAT-PWY	1	SparCC			AEROBACTINSYN-PWY	Secondary Metabolite Biosynthesis	Biosynthesis	52			Aldehyde Degradation	19
1CMET2-PWY	ANAGLYCOLYSIS-PWY	1	SparCC			ALL-CHORISMATE-PWY	superpathway of chorismate metabolism	Superpathways	47			Amine and Polyamine Biosynthesis	92
1CMET2-PWY	ARG+POLYAMINE-SYN	1	SparCC			ANAEROFRUCAT-PWY	Fermentation	Generation of Precursor Metabolite and Energy	47			Amine and Polyamine Degradation	134
1CMET2-PWY	ARGSYN-PWY	2	SpiecEasi,SparCC			ANAGLYCOLYSIS-PWY	Glycolysis	Generation of Precursor Metabolite and Energy	76			Amino Acid Biosynthesis	833
1CMET2-PWY	ARGSYNBSUB-PWY	1	SparCC			ARG+POLYAMINE-SYN	Amine and Polyamine Biosynthesis	Biosynthesis	64			Amino Acid Degradation	238
1CMET2-PWY	ARO-PWY	1	SparCC			ARGDEG-PWY	Amino Acid Degradation	Degradation/Utilization/Assimilation	32			Aromatic Compound Biosynthesis	75
1CMET2-PWY	ASPASN-PWY	1	SparCC			ARGORNPROST-PWY	Amino Acid Degradation	Degradation/Utilization/Assimilation	49			Aromatic Compound Degradation	285
1CMET2-PWY	AST-PWY	1	SparCC			ARGSYN-PWY	Amino Acid Biosynthesis	Biosynthesis	78			C1 Compound Utilization and Assimilation	99
1CMET2-PWY	BIOTIN-BIOSYNTHESIS-PWY	2	SpiecEasi,SparCC			ARGSYNBSUB-PWY	Amino Acid Biosynthesis	Biosynthesis	77			Carbohydrate Biosynthesis	289
1CMET2-PWY	BRANCHED-CHAIN-AA-SYN-PWY	1	SparCC			ARO-PWY	Aromatic Compound Biosynthesis	Biosynthesis	75			Carbohydrate Degradation	124
1CMET2-PWY	CALVIN-PWY	1	SparCC			ASPASN-PWY	Amino Acid Biosynthesis	Biosynthesis	68			Cell Structure Biosynthesis	176
1CMET2-PWY	CHLOROPHYLL-SYN	1	SparCC			AST-PWY	Amino Acid Degradation	Degradation/Utilization/Assimilation	58			Cofactor, Prosthetic Group, Electron Carrier, and Vitamin Biosynthesis	676
1CMET2-PWY	COA-PWY	2	SpiecEasi,SparCC			BIOTIN-BIOSYNTHESIS-PWY	Cofactor, Prosthetic Group, Electron Carrier, and Vitamin Biosynthesis	Biosynthesis	62			Degradation/Utilization/Assimilation - Other	34
1CMET2-PWY	COLANSYN-PWY	1	SparCC			BRANCHED-CHAIN-AA-SYN-PWY	Amino Acid Biosynthesis	Biosynthesis	68			Fatty Acid and Lipid Biosynthesis	143
1CMET2-PWY	COMPLETE-ARO-PWY	1	SparCC			CALVIN-PWY	C1 Compound Utilization and Assimilation	Degradation/Utilization/Assimilation	58			Fatty Acid and Lipid Degradation	120
1CMET2-PWY	CRNFORCAT-PWY	1	SparCC			CATECHOL-ORTHO-CLEAVAGE-PWY	Aromatic Compound Degradation	Degradation/Utilization/Assimilation	27			Fermentation	404
1CMET2-PWY	DAPLYSINESYN-PWY	1	SparCC			CENTFERM-PWY	Fermentation	Generation of Precursor Metabolite and Energy	15			Glycan Biosynthesis	73
1CMET2-PWY	DENOVOPURINE2-PWY	1	SparCC			CHLOROPHYLL-SYN	Cofactor, Prosthetic Group, Electron Carrier, and Vitamin Biosynthesis	Biosynthesis	60			Glycolysis	133
1CMET2-PWY	DHGLUCONATE-PYR-CAT-PWY	1	SparCC			COA-PWY	Cofactor, Prosthetic Group, Electron Carrier, and Vitamin Biosynthesis	Biosynthesis	76			Glyoxylate cycle	42
1CMET2-PWY	DTDPRHAMSYN-PWY	1	SparCC			COBALSYN-PWY	Cofactor, Prosthetic Group, Electron Carrier, and Vitamin Biosynthesis	Biosynthesis	32			Inorganic Nutrient Metabolism	29
1CMET2-PWY	ECASYN-PWY	1	SparCC			COLANSYN-PWY	Carbohydrate Biosynthesis	Biosynthesis	62			Nucleoside and Nucleotide Biosynthesis	49
1CMET2-PWY	ENTBACSYN-PWY	1	SparCC			COMPLETE-ARO-PWY	Amino Acid Biosynthesis	Biosynthesis	74			Nucleoside and Nucleotide Degradation	20
1CMET2-PWY	FAO-PWY	1	SparCC			CRNFORCAT-PWY	Amine and Polyamine Degradation	Degradation/Utilization/Assimilation	57			Pentose Phosphate Pathways	75
1CMET2-PWY	FASYN-ELONG-PWY	1	SparCC			DAPLYSINESYN-PWY	Amino Acid Biosynthesis	Biosynthesis	80			Polymeric Compound Degradation	69
1CMET2-PWY	FASYN-INITIAL-PWY	1	SparCC			DENITRIFICATION-PWY	Inorganic Nutrient Metabolism	Degradation/Utilization/Assimilation	29			Respiration	65
1CMET2-PWY	FOLSYN-PWY	1	SparCC			DENOVOPURINE2-PWY	Nucleoside and Nucleotide Biosynthesis	Biosynthesis	49			Secondary Metabolite Biosynthesis	149
1CMET2-PWY	FUC-RHAMCAT-PWY	1	SparCC			DHGLUCONATE-PYR-CAT-PWY	Secondary Metabolite Degradation	Degradation/Utilization/Assimilation	41			Secondary Metabolite Degradation	312
1CMET2-PWY	FUCCAT-PWY	1	SparCC			DTDPRHAMSYN-PWY	Carbohydrate Biosynthesis	Biosynthesis	82			Superpathway of chorismate metabolism	47
1CMET2-PWY	GALACT-GLUCUROCAT-PWY	1	SparCC			ECASYN-PWY	Cell Structure Biosynthesis	Biosynthesis	55			Superpathway of D-glucarate and D-galactarate degradation	29
1CMET2-PWY	GALACTUROCAT-PWY	1	SparCC			ENTBACSYN-PWY	Secondary Metabolite Biosynthesis	Biosynthesis	44			Superpathway of fucose and rhamnose degradation	44
1CMET2-PWY	GALLATE-DEGRADATION-II-PWY	1	SparCC			FAO-PWY	Fatty Acid and Lipid Degradation	Degradation/Utilization/Assimilation	59			Superpathway of glycolysis and the Entner-Doudoroff pathway	60
1CMET2-PWY	GLCMANNANAUT-PWY	1	SparCC			FASYN-ELONG-PWY	Fatty Acid and Lipid Biosynthesis	Biosynthesis	42			Superpathway of glycolysis, pyruvate dehydrogenase, TCA, and glyoxylate bypass	71
1CMET2-PWY	GLUCONEO-PWY	1	SparCC			FASYN-INITIAL-PWY	Fatty Acid and Lipid Biosynthesis	Biosynthesis	50			Superpathway of hexuronide and hexuronate degradation	59
1CMET2-PWY	GLUCOSE1PMETAB-PWY	1	SparCC			FERMENTATION-PWY	Fermentation	Generation of Precursor Metabolite and Energy	41			Superpathway of S-adenosyl-L-methionine biosynthesis	68
1CMET2-PWY	GLUCUROCAT-PWY	1	SparCC			FOLSYN-PWY	Cofactor, Prosthetic Group, Electron Carrier, and Vitamin Biosynthesis	Biosynthesis	52			TCA cycle	42
1CMET2-PWY	GLUTORN-PWY	1	SparCC			FUC-RHAMCAT-PWY	superpathway of fucose and rhamnose degradation	Superpathways	44
1CMET2-PWY	GLYCOCAT-PWY	1	SparCC			FUCCAT-PWY	Carbohydrate Degradation	Degradation/Utilization/Assimilation	42
1CMET2-PWY	GLYCOGENSYNTH-PWY	1	SparCC			GALACT-GLUCUROCAT-PWY	superpathway of hexuronide and hexuronate degradation	Superpathways	59
1CMET2-PWY	GLYCOL-GLYOXDEG-PWY	1	SparCC			GALACTARDEG-PWY	Secondary Metabolite Degradation	Degradation/Utilization/Assimilation	27
1CMET2-PWY	GLYCOLYSIS	1	SparCC			GALACTUROCAT-PWY	Secondary Metabolite Degradation	Degradation/Utilization/Assimilation	62
1CMET2-PWY	GLYCOLYSIS-E-D	1	SparCC			GALLATE-DEGRADATION-I-PWY	Aromatic Compound Degradation	Degradation/Utilization/Assimilation	38
1CMET2-PWY	GLYCOLYSIS-TCA-GLYOX-BYPASS	1	SparCC			GALLATE-DEGRADATION-II-PWY	Aromatic Compound Degradation	Degradation/Utilization/Assimilation	50
1CMET2-PWY	GLYOXYLATE-BYPASS	1	SparCC			GLCMANNANAUT-PWY	Amine and Polyamine Degradation	Degradation/Utilization/Assimilation	47
1CMET2-PWY	HCAMHPDEG-PWY	1	SparCC			GLUCARDEG-PWY	Secondary Metabolite Degradation	Degradation/Utilization/Assimilation	27
1CMET2-PWY	HEME-BIOSYNTHESIS-II	1	SparCC			GLUCARGALACTSUPER-PWY	superpathway of D-glucarate and D-galactarate degradation	Superpathways	29
1CMET2-PWY	HEMESYN2-PWY	1	SparCC			GLUCONEO-PWY	Carbohydrate Biosynthesis	Biosynthesis	60
1CMET2-PWY	HEXITOLDEGSUPER-PWY	1	SparCC			GLUCOSE1PMETAB-PWY	Carbohydrate Degradation	Degradation/Utilization/Assimilation	62
1CMET2-PWY	HISTSYN-PWY	1	SparCC			GLUCUROCAT-PWY	Secondary Metabolite Degradation	Degradation/Utilization/Assimilation	63
1CMET2-PWY	HOMOSER-METSYN-PWY	1	SparCC			GLUTORN-PWY	Amino Acid Biosynthesis	Biosynthesis	67
1CMET2-PWY	HSERMETANA-PWY	1	SparCC			GLYCOCAT-PWY	Polymeric Compound Degradation	Degradation/Utilization/Assimilation	69
1CMET2-PWY	ILEUSYN-PWY	1	SparCC			GLYCOGENSYNTH-PWY	Glycan Biosynthesis	Glycan Pathways	73
1CMET2-PWY	KDO-NAGLIPASYN-PWY	1	SparCC			GLYCOL-GLYOXDEG-PWY	Alcohol Degradation	Degradation/Utilization/Assimilation	41
1CMET2-PWY	KETOGLUCONMET-PWY	1	SparCC			GLYCOLYSIS	Glycolysis	Generation of Precursor Metabolite and Energy	57
1CMET2-PWY	LIPASYN-PWY	1	SparCC			GLYCOLYSIS-E-D	superpathway of glycolysis and the Entner-Doudoroff pathway	Superpathways	60
1CMET2-PWY	LPSSYN-PWY	1	SparCC			GLYCOLYSIS-TCA-GLYOX-BYPASS	superpathway of glycolysis, pyruvate dehydrogenase, TCA, and glyoxylate bypass	Superpathways	71
1CMET2-PWY	MET-SAM-PWY	1	SparCC			GLYOXYLATE-BYPASS	glyoxylate cycle	Generation of Precursor Metabolite and Energy	42
1CMET2-PWY	METH-ACETATE-PWY	1	SparCC			GOLPDLCAT-PWY	Alcohol Degradation	Degradation/Utilization/Assimilation	15
1CMET2-PWY	NAD-BIOSYNTHESIS-II	1	SparCC			HCAMHPDEG-PWY	Aromatic Compound Degradation	Degradation/Utilization/Assimilation	60
1CMET2-PWY	NAGLIPASYN-PWY	1	SparCC			HEME-BIOSYNTHESIS-II	Cofactor, Prosthetic Group, Electron Carrier, and Vitamin Biosynthesis	Biosynthesis	47
1CMET2-PWY	NONMEVIPP-PWY	1	SparCC			HEMESYN2-PWY	Cofactor, Prosthetic Group, Electron Carrier, and Vitamin Biosynthesis	Biosynthesis	45
1CMET2-PWY	NONOXIPENT-PWY	1	SparCC			HEXITOLDEGSUPER-PWY	Secondary Metabolite Degradation	Degradation/Utilization/Assimilation	60
1CMET2-PWY	OANTIGEN-PWY	1	SparCC			HISDEG-PWY	Amino Acid Degradation	Degradation/Utilization/Assimilation	29
1CMET2-PWY	P122-PWY	1	SparCC			HISTSYN-PWY	Amino Acid Biosynthesis	Biosynthesis	66
1CMET2-PWY	P124-PWY	1	SparCC			HOMOSER-METSYN-PWY	Amino Acid Biosynthesis	Biosynthesis	63
1CMET2-PWY	P125-PWY	1	SparCC			HSERMETANA-PWY	Amino Acid Biosynthesis	Biosynthesis	60
1CMET2-PWY	P161-PWY	1	SparCC			ILEUSYN-PWY	Amino Acid Biosynthesis	Biosynthesis	68
1CMET2-PWY	P162-PWY	1	SparCC			KDO-NAGLIPASYN-PWY	Cell Structure Biosynthesis	Biosynthesis	64
1CMET2-PWY	P163-PWY	1	SparCC			KETOGLUCONMET-PWY	Secondary Metabolite Degradation	Degradation/Utilization/Assimilation	32
1CMET2-PWY	P221-PWY	1	SparCC			LACTOSECAT-PWY	Carbohydrate Degradation	Degradation/Utilization/Assimilation	20
1CMET2-PWY	P23-PWY	1	SparCC			LEU-DEG2-PWY	Amino Acid Degradation	Degradation/Utilization/Assimilation	39
1CMET2-PWY	P241-PWY	1	SparCC			LIPASYN-PWY	Fatty Acid and Lipid Degradation	Degradation/Utilization/Assimilation	61
1CMET2-PWY	P261-PWY	1	SparCC			LPSSYN-PWY	Fatty Acid and Lipid Biosynthesis	Biosynthesis	51
1CMET2-PWY	P4-PWY	1	SparCC			MET-SAM-PWY	superpathway of S-adenosyl-L-methionine biosynthesis	Superpathways	68
3-HYDROXYPHENYLACETATE-DEGRADATION-PWY	ALL-CHORISMATE-PWY	1	SparCC			METH-ACETATE-PWY	Respiration	Generation of Precursor Metabolite and Energy	65
3-HYDROXYPHENYLACETATE-DEGRADATION-PWY	ANAEROFRUCAT-PWY	1	SparCC			METHGLYUT-PWY	Aldehyde Degradation	Degradation/Utilization/Assimilation	19
3-HYDROXYPHENYLACETATE-DEGRADATION-PWY	ARGDEG-PWY	2	SpiecEasi,SparCC			METHYLGALLATE-DEGRADATION-PWY	Aromatic Compound Degradation	Degradation/Utilization/Assimilation	28
3-HYDROXYPHENYLACETATE-DEGRADATION-PWY	ARGORNPROST-PWY	1	SparCC			NAD-BIOSYNTHESIS-II	Cofactor, Prosthetic Group, Electron Carrier, and Vitamin Biosynthesis	Biosynthesis	66
3-HYDROXYPHENYLACETATE-DEGRADATION-PWY	CRNFORCAT-PWY	1	SparCC			NADSYN-PWY	Cofactor, Prosthetic Group, Electron Carrier, and Vitamin Biosynthesis	Biosynthesis	32
3-HYDROXYPHENYLACETATE-DEGRADATION-PWY	DENITRIFICATION-PWY	1	SparCC			NAGLIPASYN-PWY	Cell Structure Biosynthesis	Biosynthesis	57
3-HYDROXYPHENYLACETATE-DEGRADATION-PWY	DTDPRHAMSYN-PWY	1	SparCC			NONMEVIPP-PWY	Secondary Metabolite Biosynthesis	Biosynthesis	53
3-HYDROXYPHENYLACETATE-DEGRADATION-PWY	ECASYN-PWY	1	SparCC			NONOXIPENT-PWY	Pentose Phosphate Pathways	Generation of Precursor Metabolite and Energy	75
3-HYDROXYPHENYLACETATE-DEGRADATION-PWY	ENTBACSYN-PWY	2	SpiecEasi,SparCC			OANTIGEN-PWY	Carbohydrate Biosynthesis	Biosynthesis	85
3-HYDROXYPHENYLACETATE-DEGRADATION-PWY	FUC-RHAMCAT-PWY	1	SparCC			ORNARGDEG-PWY	Amino Acid Degradation	Degradation/Utilization/Assimilation	31
3-HYDROXYPHENYLACETATE-DEGRADATION-PWY	GALACTARDEG-PWY	1	SparCC			ORNDEG-PWY	Amine and Polyamine Degradation	Degradation/Utilization/Assimilation	30
3-HYDROXYPHENYLACETATE-DEGRADATION-PWY	GLUCARDEG-PWY	1	SparCC			P101-PWY	Amine and Polyamine Biosynthesis	Biosynthesis	28
3-HYDROXYPHENYLACETATE-DEGRADATION-PWY	GLUCARGALACTSUPER-PWY	1	SparCC			P105-PWY	TCA cycle	Generation of Precursor Metabolite and Energy	42
3-HYDROXYPHENYLACETATE-DEGRADATION-PWY	GLYCOL-GLYOXDEG-PWY	1	SparCC			P108-PWY	Fermentation	Generation of Precursor Metabolite and Energy	25
3-HYDROXYPHENYLACETATE-DEGRADATION-PWY	GLYCOLYSIS	1	SparCC			P122-PWY	Fermentation	Generation of Precursor Metabolite and Energy	39
3-HYDROXYPHENYLACETATE-DEGRADATION-PWY	KETOGLUCONMET-PWY	1	SparCC			P124-PWY	Fermentation	Generation of Precursor Metabolite and Energy	40
3-HYDROXYPHENYLACETATE-DEGRADATION-PWY	LACTOSECAT-PWY	1	SparCC			P125-PWY	Fermentation	Generation of Precursor Metabolite and Energy	37
3-HYDROXYPHENYLACETATE-DEGRADATION-PWY	LEU-DEG2-PWY	1	SparCC			P161-PWY	Fermentation	Generation of Precursor Metabolite and Energy	68
3-HYDROXYPHENYLACETATE-DEGRADATION-PWY	LPSSYN-PWY	1	SparCC			P162-PWY	Fermentation	Generation of Precursor Metabolite and Energy	29
3-HYDROXYPHENYLACETATE-DEGRADATION-PWY	METHGLYUT-PWY	1	SparCC			P163-PWY	Fermentation	Generation of Precursor Metabolite and Energy	63
3-HYDROXYPHENYLACETATE-DEGRADATION-PWY	NAD-BIOSYNTHESIS-II	1	SparCC			P164-PWY	Nucleoside and Nucleotide Degradation	Degradation/Utilization/Assimilation	20
3-HYDROXYPHENYLACETATE-DEGRADATION-PWY	OANTIGEN-PWY	1	SparCC			P184-PWY	Aromatic Compound Degradation	Degradation/Utilization/Assimilation	30
3-HYDROXYPHENYLACETATE-DEGRADATION-PWY	ORNARGDEG-PWY	2	SpiecEasi,SparCC			P221-PWY	Degradation/Utilization/Assimilation - Other	Degradation/Utilization/Assimilation	34
3-HYDROXYPHENYLACETATE-DEGRADATION-PWY	ORNDEG-PWY	2	SpiecEasi,SparCC			P23-PWY	C1 Compound Utilization and Assimilation	Degradation/Utilization/Assimilation	41
3-HYDROXYPHENYLACETATE-DEGRADATION-PWY	P108-PWY	1	SparCC			P241-PWY	Cofactor, Prosthetic Group, Electron Carrier, and Vitamin Biosynthesis	Biosynthesis	65
3-HYDROXYPHENYLACETATE-DEGRADATION-PWY	P23-PWY	1	SparCC			P261-PWY	Cofactor, Prosthetic Group, Electron Carrier, and Vitamin Biosynthesis	Biosynthesis	64
3-HYDROXYPHENYLACETATE-DEGRADATION-PWY	P381-PWY	1	SparCC			P281-PWY	Aromatic Compound Degradation	Degradation/Utilization/Assimilation	25
AEROBACTINSYN-PWY	ANAGLYCOLYSIS-PWY	1	SparCC			P381-PWY	adenosylcobalamin biosynthesis II (aerobic)	Superpathways	13
AEROBACTINSYN-PWY	ARG+POLYAMINE-SYN	1	SparCC			P4-PWY	Amino Acid Biosynthesis	Biosynthesis	64
AEROBACTINSYN-PWY	ARGSYN-PWY	1	SparCC
AEROBACTINSYN-PWY	ARGSYNBSUB-PWY	1	SparCC
AEROBACTINSYN-PWY	ARO-PWY	1	SparCC
AEROBACTINSYN-PWY	ASPASN-PWY	1	SparCC
AEROBACTINSYN-PWY	BIOTIN-BIOSYNTHESIS-PWY	1	SparCC
AEROBACTINSYN-PWY	BRANCHED-CHAIN-AA-SYN-PWY	1	SparCC
AEROBACTINSYN-PWY	CALVIN-PWY	1	SparCC
AEROBACTINSYN-PWY	CHLOROPHYLL-SYN	1	SparCC
AEROBACTINSYN-PWY	COA-PWY	1	SparCC
AEROBACTINSYN-PWY	COLANSYN-PWY	1	SparCC
AEROBACTINSYN-PWY	COMPLETE-ARO-PWY	1	SparCC
AEROBACTINSYN-PWY	DAPLYSINESYN-PWY	1	SparCC
AEROBACTINSYN-PWY	DENOVOPURINE2-PWY	1	SparCC
AEROBACTINSYN-PWY	DHGLUCONATE-PYR-CAT-PWY	1	SparCC
AEROBACTINSYN-PWY	DTDPRHAMSYN-PWY	1	SparCC
AEROBACTINSYN-PWY	FAO-PWY	1	SparCC
AEROBACTINSYN-PWY	FASYN-ELONG-PWY	1	SparCC
AEROBACTINSYN-PWY	FOLSYN-PWY	1	SparCC
AEROBACTINSYN-PWY	FUCCAT-PWY	1	SparCC
AEROBACTINSYN-PWY	GALACTUROCAT-PWY	1	SparCC
AEROBACTINSYN-PWY	GLCMANNANAUT-PWY	1	SparCC
AEROBACTINSYN-PWY	GLUCONEO-PWY	1	SparCC
AEROBACTINSYN-PWY	GLUCOSE1PMETAB-PWY	1	SparCC
AEROBACTINSYN-PWY	GLUCUROCAT-PWY	1	SparCC
AEROBACTINSYN-PWY	GLUTORN-PWY	1	SparCC
AEROBACTINSYN-PWY	GLYCOCAT-PWY	1	SparCC
AEROBACTINSYN-PWY	GLYCOGENSYNTH-PWY	1	SparCC
AEROBACTINSYN-PWY	GLYCOLYSIS	1	SparCC
AEROBACTINSYN-PWY	GLYCOLYSIS-E-D	1	SparCC
AEROBACTINSYN-PWY	GLYCOLYSIS-TCA-GLYOX-BYPASS	1	SparCC
AEROBACTINSYN-PWY	HCAMHPDEG-PWY	1	SparCC
AEROBACTINSYN-PWY	HEXITOLDEGSUPER-PWY	1	SparCC
AEROBACTINSYN-PWY	HISTSYN-PWY	1	SparCC
AEROBACTINSYN-PWY	HOMOSER-METSYN-PWY	1	SparCC
AEROBACTINSYN-PWY	HSERMETANA-PWY	1	SparCC
AEROBACTINSYN-PWY	ILEUSYN-PWY	1	SparCC
AEROBACTINSYN-PWY	LPSSYN-PWY	1	SparCC
AEROBACTINSYN-PWY	MET-SAM-PWY	1	SparCC
AEROBACTINSYN-PWY	METH-ACETATE-PWY	2	SpiecEasi,SparCC
AEROBACTINSYN-PWY	NAGLIPASYN-PWY	1	SparCC
AEROBACTINSYN-PWY	NONMEVIPP-PWY	1	SparCC
AEROBACTINSYN-PWY	NONOXIPENT-PWY	2	SpiecEasi,SparCC
AEROBACTINSYN-PWY	OANTIGEN-PWY	1	SparCC
AEROBACTINSYN-PWY	P161-PWY	1	SparCC
AEROBACTINSYN-PWY	P163-PWY	2	SpiecEasi,SparCC
AEROBACTINSYN-PWY	P23-PWY	1	SparCC
AEROBACTINSYN-PWY	P241-PWY	1	SparCC
AEROBACTINSYN-PWY	P261-PWY	1	SparCC
AEROBACTINSYN-PWY	P4-PWY	1	SparCC
ALL-CHORISMATE-PWY	ARGDEG-PWY	2	SpiecEasi,SparCC
ALL-CHORISMATE-PWY	ARGSYN-PWY	1	SparCC
ALL-CHORISMATE-PWY	ARGSYNBSUB-PWY	1	SparCC
ALL-CHORISMATE-PWY	ARO-PWY	1	SparCC
ALL-CHORISMATE-PWY	BRANCHED-CHAIN-AA-SYN-PWY	1	SparCC
ALL-CHORISMATE-PWY	CALVIN-PWY	1	SparCC
ALL-CHORISMATE-PWY	COMPLETE-ARO-PWY	1	SparCC
ALL-CHORISMATE-PWY	CRNFORCAT-PWY	1	SparCC
ALL-CHORISMATE-PWY	DAPLYSINESYN-PWY	1	SparCC
ALL-CHORISMATE-PWY	DENITRIFICATION-PWY	1	SparCC
ALL-CHORISMATE-PWY	DHGLUCONATE-PYR-CAT-PWY	1	SparCC
ALL-CHORISMATE-PWY	DTDPRHAMSYN-PWY	1	SparCC
ALL-CHORISMATE-PWY	ECASYN-PWY	1	SparCC
ALL-CHORISMATE-PWY	ENTBACSYN-PWY	1	SparCC
ALL-CHORISMATE-PWY	GALACT-GLUCUROCAT-PWY	1	SparCC
ALL-CHORISMATE-PWY	GALACTARDEG-PWY	1	SparCC
ALL-CHORISMATE-PWY	GALACTUROCAT-PWY	1	SparCC
ALL-CHORISMATE-PWY	GALLATE-DEGRADATION-II-PWY	1	SparCC
ALL-CHORISMATE-PWY	GLUCARDEG-PWY	1	SparCC
ALL-CHORISMATE-PWY	GLUCARGALACTSUPER-PWY	1	SparCC
ALL-CHORISMATE-PWY	GLUCUROCAT-PWY	1	SparCC
ALL-CHORISMATE-PWY	GLUTORN-PWY	1	SparCC
ALL-CHORISMATE-PWY	GLYCOCAT-PWY	1	SparCC
ALL-CHORISMATE-PWY	GLYCOGENSYNTH-PWY	1	SparCC
ALL-CHORISMATE-PWY	HCAMHPDEG-PWY	1	SparCC
ALL-CHORISMATE-PWY	HEXITOLDEGSUPER-PWY	1	SparCC
ALL-CHORISMATE-PWY	HISTSYN-PWY	1	SparCC
ALL-CHORISMATE-PWY	HSERMETANA-PWY	1	SparCC
ALL-CHORISMATE-PWY	ILEUSYN-PWY	1	SparCC
ALL-CHORISMATE-PWY	KDO-NAGLIPASYN-PWY	2	SpiecEasi,SparCC
ALL-CHORISMATE-PWY	KETOGLUCONMET-PWY	2	SpiecEasi,SparCC
ALL-CHORISMATE-PWY	LEU-DEG2-PWY	1	SparCC
ALL-CHORISMATE-PWY	LIPASYN-PWY	1	SparCC
ALL-CHORISMATE-PWY	LPSSYN-PWY	1	SparCC
ALL-CHORISMATE-PWY	METH-ACETATE-PWY	1	SparCC
ALL-CHORISMATE-PWY	NAD-BIOSYNTHESIS-II	1	SparCC
ALL-CHORISMATE-PWY	NADSYN-PWY	1	SparCC
ALL-CHORISMATE-PWY	NONMEVIPP-PWY	1	SparCC
ALL-CHORISMATE-PWY	OANTIGEN-PWY	1	SparCC
ALL-CHORISMATE-PWY	ORNARGDEG-PWY	2	SpiecEasi,SparCC
ALL-CHORISMATE-PWY	ORNDEG-PWY	2	SpiecEasi,SparCC
ALL-CHORISMATE-PWY	P101-PWY	1	SparCC
ALL-CHORISMATE-PWY	P163-PWY	1	SparCC
ALL-CHORISMATE-PWY	P241-PWY	1	SparCC
ALL-CHORISMATE-PWY	P261-PWY	1	SparCC
ANAEROFRUCAT-PWY	ANAGLYCOLYSIS-PWY	1	SparCC
ANAEROFRUCAT-PWY	ARG+POLYAMINE-SYN	1	SparCC
ANAEROFRUCAT-PWY	ARGDEG-PWY	1	SparCC
ANAEROFRUCAT-PWY	ARGORNPROST-PWY	1	SparCC
ANAEROFRUCAT-PWY	ARGSYN-PWY	1	SparCC
ANAEROFRUCAT-PWY	ARGSYNBSUB-PWY	1	SparCC
ANAEROFRUCAT-PWY	ARO-PWY	1	SparCC
ANAEROFRUCAT-PWY	ASPASN-PWY	1	SparCC
ANAEROFRUCAT-PWY	AST-PWY	1	SparCC
ANAEROFRUCAT-PWY	BIOTIN-BIOSYNTHESIS-PWY	1	SparCC
ANAEROFRUCAT-PWY	CALVIN-PWY	1	SparCC
ANAEROFRUCAT-PWY	CATECHOL-ORTHO-CLEAVAGE-PWY	1	SparCC
ANAEROFRUCAT-PWY	CHLOROPHYLL-SYN	1	SparCC
ANAEROFRUCAT-PWY	COA-PWY	1	SparCC
ANAEROFRUCAT-PWY	COLANSYN-PWY	1	SparCC
ANAEROFRUCAT-PWY	COMPLETE-ARO-PWY	1	SparCC
ANAEROFRUCAT-PWY	DAPLYSINESYN-PWY	1	SparCC
ANAEROFRUCAT-PWY	DENOVOPURINE2-PWY	1	SparCC
ANAEROFRUCAT-PWY	DTDPRHAMSYN-PWY	1	SparCC
ANAEROFRUCAT-PWY	FAO-PWY	1	SparCC
ANAEROFRUCAT-PWY	FASYN-ELONG-PWY	1	SparCC
ANAEROFRUCAT-PWY	FERMENTATION-PWY	1	SparCC
ANAEROFRUCAT-PWY	GALACTUROCAT-PWY	1	SparCC
ANAEROFRUCAT-PWY	GLUCOSE1PMETAB-PWY	1	SparCC
ANAEROFRUCAT-PWY	GLUCUROCAT-PWY	1	SparCC
ANAEROFRUCAT-PWY	GLYCOL-GLYOXDEG-PWY	2	SpiecEasi,SparCC
ANAEROFRUCAT-PWY	GLYCOLYSIS	2	SpiecEasi,SparCC
ANAEROFRUCAT-PWY	GLYCOLYSIS-TCA-GLYOX-BYPASS	1	SparCC
ANAEROFRUCAT-PWY	GOLPDLCAT-PWY	1	SparCC
ANAEROFRUCAT-PWY	HISDEG-PWY	1	SparCC
ANAEROFRUCAT-PWY	LPSSYN-PWY	1	SparCC
ANAEROFRUCAT-PWY	METH-ACETATE-PWY	1	SparCC
ANAEROFRUCAT-PWY	METHGLYUT-PWY	1	SparCC
ANAEROFRUCAT-PWY	NAD-BIOSYNTHESIS-II	1	SparCC
ANAEROFRUCAT-PWY	NONOXIPENT-PWY	1	SparCC
ANAEROFRUCAT-PWY	OANTIGEN-PWY	1	SparCC
ANAEROFRUCAT-PWY	ORNARGDEG-PWY	1	SparCC
ANAEROFRUCAT-PWY	P122-PWY	1	SparCC
ANAEROFRUCAT-PWY	P124-PWY	1	SparCC
ANAEROFRUCAT-PWY	P161-PWY	1	SparCC
ANAEROFRUCAT-PWY	P162-PWY	1	SparCC
ANAEROFRUCAT-PWY	P163-PWY	1	SparCC
ANAEROFRUCAT-PWY	P221-PWY	1	SparCC
ANAEROFRUCAT-PWY	P241-PWY	1	SparCC
ANAEROFRUCAT-PWY	P261-PWY	1	SparCC
ANAGLYCOLYSIS-PWY	ARG+POLYAMINE-SYN	1	SparCC
ANAGLYCOLYSIS-PWY	ARGORNPROST-PWY	1	SparCC
ANAGLYCOLYSIS-PWY	ARGSYN-PWY	1	SparCC
ANAGLYCOLYSIS-PWY	ARGSYNBSUB-PWY	1	SparCC
ANAGLYCOLYSIS-PWY	ARO-PWY	1	SparCC
ANAGLYCOLYSIS-PWY	ASPASN-PWY	1	SparCC
ANAGLYCOLYSIS-PWY	AST-PWY	1	SparCC
ANAGLYCOLYSIS-PWY	BIOTIN-BIOSYNTHESIS-PWY	2	SpiecEasi,SparCC
ANAGLYCOLYSIS-PWY	BRANCHED-CHAIN-AA-SYN-PWY	1	SparCC
ANAGLYCOLYSIS-PWY	CALVIN-PWY	1	SparCC
ANAGLYCOLYSIS-PWY	CHLOROPHYLL-SYN	1	SparCC
ANAGLYCOLYSIS-PWY	COA-PWY	2	SpiecEasi,SparCC
ANAGLYCOLYSIS-PWY	COBALSYN-PWY	1	SparCC
ANAGLYCOLYSIS-PWY	COLANSYN-PWY	1	SparCC
ANAGLYCOLYSIS-PWY	COMPLETE-ARO-PWY	1	SparCC
ANAGLYCOLYSIS-PWY	CRNFORCAT-PWY	1	SparCC
ANAGLYCOLYSIS-PWY	DAPLYSINESYN-PWY	1	SparCC
ANAGLYCOLYSIS-PWY	DENOVOPURINE2-PWY	1	SparCC
ANAGLYCOLYSIS-PWY	DHGLUCONATE-PYR-CAT-PWY	1	SparCC
ANAGLYCOLYSIS-PWY	DTDPRHAMSYN-PWY	1	SparCC
ANAGLYCOLYSIS-PWY	ECASYN-PWY	1	SparCC
ANAGLYCOLYSIS-PWY	FAO-PWY	1	SparCC
ANAGLYCOLYSIS-PWY	FASYN-ELONG-PWY	1	SparCC
ANAGLYCOLYSIS-PWY	FASYN-INITIAL-PWY	1	SparCC
ANAGLYCOLYSIS-PWY	FERMENTATION-PWY	1	SparCC
ANAGLYCOLYSIS-PWY	FOLSYN-PWY	1	SparCC
ANAGLYCOLYSIS-PWY	FUC-RHAMCAT-PWY	1	SparCC
ANAGLYCOLYSIS-PWY	FUCCAT-PWY	1	SparCC
ANAGLYCOLYSIS-PWY	GALACT-GLUCUROCAT-PWY	1	SparCC
ANAGLYCOLYSIS-PWY	GALACTUROCAT-PWY	1	SparCC
ANAGLYCOLYSIS-PWY	GALLATE-DEGRADATION-II-PWY	1	SparCC
ANAGLYCOLYSIS-PWY	GLCMANNANAUT-PWY	1	SparCC
ANAGLYCOLYSIS-PWY	GLUCONEO-PWY	1	SparCC
ANAGLYCOLYSIS-PWY	GLUCOSE1PMETAB-PWY	1	SparCC
ANAGLYCOLYSIS-PWY	GLUCUROCAT-PWY	1	SparCC
ANAGLYCOLYSIS-PWY	GLUTORN-PWY	1	SparCC
ANAGLYCOLYSIS-PWY	GLYCOCAT-PWY	1	SparCC
ANAGLYCOLYSIS-PWY	GLYCOGENSYNTH-PWY	1	SparCC
ANAGLYCOLYSIS-PWY	GLYCOL-GLYOXDEG-PWY	1	SparCC
ANAGLYCOLYSIS-PWY	GLYCOLYSIS	1	SparCC
ANAGLYCOLYSIS-PWY	GLYCOLYSIS-E-D	1	SparCC
ANAGLYCOLYSIS-PWY	GLYCOLYSIS-TCA-GLYOX-BYPASS	1	SparCC
ANAGLYCOLYSIS-PWY	GLYOXYLATE-BYPASS	1	SparCC
ANAGLYCOLYSIS-PWY	HCAMHPDEG-PWY	1	SparCC
ANAGLYCOLYSIS-PWY	HEME-BIOSYNTHESIS-II	1	SparCC
ANAGLYCOLYSIS-PWY	HEMESYN2-PWY	1	SparCC
ANAGLYCOLYSIS-PWY	HEXITOLDEGSUPER-PWY	1	SparCC
ANAGLYCOLYSIS-PWY	HISTSYN-PWY	1	SparCC
ANAGLYCOLYSIS-PWY	HOMOSER-METSYN-PWY	1	SparCC
ANAGLYCOLYSIS-PWY	HSERMETANA-PWY	1	SparCC
ANAGLYCOLYSIS-PWY	ILEUSYN-PWY	1	SparCC
ANAGLYCOLYSIS-PWY	KDO-NAGLIPASYN-PWY	1	SparCC
ANAGLYCOLYSIS-PWY	LIPASYN-PWY	1	SparCC
ANAGLYCOLYSIS-PWY	LPSSYN-PWY	1	SparCC
ANAGLYCOLYSIS-PWY	MET-SAM-PWY	1	SparCC
ANAGLYCOLYSIS-PWY	METH-ACETATE-PWY	1	SparCC
ANAGLYCOLYSIS-PWY	NAD-BIOSYNTHESIS-II	1	SparCC
ANAGLYCOLYSIS-PWY	NAGLIPASYN-PWY	1	SparCC
ANAGLYCOLYSIS-PWY	NONMEVIPP-PWY	1	SparCC
ANAGLYCOLYSIS-PWY	NONOXIPENT-PWY	2	SpiecEasi,SparCC
ANAGLYCOLYSIS-PWY	OANTIGEN-PWY	2	SpiecEasi,SparCC
ANAGLYCOLYSIS-PWY	P105-PWY	1	SparCC
ANAGLYCOLYSIS-PWY	P122-PWY	1	SparCC
ANAGLYCOLYSIS-PWY	P124-PWY	1	SparCC
ANAGLYCOLYSIS-PWY	P125-PWY	1	SparCC
ANAGLYCOLYSIS-PWY	P161-PWY	2	SpiecEasi,SparCC
ANAGLYCOLYSIS-PWY	P162-PWY	1	SparCC
ANAGLYCOLYSIS-PWY	P163-PWY	1	SparCC
ANAGLYCOLYSIS-PWY	P221-PWY	1	SparCC
ANAGLYCOLYSIS-PWY	P23-PWY	1	SparCC
ANAGLYCOLYSIS-PWY	P241-PWY	1	SparCC
ANAGLYCOLYSIS-PWY	P261-PWY	1	SparCC
ANAGLYCOLYSIS-PWY	P4-PWY	1	SparCC
ARG+POLYAMINE-SYN	ARGSYN-PWY	1	SparCC
ARG+POLYAMINE-SYN	ARGSYNBSUB-PWY	1	SparCC
ARG+POLYAMINE-SYN	ARO-PWY	1	SparCC
ARG+POLYAMINE-SYN	ASPASN-PWY	1	SparCC
ARG+POLYAMINE-SYN	AST-PWY	1	SparCC
ARG+POLYAMINE-SYN	BIOTIN-BIOSYNTHESIS-PWY	1	SparCC
ARG+POLYAMINE-SYN	BRANCHED-CHAIN-AA-SYN-PWY	1	SparCC
ARG+POLYAMINE-SYN	CALVIN-PWY	1	SparCC
ARG+POLYAMINE-SYN	CHLOROPHYLL-SYN	1	SparCC
ARG+POLYAMINE-SYN	COA-PWY	1	SparCC
ARG+POLYAMINE-SYN	COLANSYN-PWY	2	SpiecEasi,SparCC
ARG+POLYAMINE-SYN	COMPLETE-ARO-PWY	1	SparCC
ARG+POLYAMINE-SYN	CRNFORCAT-PWY	1	SparCC
ARG+POLYAMINE-SYN	DAPLYSINESYN-PWY	1	SparCC
ARG+POLYAMINE-SYN	DENOVOPURINE2-PWY	1	SparCC
ARG+POLYAMINE-SYN	DHGLUCONATE-PYR-CAT-PWY	1	SparCC
ARG+POLYAMINE-SYN	DTDPRHAMSYN-PWY	1	SparCC
ARG+POLYAMINE-SYN	FAO-PWY	1	SparCC
ARG+POLYAMINE-SYN	FASYN-ELONG-PWY	1	SparCC
ARG+POLYAMINE-SYN	FOLSYN-PWY	1	SparCC
ARG+POLYAMINE-SYN	FUC-RHAMCAT-PWY	1	SparCC
ARG+POLYAMINE-SYN	FUCCAT-PWY	1	SparCC
ARG+POLYAMINE-SYN	GALACT-GLUCUROCAT-PWY	1	SparCC
ARG+POLYAMINE-SYN	GALACTUROCAT-PWY	1	SparCC
ARG+POLYAMINE-SYN	GALLATE-DEGRADATION-II-PWY	1	SparCC
ARG+POLYAMINE-SYN	GLCMANNANAUT-PWY	1	SparCC
ARG+POLYAMINE-SYN	GLUCONEO-PWY	2	SpiecEasi,SparCC
ARG+POLYAMINE-SYN	GLUCOSE1PMETAB-PWY	1	SparCC
ARG+POLYAMINE-SYN	GLUCUROCAT-PWY	1	SparCC
ARG+POLYAMINE-SYN	GLUTORN-PWY	1	SparCC
ARG+POLYAMINE-SYN	GLYCOCAT-PWY	1	SparCC
ARG+POLYAMINE-SYN	GLYCOGENSYNTH-PWY	1	SparCC
ARG+POLYAMINE-SYN	GLYCOLYSIS	1	SparCC
ARG+POLYAMINE-SYN	GLYCOLYSIS-E-D	1	SparCC
ARG+POLYAMINE-SYN	GLYCOLYSIS-TCA-GLYOX-BYPASS	1	SparCC
ARG+POLYAMINE-SYN	HCAMHPDEG-PWY	1	SparCC
ARG+POLYAMINE-SYN	HEXITOLDEGSUPER-PWY	1	SparCC
ARG+POLYAMINE-SYN	HISTSYN-PWY	1	SparCC
ARG+POLYAMINE-SYN	HOMOSER-METSYN-PWY	1	SparCC
ARG+POLYAMINE-SYN	HSERMETANA-PWY	1	SparCC
ARG+POLYAMINE-SYN	ILEUSYN-PWY	1	SparCC
ARG+POLYAMINE-SYN	KDO-NAGLIPASYN-PWY	1	SparCC
ARG+POLYAMINE-SYN	LEU-DEG2-PWY	1	SparCC
ARG+POLYAMINE-SYN	LIPASYN-PWY	1	SparCC
ARG+POLYAMINE-SYN	MET-SAM-PWY	1	SparCC
ARG+POLYAMINE-SYN	METH-ACETATE-PWY	2	SpiecEasi,SparCC
ARG+POLYAMINE-SYN	NAD-BIOSYNTHESIS-II	1	SparCC
ARG+POLYAMINE-SYN	NAGLIPASYN-PWY	1	SparCC
ARG+POLYAMINE-SYN	NONMEVIPP-PWY	1	SparCC
ARG+POLYAMINE-SYN	NONOXIPENT-PWY	1	SparCC
ARG+POLYAMINE-SYN	OANTIGEN-PWY	1	SparCC
ARG+POLYAMINE-SYN	P108-PWY	1	SparCC
ARG+POLYAMINE-SYN	P122-PWY	1	SparCC
ARG+POLYAMINE-SYN	P124-PWY	1	SparCC
ARG+POLYAMINE-SYN	P161-PWY	1	SparCC
ARG+POLYAMINE-SYN	P163-PWY	2	SpiecEasi,SparCC
ARG+POLYAMINE-SYN	P23-PWY	1	SparCC
ARG+POLYAMINE-SYN	P241-PWY	1	SparCC
ARG+POLYAMINE-SYN	P261-PWY	1	SparCC
ARG+POLYAMINE-SYN	P4-PWY	1	SparCC
ARGDEG-PWY	ARGORNPROST-PWY	1	SparCC
ARGDEG-PWY	CRNFORCAT-PWY	1	SparCC
ARGDEG-PWY	DENITRIFICATION-PWY	1	SparCC
ARGDEG-PWY	DHGLUCONATE-PYR-CAT-PWY	1	SparCC
ARGDEG-PWY	DTDPRHAMSYN-PWY	1	SparCC
ARGDEG-PWY	ECASYN-PWY	1	SparCC
ARGDEG-PWY	ENTBACSYN-PWY	1	SparCC
ARGDEG-PWY	FUC-RHAMCAT-PWY	1	SparCC
ARGDEG-PWY	FUCCAT-PWY	1	SparCC
ARGDEG-PWY	GALACTARDEG-PWY	1	SparCC
ARGDEG-PWY	GLUCARDEG-PWY	1	SparCC
ARGDEG-PWY	GLUCARGALACTSUPER-PWY	1	SparCC
ARGDEG-PWY	GLYCOLYSIS	1	SparCC
ARGDEG-PWY	HISDEG-PWY	1	SparCC
ARGDEG-PWY	KDO-NAGLIPASYN-PWY	1	SparCC
ARGDEG-PWY	KETOGLUCONMET-PWY	1	SparCC
ARGDEG-PWY	LACTOSECAT-PWY	1	SparCC
ARGDEG-PWY	LEU-DEG2-PWY	1	SparCC
ARGDEG-PWY	LIPASYN-PWY	1	SparCC
ARGDEG-PWY	LPSSYN-PWY	1	SparCC
ARGDEG-PWY	NAD-BIOSYNTHESIS-II	1	SparCC
ARGDEG-PWY	NADSYN-PWY	1	SparCC
ARGDEG-PWY	OANTIGEN-PWY	1	SparCC
ARGDEG-PWY	ORNARGDEG-PWY	2	SpiecEasi,SparCC
ARGDEG-PWY	ORNDEG-PWY	2	SpiecEasi,SparCC
ARGDEG-PWY	P101-PWY	1	SparCC
ARGDEG-PWY	P108-PWY	1	SparCC
ARGDEG-PWY	P23-PWY	1	SparCC
ARGDEG-PWY	P381-PWY	1	SparCC
ARGORNPROST-PWY	ARGSYN-PWY	1	SparCC
ARGORNPROST-PWY	ARGSYNBSUB-PWY	1	SparCC
ARGORNPROST-PWY	ARO-PWY	1	SparCC
ARGORNPROST-PWY	BRANCHED-CHAIN-AA-SYN-PWY	1	SparCC
ARGORNPROST-PWY	COBALSYN-PWY	2	SpiecEasi,SparCC
ARGORNPROST-PWY	COLANSYN-PWY	1	SparCC
ARGORNPROST-PWY	COMPLETE-ARO-PWY	1	SparCC
ARGORNPROST-PWY	DAPLYSINESYN-PWY	1	SparCC
ARGORNPROST-PWY	FASYN-ELONG-PWY	1	SparCC
ARGORNPROST-PWY	FASYN-INITIAL-PWY	1	SparCC
ARGORNPROST-PWY	FERMENTATION-PWY	2	SpiecEasi,SparCC
ARGORNPROST-PWY	FOLSYN-PWY	1	SparCC
ARGORNPROST-PWY	GALACTARDEG-PWY	1	SparCC
ARGORNPROST-PWY	GALLATE-DEGRADATION-I-PWY	1	SparCC
ARGORNPROST-PWY	GLUCARDEG-PWY	1	SparCC
ARGORNPROST-PWY	GLUCARGALACTSUPER-PWY	1	SparCC
ARGORNPROST-PWY	GLUCONEO-PWY	1	SparCC
ARGORNPROST-PWY	GLUTORN-PWY	1	SparCC
ARGORNPROST-PWY	GLYCOCAT-PWY	1	SparCC
ARGORNPROST-PWY	GLYCOGENSYNTH-PWY	1	SparCC
ARGORNPROST-PWY	GLYCOLYSIS	1	SparCC
ARGORNPROST-PWY	GLYCOLYSIS-TCA-GLYOX-BYPASS	1	SparCC
ARGORNPROST-PWY	GLYOXYLATE-BYPASS	1	SparCC
ARGORNPROST-PWY	HEME-BIOSYNTHESIS-II	1	SparCC
ARGORNPROST-PWY	HEMESYN2-PWY	1	SparCC
ARGORNPROST-PWY	HEXITOLDEGSUPER-PWY	1	SparCC
ARGORNPROST-PWY	HISDEG-PWY	2	SpiecEasi,SparCC
ARGORNPROST-PWY	HISTSYN-PWY	1	SparCC
ARGORNPROST-PWY	HOMOSER-METSYN-PWY	1	SparCC
ARGORNPROST-PWY	HSERMETANA-PWY	1	SparCC
ARGORNPROST-PWY	ILEUSYN-PWY	1	SparCC
ARGORNPROST-PWY	LEU-DEG2-PWY	2	SpiecEasi,SparCC
ARGORNPROST-PWY	MET-SAM-PWY	1	SparCC
ARGORNPROST-PWY	METHYLGALLATE-DEGRADATION-PWY	1	SparCC
ARGORNPROST-PWY	NAGLIPASYN-PWY	1	SparCC
ARGORNPROST-PWY	NONMEVIPP-PWY	1	SparCC
ARGORNPROST-PWY	NONOXIPENT-PWY	1	SparCC
ARGORNPROST-PWY	ORNARGDEG-PWY	1	SparCC
ARGORNPROST-PWY	ORNDEG-PWY	1	SparCC
ARGORNPROST-PWY	P105-PWY	1	SparCC
ARGORNPROST-PWY	P108-PWY	1	SparCC
ARGORNPROST-PWY	P122-PWY	1	SparCC
ARGORNPROST-PWY	P184-PWY	1	SparCC
ARGORNPROST-PWY	P23-PWY	1	SparCC
ARGORNPROST-PWY	P4-PWY	1	SparCC
ARGSYN-PWY	ARGSYNBSUB-PWY	2	SpiecEasi,SparCC
ARGSYN-PWY	ARO-PWY	1	SparCC
ARGSYN-PWY	ASPASN-PWY	1	SparCC
ARGSYN-PWY	AST-PWY	1	SparCC
ARGSYN-PWY	BIOTIN-BIOSYNTHESIS-PWY	1	SparCC
ARGSYN-PWY	BRANCHED-CHAIN-AA-SYN-PWY	1	SparCC
ARGSYN-PWY	CALVIN-PWY	1	SparCC
ARGSYN-PWY	CHLOROPHYLL-SYN	1	SparCC
ARGSYN-PWY	COA-PWY	1	SparCC
ARGSYN-PWY	COLANSYN-PWY	1	SparCC
ARGSYN-PWY	COMPLETE-ARO-PWY	1	SparCC
ARGSYN-PWY	CRNFORCAT-PWY	1	SparCC
ARGSYN-PWY	DAPLYSINESYN-PWY	2	SpiecEasi,SparCC
ARGSYN-PWY	DENOVOPURINE2-PWY	1	SparCC
ARGSYN-PWY	DHGLUCONATE-PYR-CAT-PWY	1	SparCC
ARGSYN-PWY	DTDPRHAMSYN-PWY	1	SparCC
ARGSYN-PWY	ECASYN-PWY	1	SparCC
ARGSYN-PWY	ENTBACSYN-PWY	1	SparCC
ARGSYN-PWY	FAO-PWY	1	SparCC
ARGSYN-PWY	FASYN-ELONG-PWY	1	SparCC
ARGSYN-PWY	FASYN-INITIAL-PWY	1	SparCC
ARGSYN-PWY	FERMENTATION-PWY	1	SparCC
ARGSYN-PWY	FOLSYN-PWY	1	SparCC
ARGSYN-PWY	FUC-RHAMCAT-PWY	1	SparCC
ARGSYN-PWY	FUCCAT-PWY	1	SparCC
ARGSYN-PWY	GALACT-GLUCUROCAT-PWY	1	SparCC
ARGSYN-PWY	GALACTUROCAT-PWY	1	SparCC
ARGSYN-PWY	GALLATE-DEGRADATION-II-PWY	1	SparCC
ARGSYN-PWY	GLCMANNANAUT-PWY	1	SparCC
ARGSYN-PWY	GLUCONEO-PWY	1	SparCC
ARGSYN-PWY	GLUCOSE1PMETAB-PWY	1	SparCC
ARGSYN-PWY	GLUCUROCAT-PWY	1	SparCC
ARGSYN-PWY	GLUTORN-PWY	1	SparCC
ARGSYN-PWY	GLYCOCAT-PWY	1	SparCC
ARGSYN-PWY	GLYCOGENSYNTH-PWY	1	SparCC
ARGSYN-PWY	GLYCOL-GLYOXDEG-PWY	1	SparCC
ARGSYN-PWY	GLYCOLYSIS	1	SparCC
ARGSYN-PWY	GLYCOLYSIS-E-D	1	SparCC
ARGSYN-PWY	GLYCOLYSIS-TCA-GLYOX-BYPASS	1	SparCC
ARGSYN-PWY	GLYOXYLATE-BYPASS	1	SparCC
ARGSYN-PWY	HCAMHPDEG-PWY	1	SparCC
ARGSYN-PWY	HEME-BIOSYNTHESIS-II	1	SparCC
ARGSYN-PWY	HEMESYN2-PWY	1	SparCC
ARGSYN-PWY	HEXITOLDEGSUPER-PWY	1	SparCC
ARGSYN-PWY	HISTSYN-PWY	1	SparCC
ARGSYN-PWY	HOMOSER-METSYN-PWY	1	SparCC
ARGSYN-PWY	HSERMETANA-PWY	1	SparCC
ARGSYN-PWY	ILEUSYN-PWY	1	SparCC
ARGSYN-PWY	KDO-NAGLIPASYN-PWY	1	SparCC
ARGSYN-PWY	KETOGLUCONMET-PWY	1	SparCC
ARGSYN-PWY	LIPASYN-PWY	1	SparCC
ARGSYN-PWY	LPSSYN-PWY	1	SparCC
ARGSYN-PWY	MET-SAM-PWY	1	SparCC
ARGSYN-PWY	METH-ACETATE-PWY	1	SparCC
ARGSYN-PWY	NAD-BIOSYNTHESIS-II	1	SparCC
ARGSYN-PWY	NAGLIPASYN-PWY	1	SparCC
ARGSYN-PWY	NONMEVIPP-PWY	1	SparCC
ARGSYN-PWY	NONOXIPENT-PWY	1	SparCC
ARGSYN-PWY	OANTIGEN-PWY	1	SparCC
ARGSYN-PWY	P105-PWY	1	SparCC
ARGSYN-PWY	P122-PWY	1	SparCC
ARGSYN-PWY	P124-PWY	1	SparCC
ARGSYN-PWY	P125-PWY	1	SparCC
ARGSYN-PWY	P161-PWY	1	SparCC
ARGSYN-PWY	P162-PWY	1	SparCC
ARGSYN-PWY	P163-PWY	1	SparCC
ARGSYN-PWY	P221-PWY	1	SparCC
ARGSYN-PWY	P23-PWY	1	SparCC
ARGSYN-PWY	P241-PWY	1	SparCC
ARGSYN-PWY	P261-PWY	1	SparCC
ARGSYN-PWY	P4-PWY	1	SparCC
ARGSYNBSUB-PWY	ARO-PWY	1	SparCC
ARGSYNBSUB-PWY	ASPASN-PWY	1	SparCC
ARGSYNBSUB-PWY	AST-PWY	1	SparCC
ARGSYNBSUB-PWY	BIOTIN-BIOSYNTHESIS-PWY	1	SparCC
ARGSYNBSUB-PWY	BRANCHED-CHAIN-AA-SYN-PWY	1	SparCC
ARGSYNBSUB-PWY	CALVIN-PWY	1	SparCC
ARGSYNBSUB-PWY	CHLOROPHYLL-SYN	1	SparCC
ARGSYNBSUB-PWY	COA-PWY	1	SparCC
ARGSYNBSUB-PWY	COLANSYN-PWY	1	SparCC
ARGSYNBSUB-PWY	COMPLETE-ARO-PWY	2	SpiecEasi,SparCC
ARGSYNBSUB-PWY	CRNFORCAT-PWY	1	SparCC
ARGSYNBSUB-PWY	DAPLYSINESYN-PWY	2	SpiecEasi,SparCC
ARGSYNBSUB-PWY	DENOVOPURINE2-PWY	1	SparCC
ARGSYNBSUB-PWY	DHGLUCONATE-PYR-CAT-PWY	1	SparCC
ARGSYNBSUB-PWY	DTDPRHAMSYN-PWY	1	SparCC
ARGSYNBSUB-PWY	ECASYN-PWY	1	SparCC
ARGSYNBSUB-PWY	ENTBACSYN-PWY	1	SparCC
ARGSYNBSUB-PWY	FAO-PWY	1	SparCC
ARGSYNBSUB-PWY	FASYN-ELONG-PWY	1	SparCC
ARGSYNBSUB-PWY	FASYN-INITIAL-PWY	1	SparCC
ARGSYNBSUB-PWY	FERMENTATION-PWY	1	SparCC
ARGSYNBSUB-PWY	FOLSYN-PWY	1	SparCC
ARGSYNBSUB-PWY	FUC-RHAMCAT-PWY	1	SparCC
ARGSYNBSUB-PWY	FUCCAT-PWY	1	SparCC
ARGSYNBSUB-PWY	GALACT-GLUCUROCAT-PWY	1	SparCC
ARGSYNBSUB-PWY	GALACTUROCAT-PWY	1	SparCC
ARGSYNBSUB-PWY	GALLATE-DEGRADATION-I-PWY	1	SparCC
ARGSYNBSUB-PWY	GALLATE-DEGRADATION-II-PWY	1	SparCC
ARGSYNBSUB-PWY	GLCMANNANAUT-PWY	1	SparCC
ARGSYNBSUB-PWY	GLUCONEO-PWY	1	SparCC
ARGSYNBSUB-PWY	GLUCOSE1PMETAB-PWY	1	SparCC
ARGSYNBSUB-PWY	GLUCUROCAT-PWY	1	SparCC
ARGSYNBSUB-PWY	GLUTORN-PWY	1	SparCC
ARGSYNBSUB-PWY	GLYCOCAT-PWY	1	SparCC
ARGSYNBSUB-PWY	GLYCOGENSYNTH-PWY	1	SparCC
ARGSYNBSUB-PWY	GLYCOL-GLYOXDEG-PWY	1	SparCC
ARGSYNBSUB-PWY	GLYCOLYSIS	1	SparCC
ARGSYNBSUB-PWY	GLYCOLYSIS-E-D	1	SparCC
ARGSYNBSUB-PWY	GLYCOLYSIS-TCA-GLYOX-BYPASS	1	SparCC
ARGSYNBSUB-PWY	GLYOXYLATE-BYPASS	1	SparCC
ARGSYNBSUB-PWY	HCAMHPDEG-PWY	1	SparCC
ARGSYNBSUB-PWY	HEME-BIOSYNTHESIS-II	1	SparCC
ARGSYNBSUB-PWY	HEMESYN2-PWY	1	SparCC
ARGSYNBSUB-PWY	HEXITOLDEGSUPER-PWY	1	SparCC
ARGSYNBSUB-PWY	HISTSYN-PWY	1	SparCC
ARGSYNBSUB-PWY	HOMOSER-METSYN-PWY	1	SparCC
ARGSYNBSUB-PWY	HSERMETANA-PWY	1	SparCC
ARGSYNBSUB-PWY	ILEUSYN-PWY	2	SpiecEasi,SparCC
ARGSYNBSUB-PWY	KDO-NAGLIPASYN-PWY	1	SparCC
ARGSYNBSUB-PWY	LIPASYN-PWY	1	SparCC
ARGSYNBSUB-PWY	LPSSYN-PWY	1	SparCC
ARGSYNBSUB-PWY	MET-SAM-PWY	1	SparCC
ARGSYNBSUB-PWY	METH-ACETATE-PWY	1	SparCC
ARGSYNBSUB-PWY	NAD-BIOSYNTHESIS-II	1	SparCC
ARGSYNBSUB-PWY	NAGLIPASYN-PWY	1	SparCC
ARGSYNBSUB-PWY	NONMEVIPP-PWY	1	SparCC
ARGSYNBSUB-PWY	NONOXIPENT-PWY	1	SparCC
ARGSYNBSUB-PWY	OANTIGEN-PWY	1	SparCC
ARGSYNBSUB-PWY	P105-PWY	1	SparCC
ARGSYNBSUB-PWY	P122-PWY	1	SparCC
ARGSYNBSUB-PWY	P124-PWY	1	SparCC
ARGSYNBSUB-PWY	P125-PWY	1	SparCC
ARGSYNBSUB-PWY	P161-PWY	1	SparCC
ARGSYNBSUB-PWY	P162-PWY	1	SparCC
ARGSYNBSUB-PWY	P163-PWY	1	SparCC
ARGSYNBSUB-PWY	P184-PWY	1	SparCC
ARGSYNBSUB-PWY	P241-PWY	1	SparCC
ARGSYNBSUB-PWY	P261-PWY	1	SparCC
ARGSYNBSUB-PWY	P4-PWY	1	SparCC
ARO-PWY	ASPASN-PWY	1	SparCC
ARO-PWY	AST-PWY	1	SparCC
ARO-PWY	BIOTIN-BIOSYNTHESIS-PWY	1	SparCC
ARO-PWY	BRANCHED-CHAIN-AA-SYN-PWY	1	SparCC
ARO-PWY	CALVIN-PWY	1	SparCC
ARO-PWY	CHLOROPHYLL-SYN	1	SparCC
ARO-PWY	COA-PWY	1	SparCC
ARO-PWY	COLANSYN-PWY	1	SparCC
ARO-PWY	COMPLETE-ARO-PWY	2	SpiecEasi,SparCC
ARO-PWY	CRNFORCAT-PWY	1	SparCC
ARO-PWY	DAPLYSINESYN-PWY	1	SparCC
ARO-PWY	DENOVOPURINE2-PWY	1	SparCC
ARO-PWY	DHGLUCONATE-PYR-CAT-PWY	1	SparCC
ARO-PWY	DTDPRHAMSYN-PWY	1	SparCC
ARO-PWY	ECASYN-PWY	1	SparCC
ARO-PWY	ENTBACSYN-PWY	1	SparCC
ARO-PWY	FAO-PWY	1	SparCC
ARO-PWY	FASYN-ELONG-PWY	1	SparCC
ARO-PWY	FASYN-INITIAL-PWY	1	SparCC
ARO-PWY	FERMENTATION-PWY	1	SparCC
ARO-PWY	FOLSYN-PWY	1	SparCC
ARO-PWY	GALACT-GLUCUROCAT-PWY	1	SparCC
ARO-PWY	GALACTUROCAT-PWY	1	SparCC
ARO-PWY	GALLATE-DEGRADATION-II-PWY	1	SparCC
ARO-PWY	GLCMANNANAUT-PWY	1	SparCC
ARO-PWY	GLUCONEO-PWY	1	SparCC
ARO-PWY	GLUCOSE1PMETAB-PWY	1	SparCC
ARO-PWY	GLUCUROCAT-PWY	1	SparCC
ARO-PWY	GLUTORN-PWY	1	SparCC
ARO-PWY	GLYCOCAT-PWY	1	SparCC
ARO-PWY	GLYCOGENSYNTH-PWY	1	SparCC
ARO-PWY	GLYCOL-GLYOXDEG-PWY	1	SparCC
ARO-PWY	GLYCOLYSIS	1	SparCC
ARO-PWY	GLYCOLYSIS-E-D	1	SparCC
ARO-PWY	GLYCOLYSIS-TCA-GLYOX-BYPASS	1	SparCC
ARO-PWY	GLYOXYLATE-BYPASS	1	SparCC
ARO-PWY	HCAMHPDEG-PWY	1	SparCC
ARO-PWY	HEME-BIOSYNTHESIS-II	1	SparCC
ARO-PWY	HEMESYN2-PWY	1	SparCC
ARO-PWY	HEXITOLDEGSUPER-PWY	1	SparCC
ARO-PWY	HISTSYN-PWY	1	SparCC
ARO-PWY	HOMOSER-METSYN-PWY	1	SparCC
ARO-PWY	HSERMETANA-PWY	1	SparCC
ARO-PWY	ILEUSYN-PWY	1	SparCC
ARO-PWY	KDO-NAGLIPASYN-PWY	1	SparCC
ARO-PWY	KETOGLUCONMET-PWY	1	SparCC
ARO-PWY	LIPASYN-PWY	1	SparCC
ARO-PWY	LPSSYN-PWY	1	SparCC
ARO-PWY	MET-SAM-PWY	1	SparCC
ARO-PWY	METH-ACETATE-PWY	1	SparCC
ARO-PWY	NAD-BIOSYNTHESIS-II	1	SparCC
ARO-PWY	NAGLIPASYN-PWY	1	SparCC
ARO-PWY	NONMEVIPP-PWY	1	SparCC
ARO-PWY	NONOXIPENT-PWY	1	SparCC
ARO-PWY	OANTIGEN-PWY	1	SparCC
ARO-PWY	P105-PWY	1	SparCC
ARO-PWY	P122-PWY	1	SparCC
ARO-PWY	P124-PWY	1	SparCC
ARO-PWY	P125-PWY	1	SparCC
ARO-PWY	P161-PWY	1	SparCC
ARO-PWY	P163-PWY	1	SparCC
ARO-PWY	P221-PWY	1	SparCC
ARO-PWY	P23-PWY	1	SparCC
ARO-PWY	P241-PWY	1	SparCC
ARO-PWY	P261-PWY	1	SparCC
ARO-PWY	P4-PWY	1	SparCC
ASPASN-PWY	AST-PWY	1	SparCC
ASPASN-PWY	BIOTIN-BIOSYNTHESIS-PWY	1	SparCC
ASPASN-PWY	BRANCHED-CHAIN-AA-SYN-PWY	1	SparCC
ASPASN-PWY	CALVIN-PWY	2	SpiecEasi,SparCC
ASPASN-PWY	CENTFERM-PWY	1	SparCC
ASPASN-PWY	CHLOROPHYLL-SYN	1	SparCC
ASPASN-PWY	COA-PWY	1	SparCC
ASPASN-PWY	COLANSYN-PWY	1	SparCC
ASPASN-PWY	COMPLETE-ARO-PWY	1	SparCC
ASPASN-PWY	DAPLYSINESYN-PWY	1	SparCC
ASPASN-PWY	DENOVOPURINE2-PWY	1	SparCC
ASPASN-PWY	DTDPRHAMSYN-PWY	1	SparCC
ASPASN-PWY	ENTBACSYN-PWY	1	SparCC
ASPASN-PWY	FAO-PWY	1	SparCC
ASPASN-PWY	FASYN-ELONG-PWY	1	SparCC
ASPASN-PWY	FASYN-INITIAL-PWY	1	SparCC
ASPASN-PWY	FERMENTATION-PWY	1	SparCC
ASPASN-PWY	FOLSYN-PWY	1	SparCC
ASPASN-PWY	GALACT-GLUCUROCAT-PWY	1	SparCC
ASPASN-PWY	GALACTUROCAT-PWY	1	SparCC
ASPASN-PWY	GLCMANNANAUT-PWY	1	SparCC
ASPASN-PWY	GLUCONEO-PWY	1	SparCC
ASPASN-PWY	GLUCOSE1PMETAB-PWY	1	SparCC
ASPASN-PWY	GLUCUROCAT-PWY	1	SparCC
ASPASN-PWY	GLUTORN-PWY	1	SparCC
ASPASN-PWY	GLYCOCAT-PWY	1	SparCC
ASPASN-PWY	GLYCOGENSYNTH-PWY	1	SparCC
ASPASN-PWY	GLYCOL-GLYOXDEG-PWY	1	SparCC
ASPASN-PWY	GLYCOLYSIS	1	SparCC
ASPASN-PWY	GLYCOLYSIS-E-D	1	SparCC
ASPASN-PWY	GLYCOLYSIS-TCA-GLYOX-BYPASS	1	SparCC
ASPASN-PWY	GLYOXYLATE-BYPASS	1	SparCC
ASPASN-PWY	HCAMHPDEG-PWY	1	SparCC
ASPASN-PWY	HEME-BIOSYNTHESIS-II	1	SparCC
ASPASN-PWY	HEMESYN2-PWY	1	SparCC
ASPASN-PWY	HEXITOLDEGSUPER-PWY	1	SparCC
ASPASN-PWY	HISTSYN-PWY	1	SparCC
ASPASN-PWY	HOMOSER-METSYN-PWY	1	SparCC
ASPASN-PWY	HSERMETANA-PWY	1	SparCC
ASPASN-PWY	ILEUSYN-PWY	1	SparCC
ASPASN-PWY	KDO-NAGLIPASYN-PWY	1	SparCC
ASPASN-PWY	KETOGLUCONMET-PWY	1	SparCC
ASPASN-PWY	MET-SAM-PWY	1	SparCC
ASPASN-PWY	METH-ACETATE-PWY	1	SparCC
ASPASN-PWY	NAD-BIOSYNTHESIS-II	1	SparCC
ASPASN-PWY	NAGLIPASYN-PWY	1	SparCC
ASPASN-PWY	NONMEVIPP-PWY	1	SparCC
ASPASN-PWY	NONOXIPENT-PWY	1	SparCC
ASPASN-PWY	OANTIGEN-PWY	1	SparCC
ASPASN-PWY	P122-PWY	1	SparCC
ASPASN-PWY	P124-PWY	1	SparCC
ASPASN-PWY	P125-PWY	2	SpiecEasi,SparCC
ASPASN-PWY	P161-PWY	2	SpiecEasi,SparCC
ASPASN-PWY	P163-PWY	1	SparCC
ASPASN-PWY	P221-PWY	1	SparCC
ASPASN-PWY	P23-PWY	1	SparCC
ASPASN-PWY	P241-PWY	1	SparCC
ASPASN-PWY	P261-PWY	1	SparCC
ASPASN-PWY	P281-PWY	1	SparCC
ASPASN-PWY	P4-PWY	2	SpiecEasi,SparCC
AST-PWY	BIOTIN-BIOSYNTHESIS-PWY	1	SparCC
AST-PWY	BRANCHED-CHAIN-AA-SYN-PWY	1	SparCC
AST-PWY	CALVIN-PWY	1	SparCC
AST-PWY	CHLOROPHYLL-SYN	1	SparCC
AST-PWY	COA-PWY	1	SparCC
AST-PWY	COLANSYN-PWY	1	SparCC
AST-PWY	COMPLETE-ARO-PWY	1	SparCC
AST-PWY	DAPLYSINESYN-PWY	1	SparCC
AST-PWY	DENOVOPURINE2-PWY	1	SparCC
AST-PWY	DTDPRHAMSYN-PWY	1	SparCC
AST-PWY	ECASYN-PWY	2	SpiecEasi,SparCC
AST-PWY	FAO-PWY	1	SparCC
AST-PWY	FASYN-ELONG-PWY	1	SparCC
AST-PWY	GALACT-GLUCUROCAT-PWY	1	SparCC
AST-PWY	GALACTUROCAT-PWY	2	SpiecEasi,SparCC
AST-PWY	GALLATE-DEGRADATION-I-PWY	1	SparCC
AST-PWY	GALLATE-DEGRADATION-II-PWY	1	SparCC
AST-PWY	GLUCOSE1PMETAB-PWY	2	SpiecEasi,SparCC
AST-PWY	GLUCUROCAT-PWY	1	SparCC
AST-PWY	GLUTORN-PWY	1	SparCC
AST-PWY	GLYCOGENSYNTH-PWY	1	SparCC
AST-PWY	GLYCOL-GLYOXDEG-PWY	1	SparCC
AST-PWY	GLYCOLYSIS	1	SparCC
AST-PWY	GLYCOLYSIS-TCA-GLYOX-BYPASS	1	SparCC
AST-PWY	HISTSYN-PWY	1	SparCC
AST-PWY	HOMOSER-METSYN-PWY	1	SparCC
AST-PWY	HSERMETANA-PWY	1	SparCC
AST-PWY	ILEUSYN-PWY	1	SparCC
AST-PWY	KDO-NAGLIPASYN-PWY	1	SparCC
AST-PWY	LACTOSECAT-PWY	1	SparCC
AST-PWY	LEU-DEG2-PWY	1	SparCC
AST-PWY	LIPASYN-PWY	1	SparCC
AST-PWY	LPSSYN-PWY	1	SparCC
AST-PWY	MET-SAM-PWY	1	SparCC
AST-PWY	METH-ACETATE-PWY	1	SparCC
AST-PWY	METHYLGALLATE-DEGRADATION-PWY	1	SparCC
AST-PWY	NAD-BIOSYNTHESIS-II	1	SparCC
AST-PWY	NADSYN-PWY	1	SparCC
AST-PWY	NONMEVIPP-PWY	1	SparCC
AST-PWY	NONOXIPENT-PWY	1	SparCC
AST-PWY	OANTIGEN-PWY	1	SparCC
AST-PWY	P161-PWY	1	SparCC
AST-PWY	P162-PWY	1	SparCC
AST-PWY	P163-PWY	1	SparCC
AST-PWY	P164-PWY	2	SpiecEasi,SparCC
AST-PWY	P184-PWY	1	SparCC
AST-PWY	P241-PWY	1	SparCC
AST-PWY	P261-PWY	1	SparCC
AST-PWY	P281-PWY	1	SparCC
AST-PWY	P4-PWY	1	SparCC
BIOTIN-BIOSYNTHESIS-PWY	BRANCHED-CHAIN-AA-SYN-PWY	1	SparCC
BIOTIN-BIOSYNTHESIS-PWY	CALVIN-PWY	1	SparCC
BIOTIN-BIOSYNTHESIS-PWY	CHLOROPHYLL-SYN	1	SparCC
BIOTIN-BIOSYNTHESIS-PWY	COA-PWY	1	SparCC
BIOTIN-BIOSYNTHESIS-PWY	COBALSYN-PWY	1	SparCC
BIOTIN-BIOSYNTHESIS-PWY	COLANSYN-PWY	1	SparCC
BIOTIN-BIOSYNTHESIS-PWY	COMPLETE-ARO-PWY	1	SparCC
BIOTIN-BIOSYNTHESIS-PWY	DAPLYSINESYN-PWY	1	SparCC
BIOTIN-BIOSYNTHESIS-PWY	DENOVOPURINE2-PWY	1	SparCC
BIOTIN-BIOSYNTHESIS-PWY	DTDPRHAMSYN-PWY	1	SparCC
BIOTIN-BIOSYNTHESIS-PWY	ECASYN-PWY	1	SparCC
BIOTIN-BIOSYNTHESIS-PWY	FAO-PWY	2	SpiecEasi,SparCC
BIOTIN-BIOSYNTHESIS-PWY	FASYN-ELONG-PWY	1	SparCC
BIOTIN-BIOSYNTHESIS-PWY	FASYN-INITIAL-PWY	1	SparCC
BIOTIN-BIOSYNTHESIS-PWY	FOLSYN-PWY	1	SparCC
BIOTIN-BIOSYNTHESIS-PWY	GALACTUROCAT-PWY	1	SparCC
BIOTIN-BIOSYNTHESIS-PWY	GALLATE-DEGRADATION-II-PWY	1	SparCC
BIOTIN-BIOSYNTHESIS-PWY	GLUCONEO-PWY	1	SparCC
BIOTIN-BIOSYNTHESIS-PWY	GLUCOSE1PMETAB-PWY	1	SparCC
BIOTIN-BIOSYNTHESIS-PWY	GLUCUROCAT-PWY	1	SparCC
BIOTIN-BIOSYNTHESIS-PWY	GLUTORN-PWY	1	SparCC
BIOTIN-BIOSYNTHESIS-PWY	GLYCOCAT-PWY	1	SparCC
BIOTIN-BIOSYNTHESIS-PWY	GLYCOGENSYNTH-PWY	1	SparCC
BIOTIN-BIOSYNTHESIS-PWY	GLYCOLYSIS	1	SparCC
BIOTIN-BIOSYNTHESIS-PWY	GLYCOLYSIS-E-D	1	SparCC
BIOTIN-BIOSYNTHESIS-PWY	GLYCOLYSIS-TCA-GLYOX-BYPASS	2	SpiecEasi,SparCC
BIOTIN-BIOSYNTHESIS-PWY	GLYOXYLATE-BYPASS	1	SparCC
BIOTIN-BIOSYNTHESIS-PWY	HEME-BIOSYNTHESIS-II	1	SparCC
BIOTIN-BIOSYNTHESIS-PWY	HEMESYN2-PWY	1	SparCC
BIOTIN-BIOSYNTHESIS-PWY	HISTSYN-PWY	1	SparCC
BIOTIN-BIOSYNTHESIS-PWY	HOMOSER-METSYN-PWY	1	SparCC
BIOTIN-BIOSYNTHESIS-PWY	ILEUSYN-PWY	1	SparCC
BIOTIN-BIOSYNTHESIS-PWY	KDO-NAGLIPASYN-PWY	1	SparCC
BIOTIN-BIOSYNTHESIS-PWY	LIPASYN-PWY	1	SparCC
BIOTIN-BIOSYNTHESIS-PWY	MET-SAM-PWY	1	SparCC
BIOTIN-BIOSYNTHESIS-PWY	METH-ACETATE-PWY	1	SparCC
BIOTIN-BIOSYNTHESIS-PWY	NAD-BIOSYNTHESIS-II	1	SparCC
BIOTIN-BIOSYNTHESIS-PWY	NAGLIPASYN-PWY	1	SparCC
BIOTIN-BIOSYNTHESIS-PWY	NONOXIPENT-PWY	1	SparCC
BIOTIN-BIOSYNTHESIS-PWY	OANTIGEN-PWY	1	SparCC
BIOTIN-BIOSYNTHESIS-PWY	P122-PWY	1	SparCC
BIOTIN-BIOSYNTHESIS-PWY	P124-PWY	1	SparCC
BIOTIN-BIOSYNTHESIS-PWY	P125-PWY	1	SparCC
BIOTIN-BIOSYNTHESIS-PWY	P161-PWY	1	SparCC
BIOTIN-BIOSYNTHESIS-PWY	P162-PWY	1	SparCC
BIOTIN-BIOSYNTHESIS-PWY	P163-PWY	2	SpiecEasi,SparCC
BIOTIN-BIOSYNTHESIS-PWY	P184-PWY	1	SparCC
BIOTIN-BIOSYNTHESIS-PWY	P221-PWY	2	SpiecEasi,SparCC
BIOTIN-BIOSYNTHESIS-PWY	P23-PWY	1	SparCC
BIOTIN-BIOSYNTHESIS-PWY	P241-PWY	1	SparCC
BIOTIN-BIOSYNTHESIS-PWY	P261-PWY	2	SpiecEasi,SparCC
BIOTIN-BIOSYNTHESIS-PWY	P4-PWY	1	SparCC
BRANCHED-CHAIN-AA-SYN-PWY	CALVIN-PWY	1	SparCC
BRANCHED-CHAIN-AA-SYN-PWY	CHLOROPHYLL-SYN	1	SparCC
BRANCHED-CHAIN-AA-SYN-PWY	COA-PWY	1	SparCC
BRANCHED-CHAIN-AA-SYN-PWY	COLANSYN-PWY	1	SparCC
BRANCHED-CHAIN-AA-SYN-PWY	COMPLETE-ARO-PWY	1	SparCC
BRANCHED-CHAIN-AA-SYN-PWY	CRNFORCAT-PWY	1	SparCC
BRANCHED-CHAIN-AA-SYN-PWY	DAPLYSINESYN-PWY	1	SparCC
BRANCHED-CHAIN-AA-SYN-PWY	DENOVOPURINE2-PWY	1	SparCC
BRANCHED-CHAIN-AA-SYN-PWY	DHGLUCONATE-PYR-CAT-PWY	1	SparCC
BRANCHED-CHAIN-AA-SYN-PWY	DTDPRHAMSYN-PWY	1	SparCC
BRANCHED-CHAIN-AA-SYN-PWY	ECASYN-PWY	1	SparCC
BRANCHED-CHAIN-AA-SYN-PWY	ENTBACSYN-PWY	1	SparCC
BRANCHED-CHAIN-AA-SYN-PWY	FAO-PWY	1	SparCC
BRANCHED-CHAIN-AA-SYN-PWY	FASYN-INITIAL-PWY	1	SparCC
BRANCHED-CHAIN-AA-SYN-PWY	FERMENTATION-PWY	1	SparCC
BRANCHED-CHAIN-AA-SYN-PWY	FOLSYN-PWY	1	SparCC
BRANCHED-CHAIN-AA-SYN-PWY	GALACT-GLUCUROCAT-PWY	1	SparCC
BRANCHED-CHAIN-AA-SYN-PWY	GALACTUROCAT-PWY	1	SparCC
BRANCHED-CHAIN-AA-SYN-PWY	GLCMANNANAUT-PWY	1	SparCC
BRANCHED-CHAIN-AA-SYN-PWY	GLUCONEO-PWY	1	SparCC
BRANCHED-CHAIN-AA-SYN-PWY	GLUCOSE1PMETAB-PWY	1	SparCC
BRANCHED-CHAIN-AA-SYN-PWY	GLUCUROCAT-PWY	1	SparCC
BRANCHED-CHAIN-AA-SYN-PWY	GLUTORN-PWY	1	SparCC
BRANCHED-CHAIN-AA-SYN-PWY	GLYCOCAT-PWY	1	SparCC
BRANCHED-CHAIN-AA-SYN-PWY	GLYCOGENSYNTH-PWY	1	SparCC
BRANCHED-CHAIN-AA-SYN-PWY	GLYCOL-GLYOXDEG-PWY	1	SparCC
BRANCHED-CHAIN-AA-SYN-PWY	GLYCOLYSIS	1	SparCC
BRANCHED-CHAIN-AA-SYN-PWY	GLYCOLYSIS-E-D	1	SparCC
BRANCHED-CHAIN-AA-SYN-PWY	GLYCOLYSIS-TCA-GLYOX-BYPASS	1	SparCC
BRANCHED-CHAIN-AA-SYN-PWY	GLYOXYLATE-BYPASS	1	SparCC
BRANCHED-CHAIN-AA-SYN-PWY	HCAMHPDEG-PWY	1	SparCC
BRANCHED-CHAIN-AA-SYN-PWY	HEME-BIOSYNTHESIS-II	1	SparCC
BRANCHED-CHAIN-AA-SYN-PWY	HEMESYN2-PWY	1	SparCC
BRANCHED-CHAIN-AA-SYN-PWY	HEXITOLDEGSUPER-PWY	1	SparCC
BRANCHED-CHAIN-AA-SYN-PWY	HISTSYN-PWY	1	SparCC
BRANCHED-CHAIN-AA-SYN-PWY	HOMOSER-METSYN-PWY	1	SparCC
BRANCHED-CHAIN-AA-SYN-PWY	HSERMETANA-PWY	1	SparCC
BRANCHED-CHAIN-AA-SYN-PWY	ILEUSYN-PWY	2	SpiecEasi,SparCC
BRANCHED-CHAIN-AA-SYN-PWY	KDO-NAGLIPASYN-PWY	1	SparCC
BRANCHED-CHAIN-AA-SYN-PWY	KETOGLUCONMET-PWY	1	SparCC
BRANCHED-CHAIN-AA-SYN-PWY	LIPASYN-PWY	1	SparCC
BRANCHED-CHAIN-AA-SYN-PWY	LPSSYN-PWY	1	SparCC
BRANCHED-CHAIN-AA-SYN-PWY	MET-SAM-PWY	1	SparCC
BRANCHED-CHAIN-AA-SYN-PWY	METH-ACETATE-PWY	1	SparCC
BRANCHED-CHAIN-AA-SYN-PWY	NAD-BIOSYNTHESIS-II	1	SparCC
BRANCHED-CHAIN-AA-SYN-PWY	NAGLIPASYN-PWY	1	SparCC
BRANCHED-CHAIN-AA-SYN-PWY	NONMEVIPP-PWY	1	SparCC
BRANCHED-CHAIN-AA-SYN-PWY	NONOXIPENT-PWY	2	SpiecEasi,SparCC
BRANCHED-CHAIN-AA-SYN-PWY	OANTIGEN-PWY	1	SparCC
BRANCHED-CHAIN-AA-SYN-PWY	P105-PWY	1	SparCC
BRANCHED-CHAIN-AA-SYN-PWY	P125-PWY	1	SparCC
BRANCHED-CHAIN-AA-SYN-PWY	P161-PWY	1	SparCC
BRANCHED-CHAIN-AA-SYN-PWY	P163-PWY	1	SparCC
BRANCHED-CHAIN-AA-SYN-PWY	P241-PWY	1	SparCC
BRANCHED-CHAIN-AA-SYN-PWY	P261-PWY	1	SparCC
BRANCHED-CHAIN-AA-SYN-PWY	P4-PWY	2	SpiecEasi,SparCC
CALVIN-PWY	CATECHOL-ORTHO-CLEAVAGE-PWY	1	SparCC
CALVIN-PWY	CHLOROPHYLL-SYN	1	SparCC
CALVIN-PWY	COA-PWY	1	SparCC
CALVIN-PWY	COLANSYN-PWY	1	SparCC
CALVIN-PWY	COMPLETE-ARO-PWY	2	SpiecEasi,SparCC
CALVIN-PWY	DAPLYSINESYN-PWY	1	SparCC
CALVIN-PWY	DENOVOPURINE2-PWY	1	SparCC
CALVIN-PWY	DTDPRHAMSYN-PWY	1	SparCC
CALVIN-PWY	ENTBACSYN-PWY	1	SparCC
CALVIN-PWY	FAO-PWY	1	SparCC
CALVIN-PWY	GALACT-GLUCUROCAT-PWY	1	SparCC
CALVIN-PWY	GALACTUROCAT-PWY	1	SparCC
CALVIN-PWY	GLCMANNANAUT-PWY	1	SparCC
CALVIN-PWY	GLUCARGALACTSUPER-PWY	1	SparCC
CALVIN-PWY	GLUCONEO-PWY	1	SparCC
CALVIN-PWY	GLUCOSE1PMETAB-PWY	1	SparCC
CALVIN-PWY	GLUCUROCAT-PWY	1	SparCC
CALVIN-PWY	GLUTORN-PWY	1	SparCC
CALVIN-PWY	GLYCOCAT-PWY	1	SparCC
CALVIN-PWY	GLYCOGENSYNTH-PWY	1	SparCC
CALVIN-PWY	GLYCOL-GLYOXDEG-PWY	1	SparCC
CALVIN-PWY	GLYCOLYSIS	1	SparCC
CALVIN-PWY	GLYCOLYSIS-E-D	1	SparCC
CALVIN-PWY	GLYCOLYSIS-TCA-GLYOX-BYPASS	1	SparCC
CALVIN-PWY	HISTSYN-PWY	1	SparCC
CALVIN-PWY	HOMOSER-METSYN-PWY	1	SparCC
CALVIN-PWY	HSERMETANA-PWY	1	SparCC
CALVIN-PWY	ILEUSYN-PWY	1	SparCC
CALVIN-PWY	KDO-NAGLIPASYN-PWY	1	SparCC
CALVIN-PWY	KETOGLUCONMET-PWY	1	SparCC
CALVIN-PWY	LPSSYN-PWY	1	SparCC
CALVIN-PWY	MET-SAM-PWY	1	SparCC
CALVIN-PWY	METH-ACETATE-PWY	1	SparCC
CALVIN-PWY	NAD-BIOSYNTHESIS-II	1	SparCC
CALVIN-PWY	NONMEVIPP-PWY	1	SparCC
CALVIN-PWY	NONOXIPENT-PWY	1	SparCC
CALVIN-PWY	OANTIGEN-PWY	1	SparCC
CALVIN-PWY	P122-PWY	1	SparCC
CALVIN-PWY	P124-PWY	1	SparCC
CALVIN-PWY	P125-PWY	1	SparCC
CALVIN-PWY	P161-PWY	1	SparCC
CALVIN-PWY	P163-PWY	1	SparCC
CALVIN-PWY	P241-PWY	1	SparCC
CALVIN-PWY	P261-PWY	1	SparCC
CALVIN-PWY	P4-PWY	1	SparCC
CATECHOL-ORTHO-CLEAVAGE-PWY	COA-PWY	1	SparCC
CATECHOL-ORTHO-CLEAVAGE-PWY	CRNFORCAT-PWY	1	SparCC
CATECHOL-ORTHO-CLEAVAGE-PWY	DENITRIFICATION-PWY	1	SparCC
CATECHOL-ORTHO-CLEAVAGE-PWY	DENOVOPURINE2-PWY	1	SparCC
CATECHOL-ORTHO-CLEAVAGE-PWY	ENTBACSYN-PWY	1	SparCC
CATECHOL-ORTHO-CLEAVAGE-PWY	FAO-PWY	1	SparCC
CATECHOL-ORTHO-CLEAVAGE-PWY	FASYN-ELONG-PWY	1	SparCC
CATECHOL-ORTHO-CLEAVAGE-PWY	GALLATE-DEGRADATION-I-PWY	1	SparCC
CATECHOL-ORTHO-CLEAVAGE-PWY	GLUCOSE1PMETAB-PWY	1	SparCC
CATECHOL-ORTHO-CLEAVAGE-PWY	GLYCOL-GLYOXDEG-PWY	2	SpiecEasi,SparCC
CATECHOL-ORTHO-CLEAVAGE-PWY	GLYCOLYSIS	1	SparCC
CATECHOL-ORTHO-CLEAVAGE-PWY	GOLPDLCAT-PWY	1	SparCC
CATECHOL-ORTHO-CLEAVAGE-PWY	HCAMHPDEG-PWY	1	SparCC
CATECHOL-ORTHO-CLEAVAGE-PWY	HISDEG-PWY	1	SparCC
CATECHOL-ORTHO-CLEAVAGE-PWY	HOMOSER-METSYN-PWY	1	SparCC
CATECHOL-ORTHO-CLEAVAGE-PWY	KDO-NAGLIPASYN-PWY	1	SparCC
CATECHOL-ORTHO-CLEAVAGE-PWY	MET-SAM-PWY	1	SparCC
CATECHOL-ORTHO-CLEAVAGE-PWY	METHGLYUT-PWY	2	SpiecEasi,SparCC
CATECHOL-ORTHO-CLEAVAGE-PWY	METHYLGALLATE-DEGRADATION-PWY	1	SparCC
CATECHOL-ORTHO-CLEAVAGE-PWY	NADSYN-PWY	1	SparCC
CATECHOL-ORTHO-CLEAVAGE-PWY	P101-PWY	2	SpiecEasi,SparCC
CATECHOL-ORTHO-CLEAVAGE-PWY	P122-PWY	1	SparCC
CATECHOL-ORTHO-CLEAVAGE-PWY	P124-PWY	1	SparCC
CATECHOL-ORTHO-CLEAVAGE-PWY	P161-PWY	1	SparCC
CATECHOL-ORTHO-CLEAVAGE-PWY	P221-PWY	1	SparCC
CENTFERM-PWY	DTDPRHAMSYN-PWY	1	SparCC
CENTFERM-PWY	ENTBACSYN-PWY	2	SpiecEasi,SparCC
CENTFERM-PWY	FAO-PWY	1	SparCC
CENTFERM-PWY	GLUCOSE1PMETAB-PWY	1	SparCC
CENTFERM-PWY	GLYCOCAT-PWY	1	SparCC
CENTFERM-PWY	GLYCOGENSYNTH-PWY	1	SparCC
CENTFERM-PWY	GLYOXYLATE-BYPASS	1	SparCC
CENTFERM-PWY	KETOGLUCONMET-PWY	2	SpiecEasi,SparCC
CENTFERM-PWY	LACTOSECAT-PWY	2	SpiecEasi,SparCC
CENTFERM-PWY	P108-PWY	1	SparCC
CENTFERM-PWY	P162-PWY	2	SpiecEasi,SparCC
CENTFERM-PWY	P164-PWY	2	SpiecEasi,SparCC
CENTFERM-PWY	P281-PWY	2	SpiecEasi,SparCC
CENTFERM-PWY	P381-PWY	1	SparCC
CHLOROPHYLL-SYN	COA-PWY	1	SparCC
CHLOROPHYLL-SYN	COLANSYN-PWY	1	SparCC
CHLOROPHYLL-SYN	COMPLETE-ARO-PWY	1	SparCC
CHLOROPHYLL-SYN	CRNFORCAT-PWY	1	SparCC
CHLOROPHYLL-SYN	DAPLYSINESYN-PWY	1	SparCC
CHLOROPHYLL-SYN	DENOVOPURINE2-PWY	1	SparCC
CHLOROPHYLL-SYN	DHGLUCONATE-PYR-CAT-PWY	2	SpiecEasi,SparCC
CHLOROPHYLL-SYN	DTDPRHAMSYN-PWY	1	SparCC
CHLOROPHYLL-SYN	FAO-PWY	1	SparCC
CHLOROPHYLL-SYN	FASYN-ELONG-PWY	1	SparCC
CHLOROPHYLL-SYN	FASYN-INITIAL-PWY	1	SparCC
CHLOROPHYLL-SYN	FUC-RHAMCAT-PWY	1	SparCC
CHLOROPHYLL-SYN	FUCCAT-PWY	1	SparCC
CHLOROPHYLL-SYN	GALACTUROCAT-PWY	1	SparCC
CHLOROPHYLL-SYN	GLCMANNANAUT-PWY	1	SparCC
CHLOROPHYLL-SYN	GLUCONEO-PWY	1	SparCC
CHLOROPHYLL-SYN	GLUCOSE1PMETAB-PWY	1	SparCC
CHLOROPHYLL-SYN	GLUCUROCAT-PWY	1	SparCC
CHLOROPHYLL-SYN	GLUTORN-PWY	1	SparCC
CHLOROPHYLL-SYN	GLYCOCAT-PWY	1	SparCC
CHLOROPHYLL-SYN	GLYCOGENSYNTH-PWY	1	SparCC
CHLOROPHYLL-SYN	GLYCOL-GLYOXDEG-PWY	1	SparCC
CHLOROPHYLL-SYN	GLYCOLYSIS	1	SparCC
CHLOROPHYLL-SYN	GLYCOLYSIS-E-D	1	SparCC
CHLOROPHYLL-SYN	GLYCOLYSIS-TCA-GLYOX-BYPASS	1	SparCC
CHLOROPHYLL-SYN	HCAMHPDEG-PWY	1	SparCC
CHLOROPHYLL-SYN	HEME-BIOSYNTHESIS-II	1	SparCC
CHLOROPHYLL-SYN	HEMESYN2-PWY	1	SparCC
CHLOROPHYLL-SYN	HISTSYN-PWY	1	SparCC
CHLOROPHYLL-SYN	HOMOSER-METSYN-PWY	1	SparCC
CHLOROPHYLL-SYN	ILEUSYN-PWY	1	SparCC
CHLOROPHYLL-SYN	LIPASYN-PWY	1	SparCC
CHLOROPHYLL-SYN	MET-SAM-PWY	1	SparCC
CHLOROPHYLL-SYN	METH-ACETATE-PWY	2	SpiecEasi,SparCC
CHLOROPHYLL-SYN	NAD-BIOSYNTHESIS-II	1	SparCC
CHLOROPHYLL-SYN	NAGLIPASYN-PWY	1	SparCC
CHLOROPHYLL-SYN	NONOXIPENT-PWY	1	SparCC
CHLOROPHYLL-SYN	OANTIGEN-PWY	1	SparCC
CHLOROPHYLL-SYN	P122-PWY	1	SparCC
CHLOROPHYLL-SYN	P124-PWY	1	SparCC
CHLOROPHYLL-SYN	P161-PWY	1	SparCC
CHLOROPHYLL-SYN	P162-PWY	2	SpiecEasi,SparCC
CHLOROPHYLL-SYN	P163-PWY	1	SparCC
CHLOROPHYLL-SYN	P23-PWY	1	SparCC
CHLOROPHYLL-SYN	P241-PWY	1	SparCC
CHLOROPHYLL-SYN	P261-PWY	1	SparCC
CHLOROPHYLL-SYN	P4-PWY	1	SparCC
COA-PWY	COBALSYN-PWY	1	SparCC
COA-PWY	COLANSYN-PWY	1	SparCC
COA-PWY	COMPLETE-ARO-PWY	1	SparCC
COA-PWY	CRNFORCAT-PWY	1	SparCC
COA-PWY	DAPLYSINESYN-PWY	1	SparCC
COA-PWY	DENOVOPURINE2-PWY	1	SparCC
COA-PWY	DHGLUCONATE-PYR-CAT-PWY	1	SparCC
COA-PWY	DTDPRHAMSYN-PWY	1	SparCC
COA-PWY	ECASYN-PWY	1	SparCC
COA-PWY	ENTBACSYN-PWY	1	SparCC
COA-PWY	FAO-PWY	1	SparCC
COA-PWY	FASYN-ELONG-PWY	1	SparCC
COA-PWY	FASYN-INITIAL-PWY	1	SparCC
COA-PWY	FOLSYN-PWY	1	SparCC
COA-PWY	FUC-RHAMCAT-PWY	1	SparCC
COA-PWY	FUCCAT-PWY	1	SparCC
COA-PWY	GALACT-GLUCUROCAT-PWY	1	SparCC
COA-PWY	GALACTUROCAT-PWY	1	SparCC
COA-PWY	GALLATE-DEGRADATION-II-PWY	1	SparCC
COA-PWY	GLCMANNANAUT-PWY	1	SparCC
COA-PWY	GLUCONEO-PWY	1	SparCC
COA-PWY	GLUCOSE1PMETAB-PWY	1	SparCC
COA-PWY	GLUCUROCAT-PWY	1	SparCC
COA-PWY	GLUTORN-PWY	1	SparCC
COA-PWY	GLYCOCAT-PWY	1	SparCC
COA-PWY	GLYCOGENSYNTH-PWY	1	SparCC
COA-PWY	GLYCOL-GLYOXDEG-PWY	1	SparCC
COA-PWY	GLYCOLYSIS	1	SparCC
COA-PWY	GLYCOLYSIS-E-D	1	SparCC
COA-PWY	GLYCOLYSIS-TCA-GLYOX-BYPASS	1	SparCC
COA-PWY	GLYOXYLATE-BYPASS	1	SparCC
COA-PWY	HCAMHPDEG-PWY	1	SparCC
COA-PWY	HEME-BIOSYNTHESIS-II	1	SparCC
COA-PWY	HEMESYN2-PWY	1	SparCC
COA-PWY	HEXITOLDEGSUPER-PWY	1	SparCC
COA-PWY	HISTSYN-PWY	1	SparCC
COA-PWY	HOMOSER-METSYN-PWY	1	SparCC
COA-PWY	HSERMETANA-PWY	1	SparCC
COA-PWY	ILEUSYN-PWY	1	SparCC
COA-PWY	KDO-NAGLIPASYN-PWY	1	SparCC
COA-PWY	LIPASYN-PWY	1	SparCC
COA-PWY	LPSSYN-PWY	1	SparCC
COA-PWY	MET-SAM-PWY	1	SparCC
COA-PWY	METH-ACETATE-PWY	1	SparCC
COA-PWY	NAD-BIOSYNTHESIS-II	1	SparCC
COA-PWY	NAGLIPASYN-PWY	1	SparCC
COA-PWY	NONMEVIPP-PWY	1	SparCC
COA-PWY	NONOXIPENT-PWY	1	SparCC
COA-PWY	OANTIGEN-PWY	1	SparCC
COA-PWY	P105-PWY	1	SparCC
COA-PWY	P122-PWY	1	SparCC
COA-PWY	P124-PWY	1	SparCC
COA-PWY	P125-PWY	1	SparCC
COA-PWY	P161-PWY	2	SpiecEasi,SparCC
COA-PWY	P162-PWY	1	SparCC
COA-PWY	P163-PWY	1	SparCC
COA-PWY	P221-PWY	1	SparCC
COA-PWY	P23-PWY	1	SparCC
COA-PWY	P241-PWY	1	SparCC
COA-PWY	P261-PWY	1	SparCC
COA-PWY	P4-PWY	1	SparCC
COBALSYN-PWY	DAPLYSINESYN-PWY	1	SparCC
COBALSYN-PWY	FASYN-INITIAL-PWY	1	SparCC
COBALSYN-PWY	FERMENTATION-PWY	2	SpiecEasi,SparCC
COBALSYN-PWY	FOLSYN-PWY	1	SparCC
COBALSYN-PWY	GALACTARDEG-PWY	1	SparCC
COBALSYN-PWY	GLUCARDEG-PWY	1	SparCC
COBALSYN-PWY	GLUCARGALACTSUPER-PWY	1	SparCC
COBALSYN-PWY	GLUCONEO-PWY	1	SparCC
COBALSYN-PWY	GLUTORN-PWY	1	SparCC
COBALSYN-PWY	GLYCOCAT-PWY	1	SparCC
COBALSYN-PWY	GLYCOGENSYNTH-PWY	1	SparCC
COBALSYN-PWY	GLYCOLYSIS-E-D	1	SparCC
COBALSYN-PWY	GLYCOLYSIS-TCA-GLYOX-BYPASS	1	SparCC
COBALSYN-PWY	GLYOXYLATE-BYPASS	1	SparCC
COBALSYN-PWY	HEME-BIOSYNTHESIS-II	1	SparCC
COBALSYN-PWY	HEMESYN2-PWY	2	SpiecEasi,SparCC
COBALSYN-PWY	HISDEG-PWY	1	SparCC
COBALSYN-PWY	HISTSYN-PWY	1	SparCC
COBALSYN-PWY	HOMOSER-METSYN-PWY	1	SparCC
COBALSYN-PWY	ILEUSYN-PWY	1	SparCC
COBALSYN-PWY	LEU-DEG2-PWY	2	SpiecEasi,SparCC
COBALSYN-PWY	LPSSYN-PWY	1	SparCC
COBALSYN-PWY	MET-SAM-PWY	1	SparCC
COBALSYN-PWY	NAGLIPASYN-PWY	2	SpiecEasi,SparCC
COBALSYN-PWY	NONOXIPENT-PWY	1	SparCC
COBALSYN-PWY	P105-PWY	1	SparCC
COBALSYN-PWY	P125-PWY	1	SparCC
COBALSYN-PWY	P221-PWY	1	SparCC
COLANSYN-PWY	COMPLETE-ARO-PWY	1	SparCC
COLANSYN-PWY	DAPLYSINESYN-PWY	1	SparCC
COLANSYN-PWY	DENOVOPURINE2-PWY	1	SparCC
COLANSYN-PWY	DTDPRHAMSYN-PWY	1	SparCC
COLANSYN-PWY	FASYN-ELONG-PWY	1	SparCC
COLANSYN-PWY	FOLSYN-PWY	1	SparCC
COLANSYN-PWY	FUC-RHAMCAT-PWY	1	SparCC
COLANSYN-PWY	FUCCAT-PWY	1	SparCC
COLANSYN-PWY	GALACT-GLUCUROCAT-PWY	1	SparCC
COLANSYN-PWY	GALACTUROCAT-PWY	1	SparCC
COLANSYN-PWY	GALLATE-DEGRADATION-II-PWY	1	SparCC
COLANSYN-PWY	GLCMANNANAUT-PWY	1	SparCC
COLANSYN-PWY	GLUCONEO-PWY	1	SparCC
COLANSYN-PWY	GLUCOSE1PMETAB-PWY	1	SparCC
COLANSYN-PWY	GLUCUROCAT-PWY	1	SparCC
COLANSYN-PWY	GLUTORN-PWY	1	SparCC
COLANSYN-PWY	GLYCOGENSYNTH-PWY	1	SparCC
COLANSYN-PWY	GLYCOLYSIS	1	SparCC
COLANSYN-PWY	GLYCOLYSIS-E-D	1	SparCC
COLANSYN-PWY	GLYCOLYSIS-TCA-GLYOX-BYPASS	1	SparCC
COLANSYN-PWY	HCAMHPDEG-PWY	1	SparCC
COLANSYN-PWY	HEXITOLDEGSUPER-PWY	1	SparCC
COLANSYN-PWY	HISDEG-PWY	1	SparCC
COLANSYN-PWY	HISTSYN-PWY	1	SparCC
COLANSYN-PWY	HOMOSER-METSYN-PWY	1	SparCC
COLANSYN-PWY	HSERMETANA-PWY	1	SparCC
COLANSYN-PWY	ILEUSYN-PWY	1	SparCC
COLANSYN-PWY	LACTOSECAT-PWY	1	SparCC
COLANSYN-PWY	LIPASYN-PWY	1	SparCC
COLANSYN-PWY	MET-SAM-PWY	1	SparCC
COLANSYN-PWY	METH-ACETATE-PWY	1	SparCC
COLANSYN-PWY	METHYLGALLATE-DEGRADATION-PWY	1	SparCC
COLANSYN-PWY	NAGLIPASYN-PWY	1	SparCC
COLANSYN-PWY	NONOXIPENT-PWY	1	SparCC
COLANSYN-PWY	OANTIGEN-PWY	1	SparCC
COLANSYN-PWY	P108-PWY	1	SparCC
COLANSYN-PWY	P122-PWY	1	SparCC
COLANSYN-PWY	P124-PWY	1	SparCC
COLANSYN-PWY	P125-PWY	1	SparCC
COLANSYN-PWY	P161-PWY	1	SparCC
COLANSYN-PWY	P163-PWY	1	SparCC
COLANSYN-PWY	P184-PWY	1	SparCC
COLANSYN-PWY	P23-PWY	2	SpiecEasi,SparCC
COLANSYN-PWY	P241-PWY	1	SparCC
COLANSYN-PWY	P261-PWY	1	SparCC
COLANSYN-PWY	P4-PWY	1	SparCC
COMPLETE-ARO-PWY	CRNFORCAT-PWY	1	SparCC
COMPLETE-ARO-PWY	DAPLYSINESYN-PWY	1	SparCC
COMPLETE-ARO-PWY	DENOVOPURINE2-PWY	1	SparCC
COMPLETE-ARO-PWY	DHGLUCONATE-PYR-CAT-PWY	1	SparCC
COMPLETE-ARO-PWY	DTDPRHAMSYN-PWY	1	SparCC
COMPLETE-ARO-PWY	ECASYN-PWY	1	SparCC
COMPLETE-ARO-PWY	ENTBACSYN-PWY	1	SparCC
COMPLETE-ARO-PWY	FAO-PWY	1	SparCC
COMPLETE-ARO-PWY	FASYN-ELONG-PWY	1	SparCC
COMPLETE-ARO-PWY	FASYN-INITIAL-PWY	1	SparCC
COMPLETE-ARO-PWY	FERMENTATION-PWY	1	SparCC
COMPLETE-ARO-PWY	FOLSYN-PWY	1	SparCC
COMPLETE-ARO-PWY	GALACT-GLUCUROCAT-PWY	1	SparCC
COMPLETE-ARO-PWY	GALACTUROCAT-PWY	1	SparCC
COMPLETE-ARO-PWY	GALLATE-DEGRADATION-II-PWY	1	SparCC
COMPLETE-ARO-PWY	GLCMANNANAUT-PWY	1	SparCC
COMPLETE-ARO-PWY	GLUCONEO-PWY	1	SparCC
COMPLETE-ARO-PWY	GLUCOSE1PMETAB-PWY	1	SparCC
COMPLETE-ARO-PWY	GLUCUROCAT-PWY	1	SparCC
COMPLETE-ARO-PWY	GLUTORN-PWY	1	SparCC
COMPLETE-ARO-PWY	GLYCOCAT-PWY	1	SparCC
COMPLETE-ARO-PWY	GLYCOGENSYNTH-PWY	1	SparCC
COMPLETE-ARO-PWY	GLYCOL-GLYOXDEG-PWY	1	SparCC
COMPLETE-ARO-PWY	GLYCOLYSIS	1	SparCC
COMPLETE-ARO-PWY	GLYCOLYSIS-E-D	1	SparCC
COMPLETE-ARO-PWY	GLYCOLYSIS-TCA-GLYOX-BYPASS	1	SparCC
COMPLETE-ARO-PWY	GLYOXYLATE-BYPASS	1	SparCC
COMPLETE-ARO-PWY	HCAMHPDEG-PWY	1	SparCC
COMPLETE-ARO-PWY	HEME-BIOSYNTHESIS-II	1	SparCC
COMPLETE-ARO-PWY	HEMESYN2-PWY	1	SparCC
COMPLETE-ARO-PWY	HEXITOLDEGSUPER-PWY	1	SparCC
COMPLETE-ARO-PWY	HISTSYN-PWY	1	SparCC
COMPLETE-ARO-PWY	HOMOSER-METSYN-PWY	1	SparCC
COMPLETE-ARO-PWY	HSERMETANA-PWY	1	SparCC
COMPLETE-ARO-PWY	ILEUSYN-PWY	1	SparCC
COMPLETE-ARO-PWY	KDO-NAGLIPASYN-PWY	1	SparCC
COMPLETE-ARO-PWY	KETOGLUCONMET-PWY	1	SparCC
COMPLETE-ARO-PWY	LIPASYN-PWY	1	SparCC
COMPLETE-ARO-PWY	LPSSYN-PWY	1	SparCC
COMPLETE-ARO-PWY	MET-SAM-PWY	1	SparCC
COMPLETE-ARO-PWY	METH-ACETATE-PWY	1	SparCC
COMPLETE-ARO-PWY	NAD-BIOSYNTHESIS-II	1	SparCC
COMPLETE-ARO-PWY	NAGLIPASYN-PWY	1	SparCC
COMPLETE-ARO-PWY	NONMEVIPP-PWY	1	SparCC
COMPLETE-ARO-PWY	NONOXIPENT-PWY	1	SparCC
COMPLETE-ARO-PWY	OANTIGEN-PWY	1	SparCC
COMPLETE-ARO-PWY	P105-PWY	1	SparCC
COMPLETE-ARO-PWY	P124-PWY	1	SparCC
COMPLETE-ARO-PWY	P125-PWY	1	SparCC
COMPLETE-ARO-PWY	P161-PWY	1	SparCC
COMPLETE-ARO-PWY	P163-PWY	1	SparCC
COMPLETE-ARO-PWY	P221-PWY	1	SparCC
COMPLETE-ARO-PWY	P23-PWY	1	SparCC
COMPLETE-ARO-PWY	P241-PWY	1	SparCC
COMPLETE-ARO-PWY	P261-PWY	1	SparCC
COMPLETE-ARO-PWY	P4-PWY	1	SparCC
CRNFORCAT-PWY	DAPLYSINESYN-PWY	1	SparCC
CRNFORCAT-PWY	DENITRIFICATION-PWY	2	SpiecEasi,SparCC
CRNFORCAT-PWY	DHGLUCONATE-PYR-CAT-PWY	1	SparCC
CRNFORCAT-PWY	DTDPRHAMSYN-PWY	1	SparCC
CRNFORCAT-PWY	ECASYN-PWY	1	SparCC
CRNFORCAT-PWY	FASYN-INITIAL-PWY	1	SparCC
CRNFORCAT-PWY	FUC-RHAMCAT-PWY	1	SparCC
CRNFORCAT-PWY	FUCCAT-PWY	1	SparCC
CRNFORCAT-PWY	GALACT-GLUCUROCAT-PWY	1	SparCC
CRNFORCAT-PWY	GALACTARDEG-PWY	1	SparCC
CRNFORCAT-PWY	GALLATE-DEGRADATION-I-PWY	1	SparCC
CRNFORCAT-PWY	GALLATE-DEGRADATION-II-PWY	1	SparCC
CRNFORCAT-PWY	GLCMANNANAUT-PWY	1	SparCC
CRNFORCAT-PWY	GLUCARDEG-PWY	1	SparCC
CRNFORCAT-PWY	GLUCARGALACTSUPER-PWY	1	SparCC
CRNFORCAT-PWY	GLUCUROCAT-PWY	1	SparCC
CRNFORCAT-PWY	GLUTORN-PWY	1	SparCC
CRNFORCAT-PWY	GLYCOCAT-PWY	1	SparCC
CRNFORCAT-PWY	GLYCOGENSYNTH-PWY	1	SparCC
CRNFORCAT-PWY	GLYCOLYSIS	1	SparCC
CRNFORCAT-PWY	HCAMHPDEG-PWY	2	SpiecEasi,SparCC
CRNFORCAT-PWY	HEXITOLDEGSUPER-PWY	1	SparCC
CRNFORCAT-PWY	HISTSYN-PWY	1	SparCC
CRNFORCAT-PWY	ILEUSYN-PWY	1	SparCC
CRNFORCAT-PWY	KDO-NAGLIPASYN-PWY	1	SparCC
CRNFORCAT-PWY	LEU-DEG2-PWY	1	SparCC
CRNFORCAT-PWY	LIPASYN-PWY	2	SpiecEasi,SparCC
CRNFORCAT-PWY	LPSSYN-PWY	2	SpiecEasi,SparCC
CRNFORCAT-PWY	METH-ACETATE-PWY	1	SparCC
CRNFORCAT-PWY	METHGLYUT-PWY	1	SparCC
CRNFORCAT-PWY	METHYLGALLATE-DEGRADATION-PWY	1	SparCC
CRNFORCAT-PWY	NAD-BIOSYNTHESIS-II	1	SparCC
CRNFORCAT-PWY	NADSYN-PWY	1	SparCC
CRNFORCAT-PWY	NAGLIPASYN-PWY	1	SparCC
CRNFORCAT-PWY	NONOXIPENT-PWY	1	SparCC
CRNFORCAT-PWY	OANTIGEN-PWY	1	SparCC
CRNFORCAT-PWY	ORNARGDEG-PWY	1	SparCC
CRNFORCAT-PWY	ORNDEG-PWY	1	SparCC
CRNFORCAT-PWY	P101-PWY	1	SparCC
CRNFORCAT-PWY	P161-PWY	1	SparCC
CRNFORCAT-PWY	P163-PWY	1	SparCC
CRNFORCAT-PWY	P241-PWY	1	SparCC
CRNFORCAT-PWY	P261-PWY	1	SparCC
DAPLYSINESYN-PWY	DENOVOPURINE2-PWY	1	SparCC
DAPLYSINESYN-PWY	DHGLUCONATE-PYR-CAT-PWY	1	SparCC
DAPLYSINESYN-PWY	DTDPRHAMSYN-PWY	1	SparCC
DAPLYSINESYN-PWY	ECASYN-PWY	1	SparCC
DAPLYSINESYN-PWY	ENTBACSYN-PWY	1	SparCC
DAPLYSINESYN-PWY	FAO-PWY	1	SparCC
DAPLYSINESYN-PWY	FASYN-ELONG-PWY	1	SparCC
DAPLYSINESYN-PWY	FASYN-INITIAL-PWY	1	SparCC
DAPLYSINESYN-PWY	FERMENTATION-PWY	1	SparCC
DAPLYSINESYN-PWY	FOLSYN-PWY	1	SparCC
DAPLYSINESYN-PWY	FUC-RHAMCAT-PWY	1	SparCC
DAPLYSINESYN-PWY	FUCCAT-PWY	1	SparCC
DAPLYSINESYN-PWY	GALACT-GLUCUROCAT-PWY	1	SparCC
DAPLYSINESYN-PWY	GALACTUROCAT-PWY	1	SparCC
DAPLYSINESYN-PWY	GALLATE-DEGRADATION-I-PWY	1	SparCC
DAPLYSINESYN-PWY	GALLATE-DEGRADATION-II-PWY	1	SparCC
DAPLYSINESYN-PWY	GLCMANNANAUT-PWY	1	SparCC
DAPLYSINESYN-PWY	GLUCONEO-PWY	1	SparCC
DAPLYSINESYN-PWY	GLUCOSE1PMETAB-PWY	1	SparCC
DAPLYSINESYN-PWY	GLUCUROCAT-PWY	1	SparCC
DAPLYSINESYN-PWY	GLUTORN-PWY	1	SparCC
DAPLYSINESYN-PWY	GLYCOCAT-PWY	1	SparCC
DAPLYSINESYN-PWY	GLYCOGENSYNTH-PWY	1	SparCC
DAPLYSINESYN-PWY	GLYCOL-GLYOXDEG-PWY	1	SparCC
DAPLYSINESYN-PWY	GLYCOLYSIS	1	SparCC
DAPLYSINESYN-PWY	GLYCOLYSIS-E-D	1	SparCC
DAPLYSINESYN-PWY	GLYCOLYSIS-TCA-GLYOX-BYPASS	1	SparCC
DAPLYSINESYN-PWY	GLYOXYLATE-BYPASS	1	SparCC
DAPLYSINESYN-PWY	HCAMHPDEG-PWY	1	SparCC
DAPLYSINESYN-PWY	HEME-BIOSYNTHESIS-II	1	SparCC
DAPLYSINESYN-PWY	HEMESYN2-PWY	1	SparCC
DAPLYSINESYN-PWY	HEXITOLDEGSUPER-PWY	1	SparCC
DAPLYSINESYN-PWY	HISTSYN-PWY	1	SparCC
DAPLYSINESYN-PWY	HOMOSER-METSYN-PWY	1	SparCC
DAPLYSINESYN-PWY	HSERMETANA-PWY	1	SparCC
DAPLYSINESYN-PWY	ILEUSYN-PWY	1	SparCC
DAPLYSINESYN-PWY	KDO-NAGLIPASYN-PWY	1	SparCC
DAPLYSINESYN-PWY	LIPASYN-PWY	1	SparCC
DAPLYSINESYN-PWY	LPSSYN-PWY	1	SparCC
DAPLYSINESYN-PWY	MET-SAM-PWY	1	SparCC
DAPLYSINESYN-PWY	METH-ACETATE-PWY	1	SparCC
DAPLYSINESYN-PWY	NAD-BIOSYNTHESIS-II	1	SparCC
DAPLYSINESYN-PWY	NAGLIPASYN-PWY	1	SparCC
DAPLYSINESYN-PWY	NONMEVIPP-PWY	1	SparCC
DAPLYSINESYN-PWY	NONOXIPENT-PWY	2	SpiecEasi,SparCC
DAPLYSINESYN-PWY	OANTIGEN-PWY	1	SparCC
DAPLYSINESYN-PWY	P105-PWY	1	SparCC
DAPLYSINESYN-PWY	P108-PWY	1	SparCC
DAPLYSINESYN-PWY	P122-PWY	1	SparCC
DAPLYSINESYN-PWY	P124-PWY	1	SparCC
DAPLYSINESYN-PWY	P125-PWY	1	SparCC
DAPLYSINESYN-PWY	P161-PWY	1	SparCC
DAPLYSINESYN-PWY	P163-PWY	1	SparCC
DAPLYSINESYN-PWY	P184-PWY	1	SparCC
DAPLYSINESYN-PWY	P221-PWY	1	SparCC
DAPLYSINESYN-PWY	P23-PWY	1	SparCC
DAPLYSINESYN-PWY	P241-PWY	1	SparCC
DAPLYSINESYN-PWY	P261-PWY	1	SparCC
DAPLYSINESYN-PWY	P4-PWY	1	SparCC
DENITRIFICATION-PWY	DHGLUCONATE-PYR-CAT-PWY	1	SparCC
DENITRIFICATION-PWY	ECASYN-PWY	1	SparCC
DENITRIFICATION-PWY	FUC-RHAMCAT-PWY	1	SparCC
DENITRIFICATION-PWY	FUCCAT-PWY	1	SparCC
DENITRIFICATION-PWY	GALACTARDEG-PWY	1	SparCC
DENITRIFICATION-PWY	GALLATE-DEGRADATION-I-PWY	1	SparCC
DENITRIFICATION-PWY	GALLATE-DEGRADATION-II-PWY	1	SparCC
DENITRIFICATION-PWY	GLUCARDEG-PWY	1	SparCC
DENITRIFICATION-PWY	GLUCARGALACTSUPER-PWY	1	SparCC
DENITRIFICATION-PWY	GLYCOL-GLYOXDEG-PWY	1	SparCC
DENITRIFICATION-PWY	HCAMHPDEG-PWY	1	SparCC
DENITRIFICATION-PWY	HEXITOLDEGSUPER-PWY	1	SparCC
DENITRIFICATION-PWY	KDO-NAGLIPASYN-PWY	1	SparCC
DENITRIFICATION-PWY	LEU-DEG2-PWY	1	SparCC
DENITRIFICATION-PWY	LIPASYN-PWY	1	SparCC
DENITRIFICATION-PWY	LPSSYN-PWY	1	SparCC
DENITRIFICATION-PWY	METHGLYUT-PWY	1	SparCC
DENITRIFICATION-PWY	METHYLGALLATE-DEGRADATION-PWY	1	SparCC
DENITRIFICATION-PWY	NADSYN-PWY	2	SpiecEasi,SparCC
DENITRIFICATION-PWY	ORNARGDEG-PWY	1	SparCC
DENITRIFICATION-PWY	ORNDEG-PWY	1	SparCC
DENITRIFICATION-PWY	P101-PWY	2	SpiecEasi,SparCC
DENITRIFICATION-PWY	P125-PWY	1	SparCC
DENITRIFICATION-PWY	P221-PWY	1	SparCC
DENOVOPURINE2-PWY	DHGLUCONATE-PYR-CAT-PWY	1	SparCC
DENOVOPURINE2-PWY	DTDPRHAMSYN-PWY	1	SparCC
DENOVOPURINE2-PWY	FAO-PWY	1	SparCC
DENOVOPURINE2-PWY	FASYN-ELONG-PWY	2	SpiecEasi,SparCC
DENOVOPURINE2-PWY	GALACT-GLUCUROCAT-PWY	1	SparCC
DENOVOPURINE2-PWY	GALACTUROCAT-PWY	1	SparCC
DENOVOPURINE2-PWY	GLCMANNANAUT-PWY	1	SparCC
DENOVOPURINE2-PWY	GLUCONEO-PWY	1	SparCC
DENOVOPURINE2-PWY	GLUCOSE1PMETAB-PWY	1	SparCC
DENOVOPURINE2-PWY	GLUCUROCAT-PWY	1	SparCC
DENOVOPURINE2-PWY	GLYCOL-GLYOXDEG-PWY	1	SparCC
DENOVOPURINE2-PWY	GLYCOLYSIS	1	SparCC
DENOVOPURINE2-PWY	GLYCOLYSIS-E-D	1	SparCC
DENOVOPURINE2-PWY	GLYCOLYSIS-TCA-GLYOX-BYPASS	1	SparCC
DENOVOPURINE2-PWY	HOMOSER-METSYN-PWY	1	SparCC
DENOVOPURINE2-PWY	ILEUSYN-PWY	1	SparCC
DENOVOPURINE2-PWY	LIPASYN-PWY	1	SparCC
DENOVOPURINE2-PWY	MET-SAM-PWY	1	SparCC
DENOVOPURINE2-PWY	METH-ACETATE-PWY	1	SparCC
DENOVOPURINE2-PWY	NAD-BIOSYNTHESIS-II	1	SparCC
DENOVOPURINE2-PWY	NONOXIPENT-PWY	1	SparCC
DENOVOPURINE2-PWY	OANTIGEN-PWY	1	SparCC
DENOVOPURINE2-PWY	P122-PWY	1	SparCC
DENOVOPURINE2-PWY	P124-PWY	1	SparCC
DENOVOPURINE2-PWY	P161-PWY	1	SparCC
DENOVOPURINE2-PWY	P162-PWY	1	SparCC
DENOVOPURINE2-PWY	P163-PWY	1	SparCC
DENOVOPURINE2-PWY	P241-PWY	1	SparCC
DENOVOPURINE2-PWY	P261-PWY	1	SparCC
DENOVOPURINE2-PWY	P4-PWY	1	SparCC
DHGLUCONATE-PYR-CAT-PWY	DTDPRHAMSYN-PWY	1	SparCC
DHGLUCONATE-PYR-CAT-PWY	ECASYN-PWY	1	SparCC
DHGLUCONATE-PYR-CAT-PWY	FASYN-INITIAL-PWY	1	SparCC
DHGLUCONATE-PYR-CAT-PWY	FUC-RHAMCAT-PWY	1	SparCC
DHGLUCONATE-PYR-CAT-PWY	FUCCAT-PWY	1	SparCC
DHGLUCONATE-PYR-CAT-PWY	GALACT-GLUCUROCAT-PWY	1	SparCC
DHGLUCONATE-PYR-CAT-PWY	GLCMANNANAUT-PWY	1	SparCC
DHGLUCONATE-PYR-CAT-PWY	GLUTORN-PWY	1	SparCC
DHGLUCONATE-PYR-CAT-PWY	GLYCOCAT-PWY	1	SparCC
DHGLUCONATE-PYR-CAT-PWY	GLYCOGENSYNTH-PWY	1	SparCC
DHGLUCONATE-PYR-CAT-PWY	GLYCOLYSIS	1	SparCC
DHGLUCONATE-PYR-CAT-PWY	HISTSYN-PWY	1	SparCC
DHGLUCONATE-PYR-CAT-PWY	ILEUSYN-PWY	1	SparCC
DHGLUCONATE-PYR-CAT-PWY	KDO-NAGLIPASYN-PWY	1	SparCC
DHGLUCONATE-PYR-CAT-PWY	LIPASYN-PWY	2	SpiecEasi,SparCC
DHGLUCONATE-PYR-CAT-PWY	METH-ACETATE-PWY	1	SparCC
DHGLUCONATE-PYR-CAT-PWY	NAD-BIOSYNTHESIS-II	2	SpiecEasi,SparCC
DHGLUCONATE-PYR-CAT-PWY	NADSYN-PWY	1	SparCC
DHGLUCONATE-PYR-CAT-PWY	NAGLIPASYN-PWY	1	SparCC
DHGLUCONATE-PYR-CAT-PWY	NONOXIPENT-PWY	1	SparCC
DHGLUCONATE-PYR-CAT-PWY	OANTIGEN-PWY	1	SparCC
DHGLUCONATE-PYR-CAT-PWY	ORNDEG-PWY	1	SparCC
DHGLUCONATE-PYR-CAT-PWY	P101-PWY	1	SparCC
DHGLUCONATE-PYR-CAT-PWY	P241-PWY	1	SparCC
DTDPRHAMSYN-PWY	ECASYN-PWY	1	SparCC
DTDPRHAMSYN-PWY	ENTBACSYN-PWY	1	SparCC
DTDPRHAMSYN-PWY	FAO-PWY	1	SparCC
DTDPRHAMSYN-PWY	FASYN-ELONG-PWY	1	SparCC
DTDPRHAMSYN-PWY	FASYN-INITIAL-PWY	1	SparCC
DTDPRHAMSYN-PWY	FOLSYN-PWY	1	SparCC
DTDPRHAMSYN-PWY	FUC-RHAMCAT-PWY	1	SparCC
DTDPRHAMSYN-PWY	FUCCAT-PWY	1	SparCC
DTDPRHAMSYN-PWY	GALACT-GLUCUROCAT-PWY	1	SparCC
DTDPRHAMSYN-PWY	GALACTARDEG-PWY	1	SparCC
DTDPRHAMSYN-PWY	GALACTUROCAT-PWY	1	SparCC
DTDPRHAMSYN-PWY	GALLATE-DEGRADATION-II-PWY	1	SparCC
DTDPRHAMSYN-PWY	GLCMANNANAUT-PWY	1	SparCC
DTDPRHAMSYN-PWY	GLUCARDEG-PWY	1	SparCC
DTDPRHAMSYN-PWY	GLUCARGALACTSUPER-PWY	1	SparCC
DTDPRHAMSYN-PWY	GLUCONEO-PWY	1	SparCC
DTDPRHAMSYN-PWY	GLUCOSE1PMETAB-PWY	1	SparCC
DTDPRHAMSYN-PWY	GLUCUROCAT-PWY	1	SparCC
DTDPRHAMSYN-PWY	GLUTORN-PWY	1	SparCC
DTDPRHAMSYN-PWY	GLYCOCAT-PWY	1	SparCC
DTDPRHAMSYN-PWY	GLYCOGENSYNTH-PWY	1	SparCC
DTDPRHAMSYN-PWY	GLYCOL-GLYOXDEG-PWY	1	SparCC
DTDPRHAMSYN-PWY	GLYCOLYSIS	1	SparCC
DTDPRHAMSYN-PWY	GLYCOLYSIS-E-D	1	SparCC
DTDPRHAMSYN-PWY	GLYCOLYSIS-TCA-GLYOX-BYPASS	1	SparCC
DTDPRHAMSYN-PWY	GLYOXYLATE-BYPASS	1	SparCC
DTDPRHAMSYN-PWY	HCAMHPDEG-PWY	1	SparCC
DTDPRHAMSYN-PWY	HEME-BIOSYNTHESIS-II	1	SparCC
DTDPRHAMSYN-PWY	HEMESYN2-PWY	1	SparCC
DTDPRHAMSYN-PWY	HEXITOLDEGSUPER-PWY	1	SparCC
DTDPRHAMSYN-PWY	HISTSYN-PWY	1	SparCC
DTDPRHAMSYN-PWY	HOMOSER-METSYN-PWY	1	SparCC
DTDPRHAMSYN-PWY	HSERMETANA-PWY	2	SpiecEasi,SparCC
DTDPRHAMSYN-PWY	ILEUSYN-PWY	1	SparCC
DTDPRHAMSYN-PWY	KDO-NAGLIPASYN-PWY	1	SparCC
DTDPRHAMSYN-PWY	KETOGLUCONMET-PWY	1	SparCC
DTDPRHAMSYN-PWY	LEU-DEG2-PWY	1	SparCC
DTDPRHAMSYN-PWY	LIPASYN-PWY	1	SparCC
DTDPRHAMSYN-PWY	LPSSYN-PWY	1	SparCC
DTDPRHAMSYN-PWY	MET-SAM-PWY	1	SparCC
DTDPRHAMSYN-PWY	METH-ACETATE-PWY	1	SparCC
DTDPRHAMSYN-PWY	NAD-BIOSYNTHESIS-II	1	SparCC
DTDPRHAMSYN-PWY	NADSYN-PWY	1	SparCC
DTDPRHAMSYN-PWY	NAGLIPASYN-PWY	1	SparCC
DTDPRHAMSYN-PWY	NONMEVIPP-PWY	1	SparCC
DTDPRHAMSYN-PWY	NONOXIPENT-PWY	1	SparCC
DTDPRHAMSYN-PWY	OANTIGEN-PWY	2	SpiecEasi,SparCC
DTDPRHAMSYN-PWY	ORNARGDEG-PWY	1	SparCC
DTDPRHAMSYN-PWY	ORNDEG-PWY	1	SparCC
DTDPRHAMSYN-PWY	P105-PWY	1	SparCC
DTDPRHAMSYN-PWY	P161-PWY	1	SparCC
DTDPRHAMSYN-PWY	P162-PWY	1	SparCC
DTDPRHAMSYN-PWY	P163-PWY	1	SparCC
DTDPRHAMSYN-PWY	P241-PWY	1	SparCC
DTDPRHAMSYN-PWY	P261-PWY	1	SparCC
DTDPRHAMSYN-PWY	P281-PWY	1	SparCC
DTDPRHAMSYN-PWY	P4-PWY	1	SparCC
ECASYN-PWY	FAO-PWY	1	SparCC
ECASYN-PWY	FUC-RHAMCAT-PWY	1	SparCC
ECASYN-PWY	FUCCAT-PWY	1	SparCC
ECASYN-PWY	GALACT-GLUCUROCAT-PWY	1	SparCC
ECASYN-PWY	GALACTARDEG-PWY	1	SparCC
ECASYN-PWY	GALACTUROCAT-PWY	1	SparCC
ECASYN-PWY	GALLATE-DEGRADATION-I-PWY	1	SparCC
ECASYN-PWY	GALLATE-DEGRADATION-II-PWY	1	SparCC
ECASYN-PWY	GLUCARDEG-PWY	1	SparCC
ECASYN-PWY	GLUCARGALACTSUPER-PWY	1	SparCC
ECASYN-PWY	GLUCOSE1PMETAB-PWY	1	SparCC
ECASYN-PWY	GLUCUROCAT-PWY	1	SparCC
ECASYN-PWY	GLYCOCAT-PWY	1	SparCC
ECASYN-PWY	GLYCOGENSYNTH-PWY	1	SparCC
ECASYN-PWY	GLYCOLYSIS-TCA-GLYOX-BYPASS	1	SparCC
ECASYN-PWY	HCAMHPDEG-PWY	1	SparCC
ECASYN-PWY	HEXITOLDEGSUPER-PWY	1	SparCC
ECASYN-PWY	HSERMETANA-PWY	1	SparCC
ECASYN-PWY	KDO-NAGLIPASYN-PWY	2	SpiecEasi,SparCC
ECASYN-PWY	LACTOSECAT-PWY	1	SparCC
ECASYN-PWY	LEU-DEG2-PWY	2	SpiecEasi,SparCC
ECASYN-PWY	LIPASYN-PWY	1	SparCC
ECASYN-PWY	LPSSYN-PWY	2	SpiecEasi,SparCC
ECASYN-PWY	METHYLGALLATE-DEGRADATION-PWY	1	SparCC
ECASYN-PWY	NAD-BIOSYNTHESIS-II	1	SparCC
ECASYN-PWY	NADSYN-PWY	2	SpiecEasi,SparCC
ECASYN-PWY	NONOXIPENT-PWY	1	SparCC
ECASYN-PWY	OANTIGEN-PWY	1	SparCC
ECASYN-PWY	ORNARGDEG-PWY	1	SparCC
ECASYN-PWY	ORNDEG-PWY	1	SparCC
ECASYN-PWY	P101-PWY	1	SparCC
ECASYN-PWY	P163-PWY	1	SparCC
ECASYN-PWY	P164-PWY	1	SparCC
ECASYN-PWY	P184-PWY	1	SparCC
ECASYN-PWY	P241-PWY	1	SparCC
ECASYN-PWY	P261-PWY	1	SparCC
ECASYN-PWY	P281-PWY	2	SpiecEasi,SparCC
ENTBACSYN-PWY	FAO-PWY	1	SparCC
ENTBACSYN-PWY	GALACTARDEG-PWY	1	SparCC
ENTBACSYN-PWY	GLUCARDEG-PWY	1	SparCC
ENTBACSYN-PWY	GLUCARGALACTSUPER-PWY	1	SparCC
ENTBACSYN-PWY	GLUCOSE1PMETAB-PWY	1	SparCC
ENTBACSYN-PWY	GLUTORN-PWY	1	SparCC
ENTBACSYN-PWY	GLYCOCAT-PWY	1	SparCC
ENTBACSYN-PWY	GLYCOGENSYNTH-PWY	1	SparCC
ENTBACSYN-PWY	GLYCOL-GLYOXDEG-PWY	2	SpiecEasi,SparCC
ENTBACSYN-PWY	HISDEG-PWY	1	SparCC
ENTBACSYN-PWY	HISTSYN-PWY	1	SparCC
ENTBACSYN-PWY	HOMOSER-METSYN-PWY	1	SparCC
ENTBACSYN-PWY	HSERMETANA-PWY	1	SparCC
ENTBACSYN-PWY	ILEUSYN-PWY	1	SparCC
ENTBACSYN-PWY	KETOGLUCONMET-PWY	2	SpiecEasi,SparCC
ENTBACSYN-PWY	MET-SAM-PWY	1	SparCC
ENTBACSYN-PWY	METHGLYUT-PWY	1	SparCC
ENTBACSYN-PWY	NONMEVIPP-PWY	1	SparCC
ENTBACSYN-PWY	NONOXIPENT-PWY	1	SparCC
ENTBACSYN-PWY	OANTIGEN-PWY	1	SparCC
ENTBACSYN-PWY	ORNARGDEG-PWY	1	SparCC
ENTBACSYN-PWY	ORNDEG-PWY	1	SparCC
ENTBACSYN-PWY	P108-PWY	1	SparCC
ENTBACSYN-PWY	P161-PWY	1	SparCC
ENTBACSYN-PWY	P164-PWY	1	SparCC
ENTBACSYN-PWY	P23-PWY	1	SparCC
ENTBACSYN-PWY	P261-PWY	1	SparCC
ENTBACSYN-PWY	P4-PWY	1	SparCC
FAO-PWY	FASYN-ELONG-PWY	1	SparCC
FAO-PWY	FASYN-INITIAL-PWY	1	SparCC
FAO-PWY	GALACT-GLUCUROCAT-PWY	1	SparCC
FAO-PWY	GALACTUROCAT-PWY	1	SparCC
FAO-PWY	GLUCOSE1PMETAB-PWY	2	SpiecEasi,SparCC
FAO-PWY	GLUCUROCAT-PWY	1	SparCC
FAO-PWY	GLUTORN-PWY	1	SparCC
FAO-PWY	GLYCOCAT-PWY	1	SparCC
FAO-PWY	GLYCOGENSYNTH-PWY	1	SparCC
FAO-PWY	GLYCOL-GLYOXDEG-PWY	1	SparCC
FAO-PWY	GLYCOLYSIS	1	SparCC
FAO-PWY	GLYCOLYSIS-TCA-GLYOX-BYPASS	1	SparCC
FAO-PWY	GLYOXYLATE-BYPASS	1	SparCC
FAO-PWY	HEME-BIOSYNTHESIS-II	1	SparCC
FAO-PWY	HEMESYN2-PWY	1	SparCC
FAO-PWY	HISTSYN-PWY	1	SparCC
FAO-PWY	HOMOSER-METSYN-PWY	1	SparCC
FAO-PWY	ILEUSYN-PWY	1	SparCC
FAO-PWY	KDO-NAGLIPASYN-PWY	1	SparCC
FAO-PWY	KETOGLUCONMET-PWY	1	SparCC
FAO-PWY	LACTOSECAT-PWY	1	SparCC
FAO-PWY	MET-SAM-PWY	1	SparCC
FAO-PWY	METH-ACETATE-PWY	1	SparCC
FAO-PWY	NAD-BIOSYNTHESIS-II	2	SpiecEasi,SparCC
FAO-PWY	NONOXIPENT-PWY	1	SparCC
FAO-PWY	OANTIGEN-PWY	1	SparCC
FAO-PWY	P122-PWY	1	SparCC
FAO-PWY	P124-PWY	1	SparCC
FAO-PWY	P161-PWY	1	SparCC
FAO-PWY	P162-PWY	1	SparCC
FAO-PWY	P163-PWY	1	SparCC
FAO-PWY	P164-PWY	1	SparCC
FAO-PWY	P221-PWY	1	SparCC
FAO-PWY	P241-PWY	1	SparCC
FAO-PWY	P261-PWY	1	SparCC
FAO-PWY	P4-PWY	1	SparCC
FASYN-ELONG-PWY	GALACTUROCAT-PWY	1	SparCC
FASYN-ELONG-PWY	GLUCONEO-PWY	1	SparCC
FASYN-ELONG-PWY	GLUCOSE1PMETAB-PWY	1	SparCC
FASYN-ELONG-PWY	GLUCUROCAT-PWY	1	SparCC
FASYN-ELONG-PWY	GLYCOL-GLYOXDEG-PWY	1	SparCC
FASYN-ELONG-PWY	GLYCOLYSIS	1	SparCC
FASYN-ELONG-PWY	GLYCOLYSIS-E-D	1	SparCC
FASYN-ELONG-PWY	GLYCOLYSIS-TCA-GLYOX-BYPASS	1	SparCC
FASYN-ELONG-PWY	GOLPDLCAT-PWY	1	SparCC
FASYN-ELONG-PWY	LIPASYN-PWY	1	SparCC
FASYN-ELONG-PWY	MET-SAM-PWY	1	SparCC
FASYN-ELONG-PWY	METH-ACETATE-PWY	1	SparCC
FASYN-ELONG-PWY	NAD-BIOSYNTHESIS-II	1	SparCC
FASYN-ELONG-PWY	NONOXIPENT-PWY	1	SparCC
FASYN-ELONG-PWY	OANTIGEN-PWY	1	SparCC
FASYN-ELONG-PWY	P122-PWY	1	SparCC
FASYN-ELONG-PWY	P124-PWY	1	SparCC
FASYN-ELONG-PWY	P161-PWY	1	SparCC
FASYN-ELONG-PWY	P163-PWY	1	SparCC
FASYN-ELONG-PWY	P241-PWY	1	SparCC
FASYN-ELONG-PWY	P261-PWY	1	SparCC
FASYN-INITIAL-PWY	FERMENTATION-PWY	1	SparCC
FASYN-INITIAL-PWY	FOLSYN-PWY	1	SparCC
FASYN-INITIAL-PWY	GALLATE-DEGRADATION-I-PWY	1	SparCC
FASYN-INITIAL-PWY	GLUCONEO-PWY	1	SparCC
FASYN-INITIAL-PWY	GLUTORN-PWY	1	SparCC
FASYN-INITIAL-PWY	GLYCOCAT-PWY	1	SparCC
FASYN-INITIAL-PWY	GLYCOGENSYNTH-PWY	1	SparCC
FASYN-INITIAL-PWY	GLYCOLYSIS-E-D	1	SparCC
FASYN-INITIAL-PWY	GLYCOLYSIS-TCA-GLYOX-BYPASS	1	SparCC
FASYN-INITIAL-PWY	GLYOXYLATE-BYPASS	2	SpiecEasi,SparCC
FASYN-INITIAL-PWY	HCAMHPDEG-PWY	1	SparCC
FASYN-INITIAL-PWY	HEME-BIOSYNTHESIS-II	2	SpiecEasi,SparCC
FASYN-INITIAL-PWY	HEMESYN2-PWY	2	SpiecEasi,SparCC
FASYN-INITIAL-PWY	HISDEG-PWY	1	SparCC
FASYN-INITIAL-PWY	HISTSYN-PWY	1	SparCC
FASYN-INITIAL-PWY	HOMOSER-METSYN-PWY	1	SparCC
FASYN-INITIAL-PWY	HSERMETANA-PWY	1	SparCC
FASYN-INITIAL-PWY	ILEUSYN-PWY	1	SparCC
FASYN-INITIAL-PWY	MET-SAM-PWY	1	SparCC
FASYN-INITIAL-PWY	METH-ACETATE-PWY	1	SparCC
FASYN-INITIAL-PWY	METHYLGALLATE-DEGRADATION-PWY	1	SparCC
FASYN-INITIAL-PWY	NAD-BIOSYNTHESIS-II	1	SparCC
FASYN-INITIAL-PWY	NAGLIPASYN-PWY	1	SparCC
FASYN-INITIAL-PWY	NONMEVIPP-PWY	1	SparCC
FASYN-INITIAL-PWY	NONOXIPENT-PWY	1	SparCC
FASYN-INITIAL-PWY	OANTIGEN-PWY	1	SparCC
FASYN-INITIAL-PWY	P105-PWY	2	SpiecEasi,SparCC
FASYN-INITIAL-PWY	P161-PWY	1	SparCC
FASYN-INITIAL-PWY	P163-PWY	1	SparCC
FASYN-INITIAL-PWY	P184-PWY	1	SparCC
FASYN-INITIAL-PWY	P261-PWY	1	SparCC
FASYN-INITIAL-PWY	P4-PWY	1	SparCC
FERMENTATION-PWY	FOLSYN-PWY	2	SpiecEasi,SparCC
FERMENTATION-PWY	GALLATE-DEGRADATION-I-PWY	1	SparCC
FERMENTATION-PWY	GLUCONEO-PWY	1	SparCC
FERMENTATION-PWY	GLUTORN-PWY	1	SparCC
FERMENTATION-PWY	GLYCOCAT-PWY	1	SparCC
FERMENTATION-PWY	GLYCOGENSYNTH-PWY	1	SparCC
FERMENTATION-PWY	GLYCOLYSIS	1	SparCC
FERMENTATION-PWY	GLYCOLYSIS-E-D	1	SparCC
FERMENTATION-PWY	GLYCOLYSIS-TCA-GLYOX-BYPASS	1	SparCC
FERMENTATION-PWY	GLYOXYLATE-BYPASS	1	SparCC
FERMENTATION-PWY	HEME-BIOSYNTHESIS-II	1	SparCC
FERMENTATION-PWY	HEMESYN2-PWY	1	SparCC
FERMENTATION-PWY	HEXITOLDEGSUPER-PWY	1	SparCC
FERMENTATION-PWY	HISDEG-PWY	1	SparCC
FERMENTATION-PWY	HISTSYN-PWY	1	SparCC
FERMENTATION-PWY	HOMOSER-METSYN-PWY	1	SparCC
FERMENTATION-PWY	HSERMETANA-PWY	1	SparCC
FERMENTATION-PWY	ILEUSYN-PWY	1	SparCC
FERMENTATION-PWY	LEU-DEG2-PWY	1	SparCC
FERMENTATION-PWY	MET-SAM-PWY	1	SparCC
FERMENTATION-PWY	NAGLIPASYN-PWY	1	SparCC
FERMENTATION-PWY	NONMEVIPP-PWY	1	SparCC
FERMENTATION-PWY	NONOXIPENT-PWY	1	SparCC
FERMENTATION-PWY	OANTIGEN-PWY	1	SparCC
FERMENTATION-PWY	P105-PWY	2	SpiecEasi,SparCC
FERMENTATION-PWY	P108-PWY	1	SparCC
FERMENTATION-PWY	P184-PWY	1	SparCC
FERMENTATION-PWY	P281-PWY	1	SparCC
FERMENTATION-PWY	P4-PWY	1	SparCC
FOLSYN-PWY	GALLATE-DEGRADATION-I-PWY	1	SparCC
FOLSYN-PWY	GLUCONEO-PWY	2	SpiecEasi,SparCC
FOLSYN-PWY	GLUTORN-PWY	1	SparCC
FOLSYN-PWY	GLYCOCAT-PWY	1	SparCC
FOLSYN-PWY	GLYCOGENSYNTH-PWY	1	SparCC
FOLSYN-PWY	GLYCOLYSIS-E-D	1	SparCC
FOLSYN-PWY	GLYCOLYSIS-TCA-GLYOX-BYPASS	1	SparCC
FOLSYN-PWY	GLYOXYLATE-BYPASS	1	SparCC
FOLSYN-PWY	HCAMHPDEG-PWY	1	SparCC
FOLSYN-PWY	HEME-BIOSYNTHESIS-II	1	SparCC
FOLSYN-PWY	HEMESYN2-PWY	1	SparCC
FOLSYN-PWY	HEXITOLDEGSUPER-PWY	1	SparCC
FOLSYN-PWY	HISDEG-PWY	1	SparCC
FOLSYN-PWY	HISTSYN-PWY	1	SparCC
FOLSYN-PWY	HOMOSER-METSYN-PWY	1	SparCC
FOLSYN-PWY	HSERMETANA-PWY	1	SparCC
FOLSYN-PWY	ILEUSYN-PWY	1	SparCC
FOLSYN-PWY	MET-SAM-PWY	1	SparCC
FOLSYN-PWY	METH-ACETATE-PWY	1	SparCC
FOLSYN-PWY	METHYLGALLATE-DEGRADATION-PWY	1	SparCC
FOLSYN-PWY	NAGLIPASYN-PWY	2	SpiecEasi,SparCC
FOLSYN-PWY	NONMEVIPP-PWY	1	SparCC
FOLSYN-PWY	NONOXIPENT-PWY	1	SparCC
FOLSYN-PWY	OANTIGEN-PWY	1	SparCC
FOLSYN-PWY	P105-PWY	1	SparCC
FOLSYN-PWY	P108-PWY	1	SparCC
FOLSYN-PWY	P125-PWY	1	SparCC
FOLSYN-PWY	P161-PWY	1	SparCC
FOLSYN-PWY	P163-PWY	1	SparCC
FOLSYN-PWY	P184-PWY	1	SparCC
FOLSYN-PWY	P23-PWY	1	SparCC
FOLSYN-PWY	P261-PWY	1	SparCC
FOLSYN-PWY	P4-PWY	1	SparCC
FUC-RHAMCAT-PWY	FUCCAT-PWY	2	SpiecEasi,SparCC
FUC-RHAMCAT-PWY	GALACT-GLUCUROCAT-PWY	1	SparCC
FUC-RHAMCAT-PWY	GALACTARDEG-PWY	1	SparCC
FUC-RHAMCAT-PWY	GALACTUROCAT-PWY	1	SparCC
FUC-RHAMCAT-PWY	GALLATE-DEGRADATION-I-PWY	1	SparCC
FUC-RHAMCAT-PWY	GALLATE-DEGRADATION-II-PWY	1	SparCC
FUC-RHAMCAT-PWY	GLCMANNANAUT-PWY	1	SparCC
FUC-RHAMCAT-PWY	GLUCARDEG-PWY	1	SparCC
FUC-RHAMCAT-PWY	GLUCARGALACTSUPER-PWY	1	SparCC
FUC-RHAMCAT-PWY	GLUCUROCAT-PWY	1	SparCC
FUC-RHAMCAT-PWY	GLYCOLYSIS	1	SparCC
FUC-RHAMCAT-PWY	HCAMHPDEG-PWY	1	SparCC
FUC-RHAMCAT-PWY	HEXITOLDEGSUPER-PWY	1	SparCC
FUC-RHAMCAT-PWY	KDO-NAGLIPASYN-PWY	1	SparCC
FUC-RHAMCAT-PWY	LEU-DEG2-PWY	2	SpiecEasi,SparCC
FUC-RHAMCAT-PWY	LIPASYN-PWY	1	SparCC
FUC-RHAMCAT-PWY	LPSSYN-PWY	1	SparCC
FUC-RHAMCAT-PWY	METHYLGALLATE-DEGRADATION-PWY	1	SparCC
FUC-RHAMCAT-PWY	NAD-BIOSYNTHESIS-II	1	SparCC
FUC-RHAMCAT-PWY	NADSYN-PWY	1	SparCC
FUC-RHAMCAT-PWY	NONOXIPENT-PWY	1	SparCC
FUC-RHAMCAT-PWY	OANTIGEN-PWY	1	SparCC
FUC-RHAMCAT-PWY	ORNARGDEG-PWY	1	SparCC
FUC-RHAMCAT-PWY	ORNDEG-PWY	1	SparCC
FUC-RHAMCAT-PWY	P101-PWY	1	SparCC
FUC-RHAMCAT-PWY	P163-PWY	1	SparCC
FUC-RHAMCAT-PWY	P221-PWY	1	SparCC
FUC-RHAMCAT-PWY	P241-PWY	1	SparCC
FUCCAT-PWY	GALACT-GLUCUROCAT-PWY	1	SparCC
FUCCAT-PWY	GALACTUROCAT-PWY	1	SparCC
FUCCAT-PWY	GALLATE-DEGRADATION-I-PWY	1	SparCC
FUCCAT-PWY	GALLATE-DEGRADATION-II-PWY	1	SparCC
FUCCAT-PWY	GLCMANNANAUT-PWY	2	SpiecEasi,SparCC
FUCCAT-PWY	GLUCARDEG-PWY	1	SparCC
FUCCAT-PWY	GLUCARGALACTSUPER-PWY	1	SparCC
FUCCAT-PWY	GLUCUROCAT-PWY	1	SparCC
FUCCAT-PWY	GLYCOL-GLYOXDEG-PWY	1	SparCC
FUCCAT-PWY	HCAMHPDEG-PWY	2	SpiecEasi,SparCC
FUCCAT-PWY	HEXITOLDEGSUPER-PWY	1	SparCC
FUCCAT-PWY	KDO-NAGLIPASYN-PWY	1	SparCC
FUCCAT-PWY	LEU-DEG2-PWY	1	SparCC
FUCCAT-PWY	LIPASYN-PWY	1	SparCC
FUCCAT-PWY	LPSSYN-PWY	2	SpiecEasi,SparCC
FUCCAT-PWY	METHYLGALLATE-DEGRADATION-PWY	1	SparCC
FUCCAT-PWY	NADSYN-PWY	1	SparCC
FUCCAT-PWY	NONOXIPENT-PWY	1	SparCC
FUCCAT-PWY	OANTIGEN-PWY	1	SparCC
FUCCAT-PWY	P161-PWY	1	SparCC
FUCCAT-PWY	P163-PWY	1	SparCC
FUCCAT-PWY	P184-PWY	1	SparCC
FUCCAT-PWY	P221-PWY	1	SparCC
FUCCAT-PWY	P241-PWY	1	SparCC
FUCCAT-PWY	P261-PWY	1	SparCC
GALACT-GLUCUROCAT-PWY	GALACTUROCAT-PWY	2	SpiecEasi,SparCC
GALACT-GLUCUROCAT-PWY	GALLATE-DEGRADATION-I-PWY	1	SparCC
GALACT-GLUCUROCAT-PWY	GALLATE-DEGRADATION-II-PWY	1	SparCC
GALACT-GLUCUROCAT-PWY	GLCMANNANAUT-PWY	1	SparCC
GALACT-GLUCUROCAT-PWY	GLUCONEO-PWY	1	SparCC
GALACT-GLUCUROCAT-PWY	GLUCOSE1PMETAB-PWY	1	SparCC
GALACT-GLUCUROCAT-PWY	GLUCUROCAT-PWY	2	SpiecEasi,SparCC
GALACT-GLUCUROCAT-PWY	GLUTORN-PWY	1	SparCC
GALACT-GLUCUROCAT-PWY	GLYCOCAT-PWY	1	SparCC
GALACT-GLUCUROCAT-PWY	GLYCOGENSYNTH-PWY	1	SparCC
GALACT-GLUCUROCAT-PWY	GLYCOLYSIS	1	SparCC
GALACT-GLUCUROCAT-PWY	GLYCOLYSIS-TCA-GLYOX-BYPASS	1	SparCC
GALACT-GLUCUROCAT-PWY	HCAMHPDEG-PWY	1	SparCC
GALACT-GLUCUROCAT-PWY	HEXITOLDEGSUPER-PWY	1	SparCC
GALACT-GLUCUROCAT-PWY	HISTSYN-PWY	1	SparCC
GALACT-GLUCUROCAT-PWY	HSERMETANA-PWY	1	SparCC
GALACT-GLUCUROCAT-PWY	ILEUSYN-PWY	1	SparCC
GALACT-GLUCUROCAT-PWY	KDO-NAGLIPASYN-PWY	2	SpiecEasi,SparCC
GALACT-GLUCUROCAT-PWY	LEU-DEG2-PWY	1	SparCC
GALACT-GLUCUROCAT-PWY	LIPASYN-PWY	1	SparCC
GALACT-GLUCUROCAT-PWY	LPSSYN-PWY	1	SparCC
GALACT-GLUCUROCAT-PWY	MET-SAM-PWY	1	SparCC
GALACT-GLUCUROCAT-PWY	METH-ACETATE-PWY	1	SparCC
GALACT-GLUCUROCAT-PWY	METHYLGALLATE-DEGRADATION-PWY	1	SparCC
GALACT-GLUCUROCAT-PWY	NAD-BIOSYNTHESIS-II	2	SpiecEasi,SparCC
GALACT-GLUCUROCAT-PWY	NADSYN-PWY	1	SparCC
GALACT-GLUCUROCAT-PWY	NONMEVIPP-PWY	1	SparCC
GALACT-GLUCUROCAT-PWY	NONOXIPENT-PWY	1	SparCC
GALACT-GLUCUROCAT-PWY	OANTIGEN-PWY	1	SparCC
GALACT-GLUCUROCAT-PWY	P161-PWY	1	SparCC
GALACT-GLUCUROCAT-PWY	P163-PWY	1	SparCC
GALACT-GLUCUROCAT-PWY	P164-PWY	1	SparCC
GALACT-GLUCUROCAT-PWY	P23-PWY	1	SparCC
GALACT-GLUCUROCAT-PWY	P241-PWY	1	SparCC
GALACT-GLUCUROCAT-PWY	P261-PWY	1	SparCC
GALACT-GLUCUROCAT-PWY	P4-PWY	1	SparCC
GALACTARDEG-PWY	GLUCARDEG-PWY	2	SpiecEasi,SparCC
GALACTARDEG-PWY	GLUCARGALACTSUPER-PWY	2	SpiecEasi,SparCC
GALACTARDEG-PWY	GLYCOGENSYNTH-PWY	1	SparCC
GALACTARDEG-PWY	GLYCOLYSIS	1	SparCC
GALACTARDEG-PWY	HSERMETANA-PWY	1	SparCC
GALACTARDEG-PWY	KDO-NAGLIPASYN-PWY	1	SparCC
GALACTARDEG-PWY	KETOGLUCONMET-PWY	1	SparCC
GALACTARDEG-PWY	LEU-DEG2-PWY	1	SparCC
GALACTARDEG-PWY	LPSSYN-PWY	1	SparCC
GALACTARDEG-PWY	NAD-BIOSYNTHESIS-II	1	SparCC
GALACTARDEG-PWY	OANTIGEN-PWY	1	SparCC
GALACTARDEG-PWY	ORNARGDEG-PWY	1	SparCC
GALACTARDEG-PWY	ORNDEG-PWY	1	SparCC
GALACTARDEG-PWY	P101-PWY	1	SparCC
GALACTARDEG-PWY	P108-PWY	1	SparCC
GALACTARDEG-PWY	P23-PWY	1	SparCC
GALACTUROCAT-PWY	GALLATE-DEGRADATION-I-PWY	1	SparCC
GALACTUROCAT-PWY	GALLATE-DEGRADATION-II-PWY	1	SparCC
GALACTUROCAT-PWY	GLCMANNANAUT-PWY	1	SparCC
GALACTUROCAT-PWY	GLUCONEO-PWY	1	SparCC
GALACTUROCAT-PWY	GLUCOSE1PMETAB-PWY	1	SparCC
GALACTUROCAT-PWY	GLUCUROCAT-PWY	2	SpiecEasi,SparCC
GALACTUROCAT-PWY	GLUTORN-PWY	1	SparCC
GALACTUROCAT-PWY	GLYCOCAT-PWY	1	SparCC
GALACTUROCAT-PWY	GLYCOGENSYNTH-PWY	1	SparCC
GALACTUROCAT-PWY	GLYCOLYSIS	1	SparCC
GALACTUROCAT-PWY	GLYCOLYSIS-E-D	1	SparCC
GALACTUROCAT-PWY	GLYCOLYSIS-TCA-GLYOX-BYPASS	1	SparCC
GALACTUROCAT-PWY	HCAMHPDEG-PWY	1	SparCC
GALACTUROCAT-PWY	HISTSYN-PWY	1	SparCC
GALACTUROCAT-PWY	HOMOSER-METSYN-PWY	1	SparCC
GALACTUROCAT-PWY	HSERMETANA-PWY	1	SparCC
GALACTUROCAT-PWY	ILEUSYN-PWY	1	SparCC
GALACTUROCAT-PWY	KDO-NAGLIPASYN-PWY	1	SparCC
GALACTUROCAT-PWY	LEU-DEG2-PWY	1	SparCC
GALACTUROCAT-PWY	LIPASYN-PWY	1	SparCC
GALACTUROCAT-PWY	LPSSYN-PWY	1	SparCC
GALACTUROCAT-PWY	MET-SAM-PWY	1	SparCC
GALACTUROCAT-PWY	METH-ACETATE-PWY	1	SparCC
GALACTUROCAT-PWY	NAD-BIOSYNTHESIS-II	1	SparCC
GALACTUROCAT-PWY	NONMEVIPP-PWY	1	SparCC
GALACTUROCAT-PWY	NONOXIPENT-PWY	1	SparCC
GALACTUROCAT-PWY	OANTIGEN-PWY	1	SparCC
GALACTUROCAT-PWY	P161-PWY	1	SparCC
GALACTUROCAT-PWY	P162-PWY	1	SparCC
GALACTUROCAT-PWY	P163-PWY	1	SparCC
GALACTUROCAT-PWY	P164-PWY	1	SparCC
GALACTUROCAT-PWY	P23-PWY	1	SparCC
GALACTUROCAT-PWY	P241-PWY	1	SparCC
GALACTUROCAT-PWY	P261-PWY	1	SparCC
GALACTUROCAT-PWY	P4-PWY	1	SparCC
GALLATE-DEGRADATION-I-PWY	GALLATE-DEGRADATION-II-PWY	1	SparCC
GALLATE-DEGRADATION-I-PWY	GLUCONEO-PWY	1	SparCC
GALLATE-DEGRADATION-I-PWY	GLUCUROCAT-PWY	1	SparCC
GALLATE-DEGRADATION-I-PWY	GLUTORN-PWY	1	SparCC
GALLATE-DEGRADATION-I-PWY	GLYCOLYSIS-E-D	1	SparCC
GALLATE-DEGRADATION-I-PWY	GLYCOLYSIS-TCA-GLYOX-BYPASS	1	SparCC
GALLATE-DEGRADATION-I-PWY	GOLPDLCAT-PWY	1	SparCC
GALLATE-DEGRADATION-I-PWY	HCAMHPDEG-PWY	1	SparCC
GALLATE-DEGRADATION-I-PWY	HEME-BIOSYNTHESIS-II	1	SparCC
GALLATE-DEGRADATION-I-PWY	HEMESYN2-PWY	1	SparCC
GALLATE-DEGRADATION-I-PWY	HEXITOLDEGSUPER-PWY	1	SparCC
GALLATE-DEGRADATION-I-PWY	HISDEG-PWY	1	SparCC
GALLATE-DEGRADATION-I-PWY	HISTSYN-PWY	1	SparCC
GALLATE-DEGRADATION-I-PWY	KDO-NAGLIPASYN-PWY	1	SparCC
GALLATE-DEGRADATION-I-PWY	LIPASYN-PWY	1	SparCC
GALLATE-DEGRADATION-I-PWY	METHYLGALLATE-DEGRADATION-PWY	2	SpiecEasi,SparCC
GALLATE-DEGRADATION-I-PWY	NADSYN-PWY	2	SpiecEasi,SparCC
GALLATE-DEGRADATION-I-PWY	NAGLIPASYN-PWY	1	SparCC
GALLATE-DEGRADATION-I-PWY	P101-PWY	1	SparCC
GALLATE-DEGRADATION-I-PWY	P105-PWY	1	SparCC
GALLATE-DEGRADATION-I-PWY	P164-PWY	1	SparCC
GALLATE-DEGRADATION-I-PWY	P184-PWY	2	SpiecEasi,SparCC
GALLATE-DEGRADATION-I-PWY	P281-PWY	1	SparCC
GALLATE-DEGRADATION-II-PWY	GLCMANNANAUT-PWY	1	SparCC
GALLATE-DEGRADATION-II-PWY	GLUCONEO-PWY	1	SparCC
GALLATE-DEGRADATION-II-PWY	GLUCUROCAT-PWY	1	SparCC
GALLATE-DEGRADATION-II-PWY	GLUTORN-PWY	1	SparCC
GALLATE-DEGRADATION-II-PWY	GLYCOCAT-PWY	1	SparCC
GALLATE-DEGRADATION-II-PWY	GLYCOGENSYNTH-PWY	1	SparCC
GALLATE-DEGRADATION-II-PWY	GLYCOLYSIS-E-D	1	SparCC
GALLATE-DEGRADATION-II-PWY	GLYCOLYSIS-TCA-GLYOX-BYPASS	1	SparCC
GALLATE-DEGRADATION-II-PWY	HCAMHPDEG-PWY	1	SparCC
GALLATE-DEGRADATION-II-PWY	HEXITOLDEGSUPER-PWY	1	SparCC
GALLATE-DEGRADATION-II-PWY	HISTSYN-PWY	1	SparCC
GALLATE-DEGRADATION-II-PWY	HSERMETANA-PWY	1	SparCC
GALLATE-DEGRADATION-II-PWY	KDO-NAGLIPASYN-PWY	1	SparCC
GALLATE-DEGRADATION-II-PWY	LEU-DEG2-PWY	1	SparCC
GALLATE-DEGRADATION-II-PWY	LIPASYN-PWY	1	SparCC
GALLATE-DEGRADATION-II-PWY	LPSSYN-PWY	1	SparCC
GALLATE-DEGRADATION-II-PWY	METH-ACETATE-PWY	1	SparCC
GALLATE-DEGRADATION-II-PWY	METHYLGALLATE-DEGRADATION-PWY	1	SparCC
GALLATE-DEGRADATION-II-PWY	NAD-BIOSYNTHESIS-II	1	SparCC
GALLATE-DEGRADATION-II-PWY	NADSYN-PWY	2	SpiecEasi,SparCC
GALLATE-DEGRADATION-II-PWY	NAGLIPASYN-PWY	1	SparCC
GALLATE-DEGRADATION-II-PWY	OANTIGEN-PWY	1	SparCC
GALLATE-DEGRADATION-II-PWY	P101-PWY	1	SparCC
GALLATE-DEGRADATION-II-PWY	P105-PWY	1	SparCC
GALLATE-DEGRADATION-II-PWY	P163-PWY	1	SparCC
GALLATE-DEGRADATION-II-PWY	P241-PWY	1	SparCC
GALLATE-DEGRADATION-II-PWY	P261-PWY	2	SpiecEasi,SparCC
GALLATE-DEGRADATION-II-PWY	P281-PWY	1	SparCC
GLCMANNANAUT-PWY	GLUCUROCAT-PWY	1	SparCC
GLCMANNANAUT-PWY	GLUTORN-PWY	1	SparCC
GLCMANNANAUT-PWY	GLYCOL-GLYOXDEG-PWY	1	SparCC
GLCMANNANAUT-PWY	GLYCOLYSIS	1	SparCC
GLCMANNANAUT-PWY	HCAMHPDEG-PWY	1	SparCC
GLCMANNANAUT-PWY	HEXITOLDEGSUPER-PWY	1	SparCC
GLCMANNANAUT-PWY	HISTSYN-PWY	1	SparCC
GLCMANNANAUT-PWY	HOMOSER-METSYN-PWY	1	SparCC
GLCMANNANAUT-PWY	HSERMETANA-PWY	1	SparCC
GLCMANNANAUT-PWY	ILEUSYN-PWY	1	SparCC
GLCMANNANAUT-PWY	LEU-DEG2-PWY	1	SparCC
GLCMANNANAUT-PWY	LIPASYN-PWY	1	SparCC
GLCMANNANAUT-PWY	LPSSYN-PWY	1	SparCC
GLCMANNANAUT-PWY	MET-SAM-PWY	1	SparCC
GLCMANNANAUT-PWY	METH-ACETATE-PWY	1	SparCC
GLCMANNANAUT-PWY	NONOXIPENT-PWY	1	SparCC
GLCMANNANAUT-PWY	OANTIGEN-PWY	1	SparCC
GLCMANNANAUT-PWY	P108-PWY	1	SparCC
GLCMANNANAUT-PWY	P161-PWY	1	SparCC
GLCMANNANAUT-PWY	P163-PWY	1	SparCC
GLCMANNANAUT-PWY	P241-PWY	1	SparCC
GLCMANNANAUT-PWY	P261-PWY	1	SparCC
GLCMANNANAUT-PWY	P4-PWY	1	SparCC
GLUCARDEG-PWY	GLUCARGALACTSUPER-PWY	2	SpiecEasi,SparCC
GLUCARDEG-PWY	GLYCOLYSIS	1	SparCC
GLUCARDEG-PWY	HISDEG-PWY	1	SparCC
GLUCARDEG-PWY	KDO-NAGLIPASYN-PWY	1	SparCC
GLUCARDEG-PWY	KETOGLUCONMET-PWY	1	SparCC
GLUCARDEG-PWY	LEU-DEG2-PWY	1	SparCC
GLUCARDEG-PWY	LPSSYN-PWY	2	SpiecEasi,SparCC
GLUCARDEG-PWY	NAD-BIOSYNTHESIS-II	1	SparCC
GLUCARDEG-PWY	OANTIGEN-PWY	1	SparCC
GLUCARDEG-PWY	ORNARGDEG-PWY	1	SparCC
GLUCARDEG-PWY	ORNDEG-PWY	1	SparCC
GLUCARDEG-PWY	P101-PWY	1	SparCC
GLUCARDEG-PWY	P108-PWY	1	SparCC
GLUCARDEG-PWY	P23-PWY	1	SparCC
GLUCARGALACTSUPER-PWY	GLYCOCAT-PWY	1	SparCC
GLUCARGALACTSUPER-PWY	GLYCOGENSYNTH-PWY	1	SparCC
GLUCARGALACTSUPER-PWY	HSERMETANA-PWY	1	SparCC
GLUCARGALACTSUPER-PWY	KDO-NAGLIPASYN-PWY	1	SparCC
GLUCARGALACTSUPER-PWY	KETOGLUCONMET-PWY	1	SparCC
GLUCARGALACTSUPER-PWY	LEU-DEG2-PWY	1	SparCC
GLUCARGALACTSUPER-PWY	LPSSYN-PWY	1	SparCC
GLUCARGALACTSUPER-PWY	NAD-BIOSYNTHESIS-II	1	SparCC
GLUCARGALACTSUPER-PWY	OANTIGEN-PWY	1	SparCC
GLUCARGALACTSUPER-PWY	ORNARGDEG-PWY	1	SparCC
GLUCARGALACTSUPER-PWY	ORNDEG-PWY	1	SparCC
GLUCARGALACTSUPER-PWY	P101-PWY	1	SparCC
GLUCARGALACTSUPER-PWY	P108-PWY	1	SparCC
GLUCARGALACTSUPER-PWY	P23-PWY	1	SparCC
GLUCONEO-PWY	GLUCUROCAT-PWY	1	SparCC
GLUCONEO-PWY	GLUTORN-PWY	1	SparCC
GLUCONEO-PWY	GLYCOCAT-PWY	1	SparCC
GLUCONEO-PWY	GLYCOGENSYNTH-PWY	1	SparCC
GLUCONEO-PWY	GLYCOLYSIS-E-D	2	SpiecEasi,SparCC
GLUCONEO-PWY	GLYCOLYSIS-TCA-GLYOX-BYPASS	1	SparCC
GLUCONEO-PWY	HCAMHPDEG-PWY	1	SparCC
GLUCONEO-PWY	HEME-BIOSYNTHESIS-II	1	SparCC
GLUCONEO-PWY	HEMESYN2-PWY	1	SparCC
GLUCONEO-PWY	HEXITOLDEGSUPER-PWY	2	SpiecEasi,SparCC
GLUCONEO-PWY	HISTSYN-PWY	1	SparCC
GLUCONEO-PWY	HOMOSER-METSYN-PWY	1	SparCC
GLUCONEO-PWY	HSERMETANA-PWY	1	SparCC
GLUCONEO-PWY	ILEUSYN-PWY	1	SparCC
GLUCONEO-PWY	LIPASYN-PWY	1	SparCC
GLUCONEO-PWY	MET-SAM-PWY	1	SparCC
GLUCONEO-PWY	METH-ACETATE-PWY	1	SparCC
GLUCONEO-PWY	NAGLIPASYN-PWY	1	SparCC
GLUCONEO-PWY	NONMEVIPP-PWY	1	SparCC
GLUCONEO-PWY	NONOXIPENT-PWY	1	SparCC
GLUCONEO-PWY	OANTIGEN-PWY	1	SparCC
GLUCONEO-PWY	P105-PWY	1	SparCC
GLUCONEO-PWY	P108-PWY	1	SparCC
GLUCONEO-PWY	P125-PWY	1	SparCC
GLUCONEO-PWY	P161-PWY	1	SparCC
GLUCONEO-PWY	P163-PWY	1	SparCC
GLUCONEO-PWY	P184-PWY	1	SparCC
GLUCONEO-PWY	P221-PWY	1	SparCC
GLUCONEO-PWY	P23-PWY	1	SparCC
GLUCONEO-PWY	P241-PWY	1	SparCC
GLUCONEO-PWY	P261-PWY	1	SparCC
GLUCONEO-PWY	P4-PWY	1	SparCC
GLUCOSE1PMETAB-PWY	GLUCUROCAT-PWY	1	SparCC
GLUCOSE1PMETAB-PWY	GLYCOCAT-PWY	1	SparCC
GLUCOSE1PMETAB-PWY	GLYCOGENSYNTH-PWY	1	SparCC
GLUCOSE1PMETAB-PWY	GLYCOL-GLYOXDEG-PWY	1	SparCC
GLUCOSE1PMETAB-PWY	GLYCOLYSIS	1	SparCC
GLUCOSE1PMETAB-PWY	GLYCOLYSIS-E-D	1	SparCC
GLUCOSE1PMETAB-PWY	GLYCOLYSIS-TCA-GLYOX-BYPASS	1	SparCC
GLUCOSE1PMETAB-PWY	GLYOXYLATE-BYPASS	1	SparCC
GLUCOSE1PMETAB-PWY	HISDEG-PWY	1	SparCC
GLUCOSE1PMETAB-PWY	HISTSYN-PWY	1	SparCC
GLUCOSE1PMETAB-PWY	HOMOSER-METSYN-PWY	1	SparCC
GLUCOSE1PMETAB-PWY	ILEUSYN-PWY	1	SparCC
GLUCOSE1PMETAB-PWY	KDO-NAGLIPASYN-PWY	1	SparCC
GLUCOSE1PMETAB-PWY	KETOGLUCONMET-PWY	1	SparCC
GLUCOSE1PMETAB-PWY	LACTOSECAT-PWY	1	SparCC
GLUCOSE1PMETAB-PWY	LEU-DEG2-PWY	1	SparCC
GLUCOSE1PMETAB-PWY	LPSSYN-PWY	1	SparCC
GLUCOSE1PMETAB-PWY	MET-SAM-PWY	1	SparCC
GLUCOSE1PMETAB-PWY	METH-ACETATE-PWY	1	SparCC
GLUCOSE1PMETAB-PWY	NAD-BIOSYNTHESIS-II	2	SpiecEasi,SparCC
GLUCOSE1PMETAB-PWY	NONOXIPENT-PWY	1	SparCC
GLUCOSE1PMETAB-PWY	OANTIGEN-PWY	1	SparCC
GLUCOSE1PMETAB-PWY	P122-PWY	1	SparCC
GLUCOSE1PMETAB-PWY	P124-PWY	1	SparCC
GLUCOSE1PMETAB-PWY	P125-PWY	1	SparCC
GLUCOSE1PMETAB-PWY	P161-PWY	1	SparCC
GLUCOSE1PMETAB-PWY	P162-PWY	2	SpiecEasi,SparCC
GLUCOSE1PMETAB-PWY	P163-PWY	1	SparCC
GLUCOSE1PMETAB-PWY	P164-PWY	2	SpiecEasi,SparCC
GLUCOSE1PMETAB-PWY	P221-PWY	1	SparCC
GLUCOSE1PMETAB-PWY	P241-PWY	1	SparCC
GLUCOSE1PMETAB-PWY	P261-PWY	1	SparCC
GLUCOSE1PMETAB-PWY	P281-PWY	1	SparCC
GLUCOSE1PMETAB-PWY	P4-PWY	1	SparCC
GLUCUROCAT-PWY	GLUTORN-PWY	1	SparCC
GLUCUROCAT-PWY	GLYCOGENSYNTH-PWY	1	SparCC
GLUCUROCAT-PWY	GLYCOLYSIS	1	SparCC
GLUCUROCAT-PWY	GLYCOLYSIS-E-D	1	SparCC
GLUCUROCAT-PWY	GLYCOLYSIS-TCA-GLYOX-BYPASS	1	SparCC
GLUCUROCAT-PWY	HCAMHPDEG-PWY	1	SparCC
GLUCUROCAT-PWY	HISTSYN-PWY	1	SparCC
GLUCUROCAT-PWY	HOMOSER-METSYN-PWY	1	SparCC
GLUCUROCAT-PWY	HSERMETANA-PWY	1	SparCC
GLUCUROCAT-PWY	ILEUSYN-PWY	1	SparCC
GLUCUROCAT-PWY	KDO-NAGLIPASYN-PWY	1	SparCC
GLUCUROCAT-PWY	LEU-DEG2-PWY	1	SparCC
GLUCUROCAT-PWY	LIPASYN-PWY	1	SparCC
GLUCUROCAT-PWY	LPSSYN-PWY	1	SparCC
GLUCUROCAT-PWY	MET-SAM-PWY	1	SparCC
GLUCUROCAT-PWY	METH-ACETATE-PWY	1	SparCC
GLUCUROCAT-PWY	NAD-BIOSYNTHESIS-II	1	SparCC
GLUCUROCAT-PWY	NADSYN-PWY	1	SparCC
GLUCUROCAT-PWY	NONMEVIPP-PWY	1	SparCC
GLUCUROCAT-PWY	NONOXIPENT-PWY	1	SparCC
GLUCUROCAT-PWY	OANTIGEN-PWY	1	SparCC
GLUCUROCAT-PWY	P161-PWY	1	SparCC
GLUCUROCAT-PWY	P162-PWY	1	SparCC
GLUCUROCAT-PWY	P163-PWY	1	SparCC
GLUCUROCAT-PWY	P164-PWY	1	SparCC
GLUCUROCAT-PWY	P241-PWY	1	SparCC
GLUCUROCAT-PWY	P261-PWY	1	SparCC
GLUCUROCAT-PWY	P281-PWY	1	SparCC
GLUCUROCAT-PWY	P4-PWY	1	SparCC
GLUTORN-PWY	GLYCOCAT-PWY	1	SparCC
GLUTORN-PWY	GLYCOGENSYNTH-PWY	1	SparCC
GLUTORN-PWY	GLYCOLYSIS-E-D	1	SparCC
GLUTORN-PWY	GLYCOLYSIS-TCA-GLYOX-BYPASS	1	SparCC
GLUTORN-PWY	GLYOXYLATE-BYPASS	1	SparCC
GLUTORN-PWY	HCAMHPDEG-PWY	1	SparCC
GLUTORN-PWY	HEME-BIOSYNTHESIS-II	1	SparCC
GLUTORN-PWY	HEMESYN2-PWY	1	SparCC
GLUTORN-PWY	HEXITOLDEGSUPER-PWY	1	SparCC
GLUTORN-PWY	HISDEG-PWY	1	SparCC
GLUTORN-PWY	HISTSYN-PWY	2	SpiecEasi,SparCC
GLUTORN-PWY	HOMOSER-METSYN-PWY	1	SparCC
[truncated: 625 more rows]

[truncated: 1 more sheets: Table_S11]
